# Supplementary material for: The Dictyostelium Kinome—Analysis of the Protein Kinases from a Simple Model Organism
Source: PubMed Central journal article supplement (PMC1420674; doi:10.1371/journal.pgen.0020038), 2006-03-31
Supplement: pgen.0020038.sg003.pdf [file pgen.0020038.sg003.pdf]

## AGC GROUP

### AKT Family

Akt1  
Akt2\_ps  
DDB0220670

### MAST Family

DDB0220701  
DDB0216386  
DDB0220700  
DDB0185113  
DDB0229452

### NDR Family

NdrA  
NdrB  
NdrC  
NdrD  
DDB0231558  
DDB0216387

### PKD1 Family

Pdk1A  
Pdk1B

### PKA Family

PKA  
pk4  
DDB0185224

### SGK Family

pk2  
DDB0220702

### Unique kinases in the AGC Group

pk3

## CAMK GROUP

### CAMK1 Family

MLCK-A  
DDB0216385  
DDB0216309  
pXi  
DDB0216308  
DDB0229351  
DDB0216307  
DDB0216312

### CAMKL Family, AMPK Subfamily

Snf1

### CAMKL Family, BRSK Subfamily

DDB0229364

### CAMKL Family, LKB Subfamily

Lkb1

### CAMKL Family, MARK Subfamily

MARK-A  
MARK-B  
MARK-C

### CAMKL Family, QIK Subfamily

DDB0231454

### Unique kinase in the CAMKL Family

DDB0219986

### RAD53 Family

FHAK1  
FHAK2  
FHAK3  
FHAK4  
FHAK5

## CK1 GROUP

### CK1 Family

CK1, C2dup

### TTBK Family

DDB0216336

## CMGC GROUP

### CDK Family, CDC2 Subfamily

Cdc2

### CDK Family, CDK5 Subfamily

Cdk5

### CDK Family, CDK7 Subfamily

Cdk7

### CDK Family, CDK8 Subfamily

Cdk8

0 100 500 1000 2000 3000 4000 4600

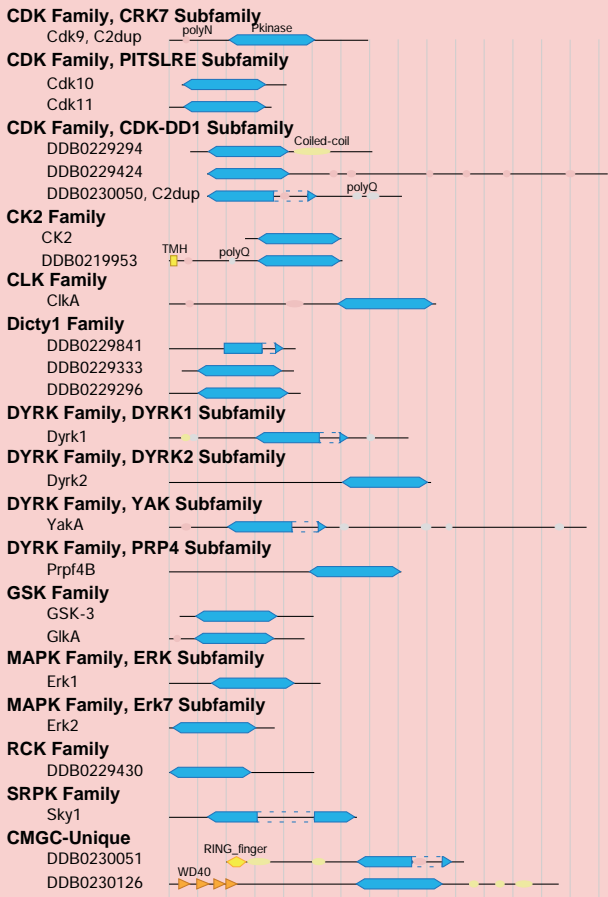

**STE GROUP**

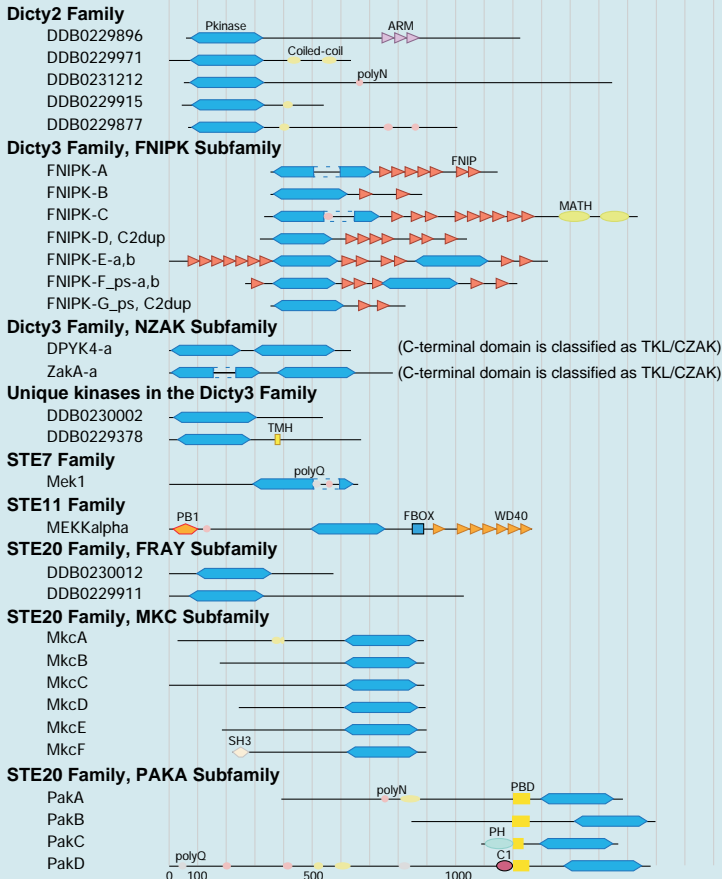

**STE20 Family, PAKL Subfamily**

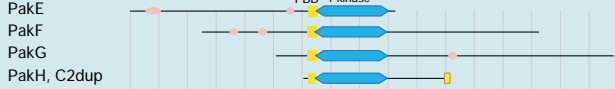

**STE20 Family, MST Subfamily**

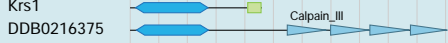

**STE20 Family, YSK Subfamily**

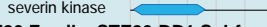

**STE20 Family, STE20-DD1 Subfamily**

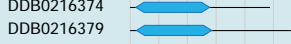

**STE20 Family, Unique Kinases**

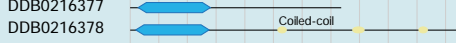

**Unique kinases in the STE Group**

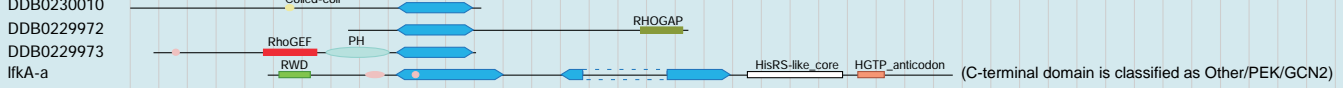

**TKL GROUP**

**ARMK Family**

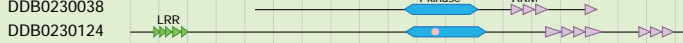

**ARK Family**

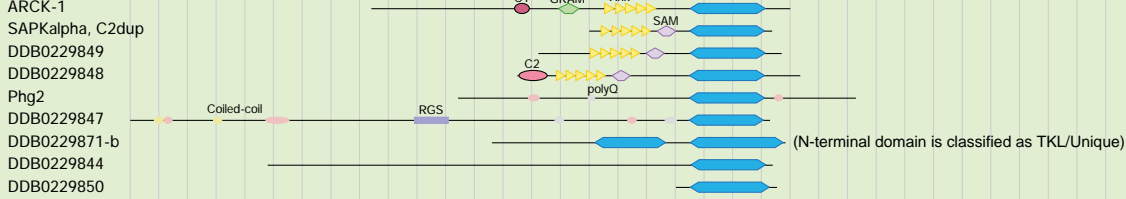

**CZAK Family**

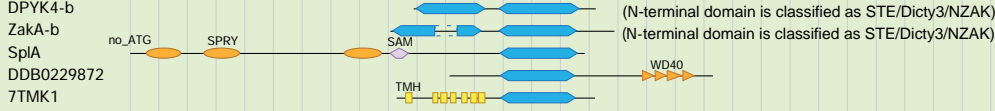

**Dicty4 Family, DRK Subfamily**

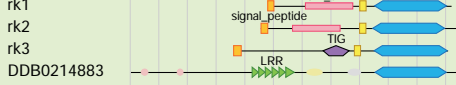

**Dicty4 Family, SHK Subfamily**

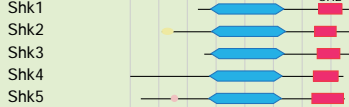

**Unique kinases in the Dicty4 Family**

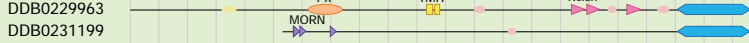

**Dicty5 Family**

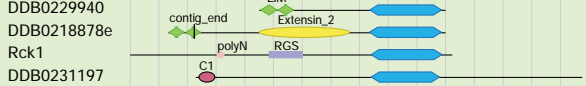

**DPYK Family**

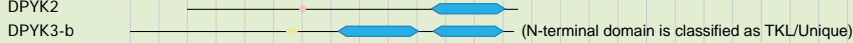

**Gdt Family**

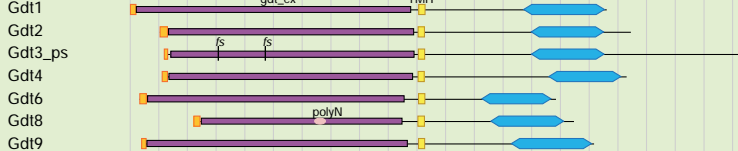

**LISK Family, LISK-DD1 Subfamily**

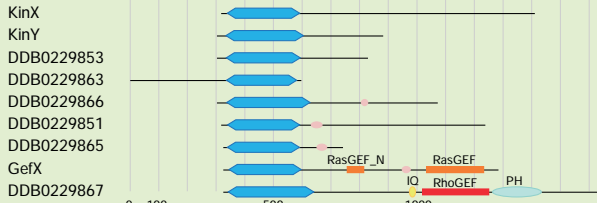

0 100 500 1000 2000 3000 4000 4600

**MLK Family, HH498 Subfamily**

DDB0230019

**ROCO Family**

GbpC  
pats1  
qkgA, C2dup  
Roco4  
Roco5  
Roco6  
Roco7  
Roco8  
Roco9  
Roco10  
Roco11

**Unique kinases in the TKL Group**

DPYK3-a  
DDB0229956  
DDB0229957  
DDB0220138  
DDB0220436  
DDB0230133  
DDB0229871-a  
DDB0229955  
DDB0230119ps

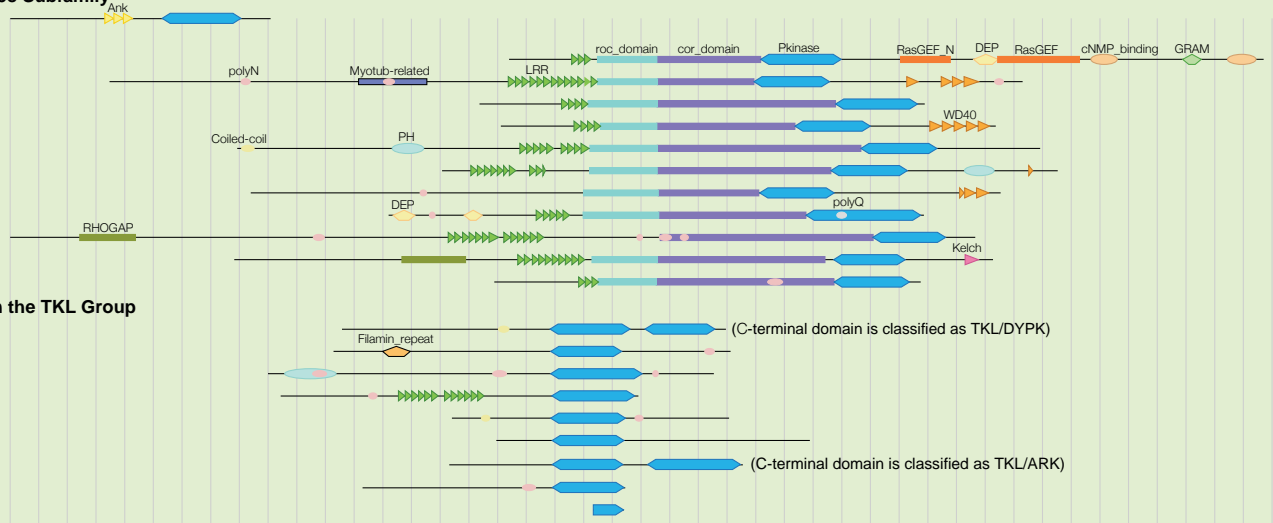

**OTHER GROUP**

**AUR Family**

Aurora

**BUB Family**

Bub1

**BUD32 Family**

Bud32

**CAMKK Family, Meta Subfamily**

DDB0220010

**CDC7 Family**

Cdc7

**Dicty6 Family**

DDB0231196  
DDB0229339  
DDB0204413ps

**Dicty7 Family**

DDB0231195  
DDB0229335

**Dicty8 Family**

DDB0216331  
DDB0229344

**Dicty9 Family**

DDB0231281-a,b  
DDB0219988-a,b  
DDB0230037-a,b

**Dicty10 Family**

DDB0204911e  
DDB0230125  
DDB0231304ps  
DDB0204909ps  
DDB0187322ps

**Haspin Family**

DDB0231182

**IKS Family**

IksA

**IRE Family**

IreA  
IriA  
IriB, C2dup  
IriC  
IriD  
IriE  
IriF, C2dup

**NAK Family**

DDB0229350  
DDB0216373  
DDB0229347

**NEK Family**

Nek2  
Nek3  
Nek4  
DDB0229345

**PEK Family, PEK Subfamily**

DDB0220611e  
DDB0229432

**Unique kinase in the PEK Family**

DDB0220652

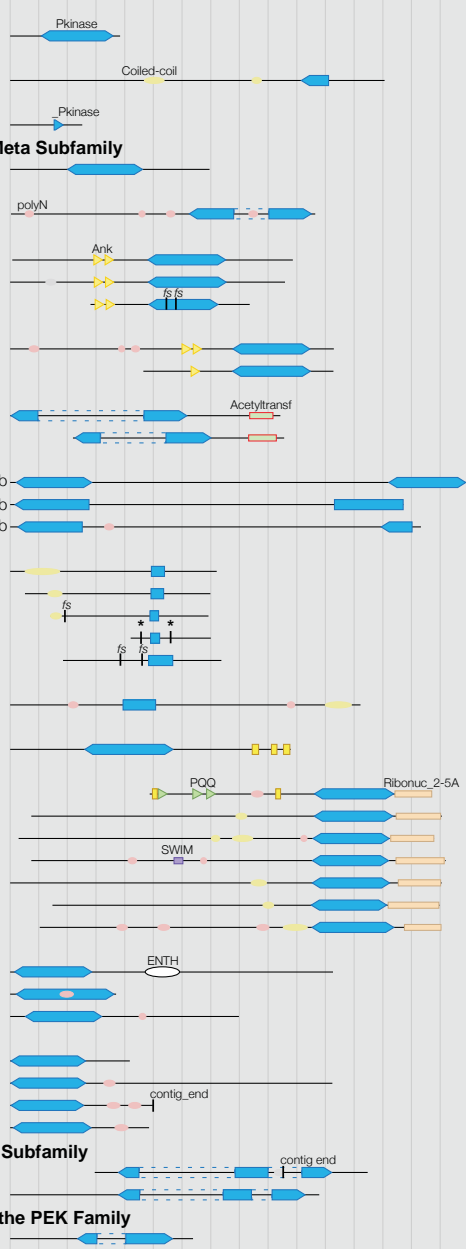

### PEK Family, GCN2 Subfamily

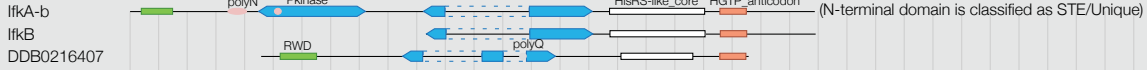

### PLK Family

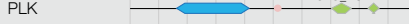

### SAMK Family

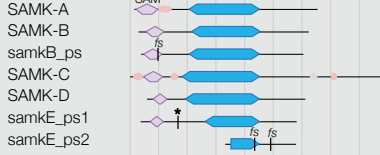

### SCY1 Family

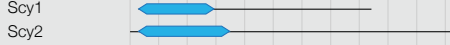

### SLOB Family

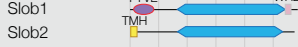

### TBCK Family

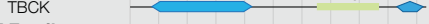

### TTK Family

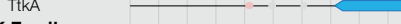

### ULK Family

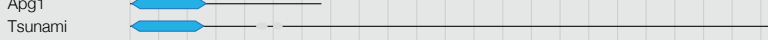

### VPS15 Family

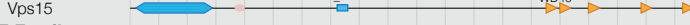

### WEE Family

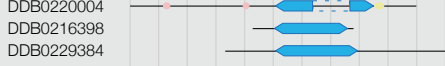

### Unique kinases

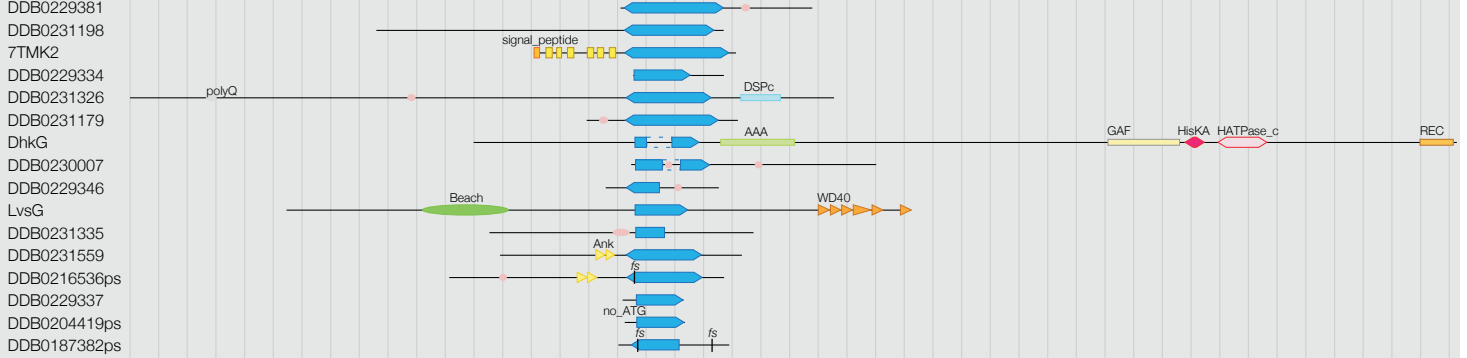

### ATYPICAL GROUP

#### ABC1 Family, ABC1-A Subfamily

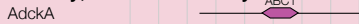

#### ABC1 Family, ABC1-B Subfamily

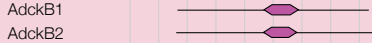

#### ABC1 Family, ABC1-C Subfamily

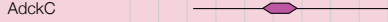

### AFK Family

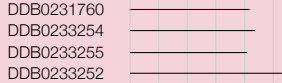

### Alpha Kinase Family, MHCK Subfamily

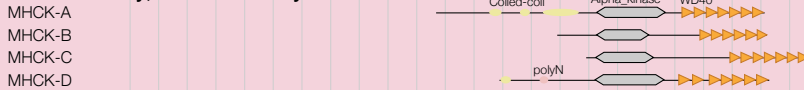

### Alpha Kinase Family, Unique Kinases

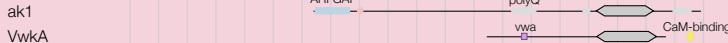

### BRD Family

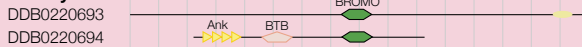

### G11 Family

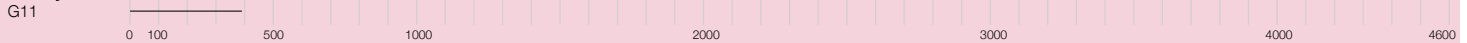

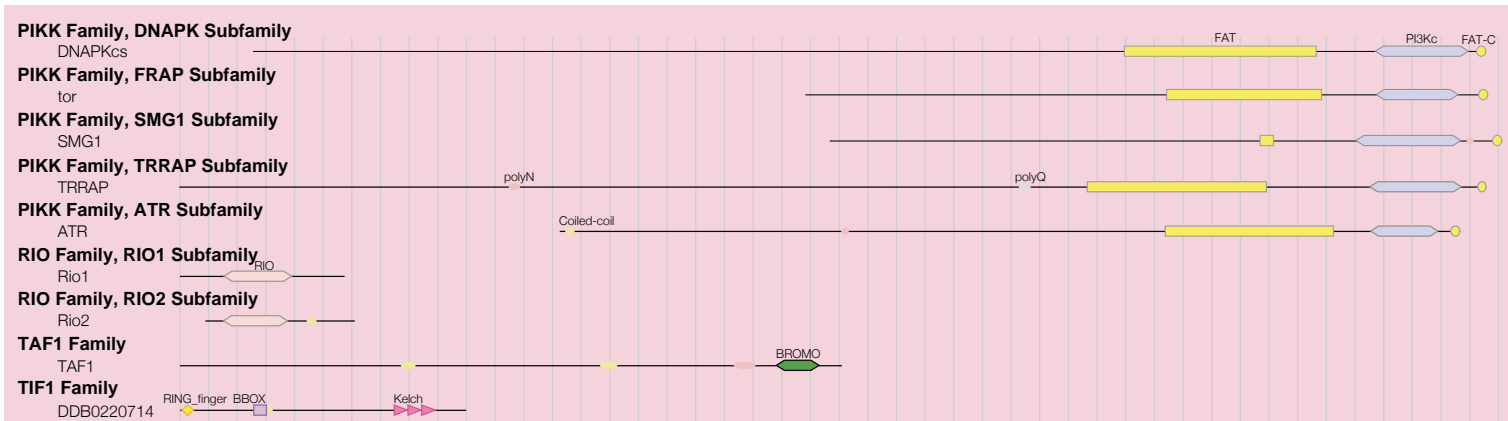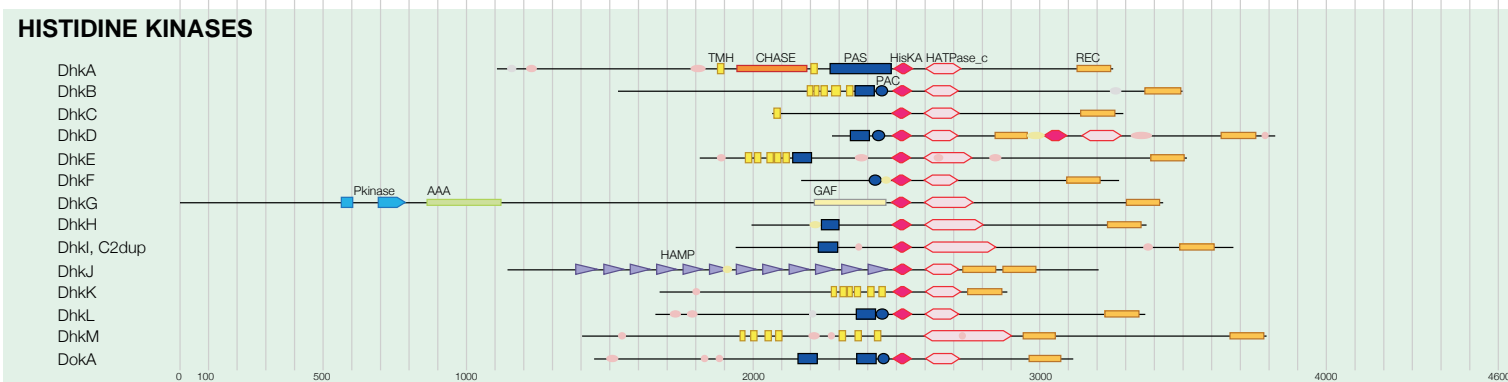

# LEGEND

## KINASE CATALYTIC DOMAINS

|                                                                                  |                                                                                                                          |
|----------------------------------------------------------------------------------|--------------------------------------------------------------------------------------------------------------------------|
|  | <b>Pkinase</b> Eukaryotic protein kinase (ePK) catalytic domain. Members phosphorylate serine/threonine and/or tyrosine. |
|  | <b>Pkinase_C</b> Domain found downstream of many ePK domains from the AGC Group.                                         |
|  | <b>ADF</b> Actin Depolymerization Factor. Severs actin filaments and binds to actin monomers.                            |
|  | <b>ABC1</b> Named for ABC1 from yeast, and is unrelated to the ABC transporter proteins.                                 |
|  | <b>PI3Kc</b> Phosphoinositide 3-kinase isoforms include lipid kinases and protein kinases.                               |
|  | <b>Alpha_kinase</b> A novel protein kinase catalytic domain with a related structure, but no sequence homology, to ePKs. |
|  | <b>RIO</b> Domain found in eukaryotes and prokaryotes that is related to ePKs.                                           |
|  | <b>BROMO</b> May be involved in protein-protein interactions in transcriptional activation complexes.                    |
|  | <b>HATPase_c</b> Domain found in several ATP-binding proteins, including histidine kinases.                              |
|  | <b>HisKA</b> Dimerisation and phosphoacceptor domain of histidine kinases.                                               |

## EXTRACELLULAR DOMAINS

|                                                                                  |                                                                                                                                                                |
|----------------------------------------------------------------------------------|----------------------------------------------------------------------------------------------------------------------------------------------------------------|
|  | <b>CHASE</b> Domain found in the extracellular portion of receptor-like proteins and is predicted to be a ligand binding domain.                               |
|  | <b>gdt_ex</b> Extracellular domain found in <i>Dictyostelium</i> GDT proteins.                                                                                 |
|  | <b>drk_ex</b> Extracellular domain found in two <i>Dictyostelium</i> protein kinases.                                                                          |
|  | <b>TIG</b> Domain found in cell surface receptors such as Met and Ron, as well as in intracellular transcription factors, where it is involved in DNA binding. |

## DOMAINS INVOLVED IN G-PROTEIN SIGNALING

|                                                                                    |                                                                                                                          |
|------------------------------------------------------------------------------------|--------------------------------------------------------------------------------------------------------------------------|
|    | <b>ARFGAP</b> Putative zinc fingers with GTPase activating proteins (GAPs) towards the small GTPase Arf.                 |
|    | <b>RHOGAP</b> GTPase activator proteins towards Rho/Rac/Cdc42-like small GTPases.                                        |
|    | <b>TBC</b> Thought to be a GTPase activator of Rab-like small GTPases.                                                   |
|    | <b>RasGEF_N</b> Found N-terminal to the RasGEF domain in several exchange factors for Ras-like small GTPase.             |
|    | <b>RasGEF</b> Guanine nucleotide exchange factor for Ras-like small GTPases.                                             |
|  | <b>RhoGEF</b> Guanine nucleotide exchange factor for Rho/Rac/Cdc42-like GTPases.                                         |
|  | <b>RGS</b> Regulator of G Protein Signalling. Promotes GTP hydrolysis by the alpha subunit of heterotrimeric G proteins. |
|  | <b>roc_domain</b> Ras-like domain of complex proteins.                                                                   |
|  | <b>cor_domain</b> Domain found C-terminal of roc_domain.                                                                 |
|  | <b>PBD</b> Domain that binds Cdc42p- and/or Rho-like small GTPases.                                                      |

## SECOND-MESSENGER-BINDING DOMAINS

|                                                                                    |                                                                                                                                     |
|------------------------------------------------------------------------------------|-------------------------------------------------------------------------------------------------------------------------------------|
|  | <b>CaM-binding?</b> Putative Ca <sup>2+</sup> /calmodulin binding domain.                                                           |
|  | <b>IQ</b> Ca <sup>2+</sup> -independent calmodulin binding domain.                                                                  |
|  | <b>cNMP_binding</b> cAMP or cGMP binding site.                                                                                      |
|  | <b>PH</b> Pleckstrin Homology. Binds inositol phosphates, and various proteins.                                                     |
|  | <b>PX</b> Phox domain. Phosphoinositide-binding modules with varying lipid-binding specificities.                                   |
|  | <b>FYVE</b> Fab1, YOTB/ZK632.12, Vac1, and EEA1. Zn <sup>2+</sup> -binding; binds PtdIns(3)P.                                       |
|  | <b>C1</b> Zn <sup>2+</sup> -binding domain that may bind to molecules such as diacylglycerol and phorbol esters.                    |
|  | <b>C2</b> Ca <sup>2+</sup> -binding motifs that appears to bind phospholipids, inositol polyphosphates, and intracellular proteins. |

## REPEATED DOMAINS

|                                                                                    |                                                                                                                                                                       |
|------------------------------------------------------------------------------------|-----------------------------------------------------------------------------------------------------------------------------------------------------------------------|
|  | <b>Ank</b> Ankyrin repeats are usually involved in protein-protein interactions.                                                                                      |
|  | <b>ARM</b> Armadillo repeats mediate protein-protein interactions.                                                                                                    |
|  | <b>PQQ</b> Domain found in several enzymes which utilise pyrrolo-quinoline quinone as a prosthetic group. Function is unknown.                                        |
|  | <b>Calpain_III</b> The function of domain III of calpains is unknown.                                                                                                 |
|  | <b>WD40</b> Named for their ~40 aa length, and because they often terminate in a WD dipeptide. Mediate protein-protein interactions, including to Gβ and myosin II.   |
|  | <b>FNIP</b> Named after the pattern of conserved residues. Found only <i>Dictyostelium</i> .                                                                          |
|  | <b>HAMP</b> Named for four of the proteins it is found in: histidine kinases, adenylyl cyclases, methyl binding proteins and phosphatases.                            |
|  | <b>Kelch</b> Named after the protein in which it was first identified. Its function is unknown.                                                                       |
|  | <b>LIM</b> Named after Lin-11 Isl-1 Mec-3. Binds two Zn <sup>2+</sup> ; mediates protein-protein interactions.                                                        |
|  | <b>LRR</b> Leucine-rich repeats provide a versatile structural framework for the formation of protein-protein interactions.                                           |
|  | <b>MORN</b> "Membrane Occupation and Recognition Nexus". Function is unknown.                                                                                         |
|  | <b>RCC1</b> Repeated domain found in regulator of chromosome condensation (RCC). Binds to chromatin and acts as a guanine-nucleotide dissociation stimulator for Ran. |

## STRUCTURAL MOTIFS

|                                                                                   |                                                                                     |
|-----------------------------------------------------------------------------------|-------------------------------------------------------------------------------------|
|   | <b>polyN</b> Regions at least 19 aa in length that are at least 90% asparagine.     |
|  | <b>polyQ</b> Regions at least 19 aa in length that are at least 90% glutamine.      |
|  | <b>Coiled-coil</b> Regions predicted to dimerize by forming parallel alpha-helices. |
|  | <b>signal_peptide</b>                                                               |
|  | <b>TMH</b> Transmembrane helix.                                                     |

## OTHER CATALYTIC DOMAINS

|                                                                                   |                                                                                                                                                                     |
|-----------------------------------------------------------------------------------|---------------------------------------------------------------------------------------------------------------------------------------------------------------------|
|  | <b>AAA</b> ATPase family associated with various activities. Often found in proteins with chaperone-like functions.                                                 |
|  | <b>Acetyltransf</b> Gcn2-related N-acetyltransferase. A superfamily that includes histone acetylases and other acetyltransferase enzymes.                           |
|  | <b>HECT</b> Homologous to the E6-AP Carboxyl Terminus. E3 ubiquitin-protein ligase.                                                                                 |
|  | <b>tRNA-synt_2b</b> tRNA synthetase class II core domain. tRNA synthetases catalyse the attachment of an amino acid to its cognate tRNA.                            |
|  | <b>Myotub-related</b> Domain in myotubularin-related proteins. Myotubularin is a lipid phosphatase that dephosphorylates PtdIns(3)P and PtdIns(3,5)P <sub>2</sub> . |
|  | <b>DSPc</b> Dual-specificity (Ser/Thr and Tyr) protein phosphatases.                                                                                                |
|  | <b>Ribonuc_2-5A</b> An endoribonuclease that cleaves an intron from Hac1 mRNA in humans, which causing it to be more efficiently translated.                        |

## PHOSPHOAMINO ACID-BINDING DOMAINS

|                                                                                   |                                                                                                                                       |
|-----------------------------------------------------------------------------------|---------------------------------------------------------------------------------------------------------------------------------------|
|  | <b>SH2</b> Src homology 2. Binds phosphotyrosine-containing polypeptides                                                              |
|  | <b>FHA</b> Forkhead-associated. Binds phosphopeptides. Highest specificity for phosphothreonine, but also recognises phosphotyrosine. |

## DOMAINS MEDIATING PROTEIN-PROTEIN INTERACTIONS

|                                                                                     |                                                                                                                                                                        |
|-------------------------------------------------------------------------------------|------------------------------------------------------------------------------------------------------------------------------------------------------------------------|
|    | <b>BTB</b> BR-C, ttk and bab. Mediates homomeric, and in some instances heteromeric, dimerization.                                                                     |
|    | <b>FBOX</b> A motif found in cyclin-F. Serves as a link between a target protein and a ubiquitin-conjugating enzyme.                                                   |
|    | <b>Filamin_repeat</b> These form a rod-like structure in filamin, which is an actin-binding protein.                                                                   |
|    | <b>SH3</b> Src homology 3. Binds to target proteins through sequences containing proline and hydrophobic amino acids.                                                  |
|    | <b>PB1</b> Phox and Bem1p domain. This is present in many eukaryotic cytoplasmic signalling proteins. Forms heterodimers.                                              |
|    | <b>mob_binding</b> Binding site for Mob1. NDR Family kinases are activated by Mob1 binding.                                                                            |
|    | <b>Rhodanese</b> Rhodanese is a sulfuryltransferase with two Rhodanese domains. Inactive versions are found in dual specificity phosphatases and ubiquitin hydrolases. |
|    | <b>RING_finger</b> A specialised type of Zn-finger. It probably mediates protein-protein interactions and probably has E3 ubiquitin-protein ligase activity.           |
|   | <b>DEP</b> dishevelled, Egl-10, and pleckstrinproteins. Unknown function.                                                                                              |
|  | <b>SAM</b> Sterile Alpha Motif. Form homo- and hetero-oligomers. Also bind to non-SAM domain-containing proteins with a low affinity constant, and appear to bind RNA. |
|  | <b>SARAH</b> Sav/Rassf/Hpo - 3 classes of eukaryotic tumour suppressors that it is found in. Mediates homodimerization.                                                |
|  | <b>WH2</b> Wiskott Aldrich syndrome homology region 2. Mediates actin-binding.                                                                                         |
|  | <b>POLO_BOX</b> Found in Polo kinases. Mediates interaction with multiple proteins, some of which are substrates.                                                      |

## OTHER FUNCTIONS

|                                                                                     |                                                                                                                                                  |
|-------------------------------------------------------------------------------------|--------------------------------------------------------------------------------------------------------------------------------------------------|
|  | <b>HGTP_anticonodon</b> Found in Histidyl, Glycyl, Threonyl and Prolyl tRNA synthetases. It is probably the anticodon binding domain.            |
|  | <b>PAC</b> Occurs C-terminal to a subset of PAS motifs, and is proposed to contribute to the PAS domain fold.                                    |
|  | <b>PAS</b> Found in Per, Arnt, Sim. Mediate protein-protein interactions, dimerization, and sensory functions such as detecting light and redox. |
|  | <b>REC</b> Receiver domain. Contains a phosphoacceptor site that is phosphorylated by histidine kinases.                                         |

## UNKNOWN FUNCTION

|                                                                                     |                                                                                                                                                                                   |
|-------------------------------------------------------------------------------------|-----------------------------------------------------------------------------------------------------------------------------------------------------------------------------------|
|  | <b>BBOX</b> Zn finger. Found in transcription factors, ribonucleoproteins and proto-oncogenes, but no function is clearly assigned to this domain.                                |
|  | <b>SWIM</b> Zn-finger.                                                                                                                                                            |
|  | <b>Beach</b> Found in the BEIGE and CHS protein. The function is unknown. Usually followed by WD repeats.                                                                         |
|  | <b>RWD</b> Found in proteins containing Ring finger and WD40 repeat domains.                                                                                                      |
|  | <b>Extensin_2</b> Homologous hydroxyproline-rich glycoproteins (HRGPs) found in the plant extracellular matrix.                                                                   |
|  | <b>ENTH</b> Epsin N-terminal homology. Found in proteins involved in endocytosis and cytoskeletal machinery. May bind PtdIns(4,5)P <sub>2</sub> and PtdIns(1,4,5)P <sub>3</sub> . |
|  | <b>FAT</b> FRAP, ATM and TRRAP. Present in the PIK-related protein kinases.                                                                                                       |
|  | <b>FAT-C</b> Found at the C-terminal end of the PIK-related protein kinases.                                                                                                      |
|  | <b>GAF</b> Found in phytochromes and cGMP phosphodiesterases (PDEs). In PDEs, it forms an allosteric cGMP binding site.                                                           |
|  | <b>KA1</b> Found in the C-terminal extremity of kinases in the MARK subfamily.                                                                                                    |
|  | <b>GRAM</b> Found in glucosyltransferases, myotubularins and other putative membrane-associated proteins.                                                                         |
|  | <b>HEAT_REPEAT</b> Found in Huntingtin, EF3, PP2A regulatory subunit, and yeast TOR1. Related to armadillo repeats.                                                               |
|  | <b>MATH</b> Meprip And TRAF-Homology. TRAFs are intracellular proteins, and mepripins are extracellular.                                                                          |
|  | <b>UBA</b> Ubiquitin associated domain. Found in several proteins having connections to the ubiquitination pathway.                                                               |
|  | <b>SPRY</b> Found in SpIA and Ryanodine Receptor.                                                                                                                                 |
|  | <b>vwa</b> von Willebrand factor type A. VWA domains in extracellular eukaryotic proteins mediate adhesion. Their function in intracellular proteins is unknown.                  |
