# Supplementary material for: The Dictyostelium Kinome—Analysis of the Protein Kinases from a Simple Model Organism
Source: PLOS journal article supplement (doi:10.1371/journal.pgen.0020038), 2006-03-28
Supplement: S1 (10.1371/journal.pgen.0020038.s001) [file journal.pgen.0020038.s001]

|            |      | Subdomain I      | Subdomain II | Subdomain III | Subdomain IV                             |                 |
|------------|------|------------------|--------------|---------------|------------------------------------------|-----------------|
| Akt1       | 120  | FELLNLVCGKGSFGKV | IQVRRKDDTGE  | VYAMKVLSSK    | HIVEHNEVEHTLSEKNTLQKIN                   | HPFLVNLNYSFO    |
| DDB0220670 | 173  | FIFLRMTGRGAFGOV  | NIYVKKIDITGR | LYAMKVIKKD    | KCLNMNAVGHFTTERKLLKYY                    | HPFIVGLKYSFO    |
| DDB0216386 | 86   | YFIFKPTSKGGYGOV  | FLAITKSN.K   | FFAIKLSINKR   | DTIGKHMVKELMVERNIVQYO                    | NQSIKVLFEFCFO   |
| DDB0220701 | 1527 | FEIIKPTSRGAFGRV  | YLAQKKKTGD   | LYAIKVLKLL    | DTIRKNMVNIVIVERNILAMVO                   | NEFVVKLIFYAFO   |
| DDB0220700 | 64   | FNFLKVIKSGCGFGKV | YLAENKITTKK  | TYAIKVLKKS    | DTIKKMMVDQVNIKETTISNYK                   | CNFIVLELSSFO    |
| DDB0185113 | 810  | FEFIKPTKGGYGV    | FLAKKIRTGD   | IYAIKRLKKS    | DMIKKNQLDVKVERNILAYTS                    | NEFVVKMYYSFO    |
| DDB0229452 | 232  | YKHVECTKGGYGV    | CKFINKKTNE   | IRAIKTIKRD    | YALKEINTKELG                             | GOFTVNIHFHTFL   |
| NdrA       | 112  | FEVIRITGRGAFGEV  | SIIVRHRESNE  | LYAMKRLKKS    | EMLKKEQAAHVRAERDVILASAN                  | TNWVVVLYYSFO    |
| NdrB       | 130  | FESIRITGRGAFGEV  | RIIVKMKKNNK  | FFAMKLLDKS    | KMIEKHQTIIVRSERDILADSNNI                 | HGSNFWIVSILYSFO |
| NdrC       | 718  | FKILTOIGKGGFGOV  | FLAOKKDDTGD  | IVTLKRLKKO    | TVEWANQRNOVSQEKSVML.VD                   | NKWITKLLYSFO    |
| NdrD       | 1555 | FQKLTAICKCGFGKV  | YLARKKDSNE   | IVTLKVIKKS    | TYHRANQMTSVTKEKEVMMIPHSSK                | DQSOWITRLLYSFH  |
| DDB0231558 | 756  | FTLIEKIGEGGFGOV  | FLAKKDDTGE   | IYAIKRRMSKE   | LLWSKNVSHLTKNERDILAQGKN                  | HRWIVSILVYSFO   |
| DDB0216387 | 40   | YDIISTIGSGSYGEV  | CIIVREKSTKO  | VYAMKLIYTT    | EVSDTLVKKRALRERDAMVICNNKN                | NKRAPKLYCSFID   |
| Pdk1A      | 69   | FIIIGKVLGEGSYGAV | VIQTEKETQQ   | QYAIKILKKE    | QIITKENKIKYVQIEKEIFCKSN                  | HPNTIKLFFTFR    |
| Pdk1B      | 271  | FDIFIRITGKGGYGV  | KLIVIEKETQL  | IFASKILNKK    | LIIEKKAQYVNTKETTIDSLD                    | NPNIKLEFVTFFO   |
| PKA        | 336  | FKQIRVICTGTFGKV  | YLIQNTKDCG   | YVAMKLNKA     | YVVQLKQVEHLNSEKSLSSIH                    | HPFIVNLQYAFQ    |
| pk4        | 679  | FKFLDLGSGSFAKV   | RLICQHIPSER  | LFCMKLNLON    | KIIRLROEVHVINEKQVIMLTD                   | NPFIKLYSTFK     |
| DDB0185224 | 334  | FNFYGSLGSGSFGTA  | KLICRHRGSL   | FFCSKTLRRE    | TIVHEKHKEVNNENINMLNIS                    | HPYIVKTYSTFN    |
| pk2        | 153  | FELLNVIKCGSFGKV  | MOVKKKGEDK   | IFAMKVLKRD    | AIIARKQVNHKTKSEKTIQOCIS                  | HPFIVNLHYAFO    |
| DDB0220702 | 128  | FIIKHLVCKCGFGKV  | FOVVHVDIQK   | VYAIKVLKKN    | HIIAKKSVVNTLAEKDTIKKIS                   | HPFIVNLHYAFO    |
| pk3        | 498  | FELLKVLGSGSFGKV  | YIVRRKDDTGG  | FYAMKVLNKK    | DMLKKKQIATNTNEKMLVSTMD                   | HPFIVRLEHFAFO   |
| Aurora     | 110  | FDIGKLLGMRFGHV   | YIAREKKSQF   | IYAIKVLKFN    | QLOTHNIEHQLRREIEIQSHLR                   | HPNILLRIFGYFY   |
| MLCK-A     | 8    | YFKEEITGRGAFSIV  | YIIGENKOTKO  | RYAIKILNKS    | ELGDKYEKNLKMVEDILKKNV                    | HPNITAIKELFD    |
| DDB0216385 | 13   | YNITDITGECTFTSTV | TLANHIEKIE   | DKYAIKILISKE  | VLDNERTYVDWETSILSKCO                     | HPNITIKFYBHYE   |
| DDB0216309 | 38   | YILGNETGRGAFSIV  | REATSRATCT   | KVAIKLSINTR   | FIKNKLLMREIEIMKQVGD                      | HPNITIKLEYEVE   |
| pXi        | 18   | YEIGSOIGNGKFAOV  | HSGTNNKSTGK  | KSAIKIMKKS    | IVEESAIKIEIEMMTEIN                       | HONITIKLOEYVE   |
| DDB0216308 | 20   | YEFGPEITGRGAFSIV | ROCTHKDDTGD  | QVAIKATSQO    | HVSEADMKRFRTREIETMKLKL                   | HPNITIKLOEYVDF  |
| DDB0229351 | 566  | YQIFDRIGSGTFSDV  | YICINKENK    | QYAMKLIIDKS   | LVTMIAOHTDMKVETEVNLIKOSF                 | HPHVIQIIDLHFE   |
| DDB0216307 | 56   | YVVGKELGRCGAFSV  | RECTRKTTSD   | KVALKYIEKK    | FVKKKHIEQLRREIDIMKVKV                    | HENVLSIKKEIFE   |
| DDB0216312 | 6    | YELHKEITCKGAFSV  | FIVTEKTKKK   | QWAMKIIDKK    | SSSKAALETEIEMKVD                         | HPNITIKMHEYFE   |
| Snf1       | 31   | YRLDKTIGIGSFGKV  | KLAEHIRTGV   | KVAIKILNRT    | KIKNLKMDKIRREIQNMKLF                     | HPHITIKLEYEVE   |
| DDB0229364 | 9    | FIIIGKTLGOGTTGKV | KLGFHKDDTGF  | KVGIKILNKE    | LLINKPSMRKIEREIVLMKLLD                   | HPNAMKMYEVE     |
| Lkb1       | 40   | YILGEVLGECAYGKV  | KDCMDSFTQK   | RVAVKILKRA    | RLKKIPGGEASVLKEINTTKLKH                  | NKHTIKLIDHFI    |
| MARK-A     | 109  | YLVIKTITGRGQFGKV | KLGYHKKIPN   | EKVAIKILNKG   | KLDPETLKMVQREVRIMKLLH                    | HPNITIKLEYEVE   |
| MARK-B     | 65   | YLLGKTIIGSGTSSKV | KIGTNIITGK   | QYAIKITKPK    | RIKERKEIEREISILKRLK                      | HDNITIKLHDAIY   |
| MARK-C     | 46   | YEVGKTLGNGTFFGKV | KLGTNICITKE  | NVAIKILKNN    | KLSGKQKETCFREIDIMKLLD                    | HPNITIKLDDVVD   |
| DDB0231454 | 542  | YTLGKTLGRCGNYGV  | KLGTHTINTKE  | EIAIKILYKE    | QMTSEFTRCREIEILKOLY                      | HPFINKLNLVLE    |
| DDB0219986 | 1158 | YDIIKTISTHPHN.V  | YLANFNDO     | LIVLKEFGIG    | DAFGKQIFEROVSLKQMN                       | HKCIMPQAVFY     |
| FHAK-A     | 180  | YDFIKELGSGNFSV   | YECVNNKTK    | RYAIKHLNLS    | KINTHTPKFKSQLNREIETLKFIN                 | HENVVEIYDIFY    |
| FHAK-B     | 625  | YFVFKELGSGGYGIV  | YEGLYKLNK    | RYAIKHTDLL    | KNGSTSKMELVSKYNAIKNIK                    | HRNVTEFFDIVF    |
| FHAK-C     | 199  | YSIQGILGTGNFSV   | KRCIRRDITGE  | VFAVKIIDKK    | KFWSQTKTRROMESEVEIQKIK                   | HPNITISIIDIVO   |
| FHAK-D     | 218  | YDLREVLGTCNFASV  | RLGVEKETGN   | VYAIKIIDKK    | KMSQTKRSDSLMDEVNVLKVKV                   | HONITISIKVEFE   |
| FHAK-E     | 145  | YFIGEMLGCGNFATV  | KLAVERTTGV   | KYAVKIVDKK    | KYFMNSSARKDSLMDDEVNLRGLS                 | HPNITIKLVEFE    |
| DDB0220010 | 201  | YVFVRKLCGKTFGKV  | KLAYHHDTHH   | LYAIKIVNKI    | RLKKQTMGIGRPNAFDDVLKEIIMKMN              | HPNITIKLVEVIN   |
| Apq1       | 7    | YILDKRICWGAFAOV  | YKCFSIKTNE   | PFAIKVVDVC    | RLADKNKSLTENLNYEIRILKELS                 | HTNITRILYDVLN   |
| tsunami    | 5    | YKLIQIGEGSFGKV   | YKYRKKFTGQ   | LVACKVLSKK    | GKNEEDILSLRQEIDILKNS                     | HPNITIKLVEVIN   |
| Cdk1       | 10   | YQKLEKLGEGTYGKV  | YKAKEKATGR   | MVALKKIRLE    | DDGVPSTALREISLKEVP                       | HPNVVSLFVDVLH   |
| Cdk5       | 4    | YKIEKELGEGTYGIV  | YKAKNRETGE   | IYAIKRIIRD    | SEDEGPCTAIREISLKEIK                      | HPNITIKLHDVH    |
| Cdk7       | 4    | YNIEALGEGTYGVV   | SRATVKATGO   | IYAIKIRIKI    | LIQNOTDDGINFSAIREIKIQELK                 | HDNVNLLDIFA     |
| Cdk8       | 44   | YTFSYELGSGTYGMV  | YKADDKRPN    | NKVAVKKFRST   | KEGEGLSLTAYREIIGLEKELS                   | NENIVKLLDVCL    |
| Cdk9       | 209  | HEKTEOIGEGTFFGOV | YKAKNKNSGD   | IYAIKVVIMD    | NEVEGPITAIREIKIKELN                      | HANVNVKQEVVT    |
| Cdk10      | 7    | FEKLDSTGEGTYGIV  | SKGRDKETGR   | IYAIKVKVIG    | QODKDGIPLTSLREIQLEIK                     | HPNITIKLVEVI    |
| Cdk11      | 52   | FKKLYTINEGAFGVV  | YCAQDKETEE   | IYAIKVIKME    | REREGIPITSVREIKVMEIK                     | HDNIVQKIEIVL    |
| DDB0229294 | 64   | YEIISKIGEGISGSV  | FKAIKKGTTE   | MVALKNFKGW    | TEGDRASKEECSLQQLR                        | HIPYITPVIDIY    |
| DDB0229424 | 4    | YQIIEELGSGSYGKV  | YKAIHNLKSK   | TVAIKILISMV   | NIENGLPVEVKYIMKLRD                       | CKNITVHLEBYFY   |
| DDB0230050 | 4    | YIILSKCGGTYGSV   | FKGIHKITHS   | LYAIKRVTDI    | AQEDGEPVEVKYINOLKN                       | LSNIVNIRDHFI    |
| CK2        | 47   | YEIIRKITGRGKYSEV | FEGANIKNNE   | KCVIKVLKPV    | KKKKIKREIKIIONLQCG                       | GNPNIITVYDVVR   |
| DDB0219953 | 312  | YEVIOKLCGRKYSEV  | FSGDIEITSD   | EYVIKVLKPV    | QKLIQREIKIESLNG                          | GNPNIITVYDVSVK  |
| ClkA       | 590  | YKVLCTVCGSFTSTV  | VECWDTNSSG   | QYAIKIVRSR    | KKYTEDALVEIDILRNLEKGTGNSNGKYLSHCIRLIDSLF | GKHISTQOSIFK    |
| DDB0229841 | 74   | IDPNTIVDCGTNGIM  | FIAFNFDIQK   | RYAIKILKSK    | MFDNENLGHRIIRNLIFQNLFOG                  | HPFVSGFKVSKR    |
| DDB0229333 | 46   | ITTKTIYACDINGTM  | FQTYNMDINR   | LLIHKISLL     | QFKNHLQGRMILRNCHYORFFNH                  | HPPLVSTFQSVFK   |
| DDB0229296 | 102  | INLKSITDCGPDGVM  | FRAKNEDSKE   | EYVIKISVF     | LMKDDKMARKLLRNLLFORHFOQ                  | HPPLVSTFQSVFK   |
| Dyrk1      | 304  | FEIISIKGGSFGKV   | VKAFDSVLKE   | VYAIKIKIKN    | VPFYNOALTEIRLELMNNKD                     | PEDQYKIIKIKHHFK |
| Dyrk2      | 605  | FEIVSILGCGSFCOV  | VKGYDYKTGE   | MVALKILRNQ    | KRFHNOALTEIKLLEYIKTND                    | PNSTASIVIKKHHFY |

|             | Subdomain I  | Subdomain II  | Subdomain III       | Subdomain IV   |                             |                 |
|-------------|--------------|---------------|---------------------|----------------|-----------------------------|-----------------|
| Yaka        | 205 YKVLDSI  | CGTFFGOV      | VKCKNCDTDE          | LVAIKILKNK     | QAYFQOGRLEIOTIKSINDOHD      | PEDKNHILRLDLSFI |
| Prpf4B      | 490 YQIFSP   | IGSIVFSTV     | VSAKETKTNE          | DVVIKLIIRNR    | PSMHRSGLKEIETLQKISNTPTS     | SNQKSHCIOMKDFHN |
| GSK-3       | 56 YITEGVI   | IGNGSFGV      | TOAIVADTKE          | VVAIKKVLQD     | QRYKNRELQIMKMLN             | HINIVSLIKNSFY   |
| GlaA        | 91 YEIIKOV   | CGGTFFGV      | YBAKNQDNKR          | VAIKKVEKS      | NHFISREYDIKIVA              | HPNCLRLDMFY     |
| Erk1        | 149 YSIVKCI  | CHGAYGVV      | CSAKDNLTGE          | KVAIKKISKA     | FDNLKDPKRTLLRETHLRHF        | HENLISIKDILK    |
| Erk2        | 14 YEVLQVI   | CGKAYGIV      | WKAIDKKTQ           | TVAIKKIFDA     | FQNTADQARTFREIMFQELHG       | HENIILKLNVIK    |
| DDB0229430  | 4 YQFIKOV    | CGDGAAGDV     | IKAIDVKTGE          | IVAIKRMKK      | FSDWKECIOLREIKAKKIK         | HPNIVKLEIIL     |
| Sky1        | 135 YQVVDLK  | GWCHFSTV      | WLCNDKDTPTTSS (29)  | QVALKIVRSA     | RTYETAEDETIKLNASKY          | NAQDKCVARLDHFT  |
| DDB0230051  | 414 QIHKVS   | ICNGCGHFV     | IKLIPTVSGTNGV       | NSYSKFIYNS     | IYSSTLAESEILLFREAMLTKLN     | HNNILKLESITK    |
| DDB0230126  | 654 YHLGPL   | IENSTTV       | FRAFDCKSLI          | PVAIKVLPV      | ALNIPV                      | HENLTKVYQVCO    |
| Cdc7        | 622 YRILEK   | ICGCTFSGV     | VKSVCIDGPN          | GLIVALKRVAPT   | SSPARILNETHSILRVGG          | HYNVSAIFGALR    |
| DDB0229971  | 77 VISDIAI   | CKCAFATV      | FKGLNTLSGD          | FVAIKRFEKS     | KISNEQHSVSTEFDTLORLN        | HENIVRILCREE    |
| DDB0229896  | 18 YNLGVVI   | CKGGFGTV      | YOGLDIEDGD          | FVAIKQINLT     | KIPKDLQOGIMNEIDLKLN         | HANIVKILKYVK    |
| DDB0229877  | 13 YQIGEAV   | CKGAFGKV      | FKALNAETGD          | FCAIKQIEKT     | IISEKQLPSIOEIKLQTL          | HPNIVKFIESYE    |
| DDB0231212  | 22 YLLIDI    | CKCGFGV       | YKGLHKTGY           | FSAIKKIKIM     | KKKKLOSEQISLMAEINLKVLS      | HNNIVRYEHIP     |
| DDB0229915  | 36 YTLGKVI   | CKGAFGOV      | FKGLNGKTGE          | FVAIKQIDSN     | KIDESSLQSVKGEVETLHKL        | HNNIVKVLQVVE    |
| FNIPK-A     | 11 WEILSOL   | CKGAFGRV      | VKAKKINCDGTGI       | IIDICAIKIIKKS  | VFTKNEIETIKQLD              | HPLIVKYVYGYV    |
| FNIPK-B     | 11 WEIVETL   | CKSNV         | FKVNNKNNIVLNG       | NSFKTCILKIIINK | DKNVWKEGOVLEKLN             | IDSVIKYCWCC     |
| FNIPK-C     | 33 FEIIRIL   | CKKDEFTT      | CKAKKLSGQFNEK       | RVNFCILKIIKRR  | VKKFDSKKNIEIIEIDPRKERETEKIK | HICVLEIYGYSE    |
| FNIPK-D     | 33 WEIITOL   | CKSNEQFTV     | YMSKKLKGPNFTN       | NRFGLCTVKKIKSO | YFNEIENHILKLRD              | NKYVLYVYCGK     |
| FNIPK-Ea    | 368 WEIIK    | CKOFTFSGV     | YKSVCIDGPN          | GLIVALKRVAPT   | TKHNAKIDVLN                 | ICKSLKLYCVK     |
| FNIPK-Eb    | 860 WEIIST   | CKGNECKV      | FKARKINGIINGS       | KVSLCAIKKIEKK  | DKLKIKLSTEFETLKNLKD         | NEHSMKYVYGY     |
| DPYK4-a     | 9 WEEISST    | CKSNCSSRVK    | IKCRKKNGLIENE       | KVDIVAIKIIKKS  | FFKRNETDIEKIR               | LFNIPRYSHAE     |
| ZakA-a      | 9 WEEISST    | CKGQYGRV      | IKCRKKNFILNE        | QVDYVAIKIISKD  | FFKRNETDIEKIR               | LFNIPRYSHAE     |
| DDB0230002  | 16 IEKNYR    | CKGGFSKI      | SKAKKNGIINGTIVNKKMI | AIKKIKFD       | DKIQFNEVNNLELTKNKNK         | EMOISSIDYFG     |
| DDB0229378  | 31 WVIEROL   | CKSGSFGOV     | YKAHKKLDPN          | FVCAIKVLOYC    | KFTMKEVDYKKNL               | DPKFKVYVSLF     |
| Mek1        | 292 LKIIIRVL | CKRCAGGV      | KLAYHETSGT          | YIAIKVITLD     | IQENIRKQIILELKTTHKTS        | YPIYTSYDFADY    |
| MEKKalpha   | 495 WQKGQI   | CKGGYGSV      | YGLNKTDTGE          | LFVAIKOLEIV    | DINSDPKLKNMILSFSKIEVMRSLR   | HDNIVRVLCTSL    |
| DDB0229911  | 71 YELKETT   | CKGGSLV       | ORAIKLPFOE          | NVAIKIIDLE     | HCKNVLEETRKEIQAMSLCH        | HPNIVVAHSTFV    |
| DDB0230012  | 97 YNLIEPT   | CKECTEGRV     | FKAYCIPLKE          | NVAIKVVELD     | KMDPQFVKDVIVKVKVMNGN        | HPNLIHYSFSL     |
| MkcA        | 585 YTFREK   | CKGGFGTV      | YLVRRNMDKSK         | SRIAIKKLPHV    | RKKEKFFNVKEIRVLEFTN         | HPNIIITVYNSHM   |
| MkcB        | 438 YKNSDO   | CKGGFGTV      | YFAKSTKEKR          | LVAIKKMPHV     | TKROQQONFREAAIYAKCD         | HPNIVKLHTCHI    |
| MkcC        | 616 YKNDKQI  | CKSGFGSV      | FLAKSTVDKC          | EIAIKKIAHV     | SAKARTNLNETGFLNFKC          | HPNIVSLRSHL     |
| MkcD        | 369 FKNLDF   | CKGGFGSV      | FCAKNKNPHSAYD       | KQVVALKMKPIK   | TLRHKRMNLSEIGFLYFN          | HPNIVKELCAYQ    |
| MkcE        | 429 KENAEV   | CKGAFGTV      | YQVFYVNGOYN         | NVDVALKMKMDH   | SEKKRRNMLNEISITRYLK         | HPNIVTYINSYE    |
| MkcF        | 401 IGFTHMV  | CKGQYGV       | YDALYDKKR           | VCVIVVNY       | TPKEQHNVLQEIIGFLQCD         | HPNIIKYNCSVL    |
| PakA        | 911 YYNINKI  | CKGGAGEV      | FEAINSRNTQ          | TIAIKKMKLK     | AQNLKTVINEIGMMKNSN          | HENIVQVYDSYI    |
| PakB        | 570 GEGSTKI  | CKGGAAGEV     | FVVTQLKTN           | KVAIKKMLN      | QONMKLIVTEIGIMKSCR          | HONIIDYDSYL     |
| PakC        | 205 YKNMTKI  | CKGCAAGEV     | FVATSSKNNK          | RVAIKKIEIN     | NDNAKLLVTEIATIMKTS          | HDNIVYVYDSYI    |
| PakD        | 1376 YKVREVV | CKGGSTGKV     | YVGENSITGE          | KVAIKKMKVD     | NNNIKNIINEISTMKNSK          | HKNVIVYVSSH     |
| Pake        | 650 FEFKEKI  | CKGGYGA       | FKVLHRETNF          | PLAIKVLISIT    | PTRIKDIEKEIDLKCKR           | CPNVLSYVGSIS    |
| PakF        | 394 FILDKEL  | CKDCAAGSV     | YKGTHTDLGF          | TIAIKVEMK      | EDEFDLVVEIDILNRCN           | HPNIVKLYGSV     |
| PakG        | 139 FLIDCII  | CKTGSYGTV     | YKAIHKDTNF          | VIAIKSLPIK     | ESEIEIEKESITKCK             | SONIVSFGSGQ     |
| PakH        | 42 FEIQEKI   | CKGSGFSV      | YRAIHKSNT           | SIAIKEFEIF     | EANDVEPISKEIOLKKN           | NPYVVSYVGSIM    |
| Krs1        | 20 FTIIVEKI  | CKGCSYGSV     | YKAINISTGI          | VVAIKVSV       | NDLEDMEKEISFMKCK            | SPYITVYVYASFR   |
| DDB0216375  | 23 FDLIECI   | CKGRSFGSV     | YKATYKKTGN          | IVAVKLVPIN     | EDFQEIKEINIMKCK             | SKYVVOYVGNF     |
| Svka        | 12 YVROEKI   | CKGSGFEV      | FKGINKTNE           | TIAIKTIDLE     | DAEDEIEDIOEINVLQCE          | SPFVTKVYGSFL    |
| DDB0216374  | 21 FRVLEVI   | CKGSGFGV      | CTCINTVNE           | VVAIKFLEME     | GEENSSLKKEITIKNTVR          | CPYITVYVHCYI    |
| DDB0216379  | 23 FQIVEVV   | CKGSGFGTV     | CACRWMKKDRES        | NGNRLIAKQFVEVN | ADDVETNLNLVKEIDILKESMD      | CPYIIVEYKCYL    |
| DDB0216377  | 29 YHIOERI   | CKGSGFGOV     | FKAVHFANGK          | VVAIKIISLD     | DOEAIKDVKEISITAEEN          | YPNIVQVYGSYF    |
| DDB0216378  | 20 FELIEEL   | CKGAFSFGTV    | YKGNHLPNG           | IMAVKIIALD     | IEDTFDLVVEIDILNRCN          | HNNIVKLYGSV     |
| DDB0230010  | 935 FRDKIKL  | CKTGAAGNV     | FYAIRKSDSS          | PVAIKVLMER     | TKKDSPIPELYHSACN            | HSNIVTYLESYL    |
| DDB0229972  | 173 YESPPTI  | CKYDKV        | ILVILSOQYLON        | OVNIFPKILIDRE  | RINLIHONILSNEFOLIKSLK       | HSGIVNYIGMIN    |
| DDB0229973  | 848 IKLCEQI  | CKGSGCTV      | HVKTVDGFT           | VVAIKVLLK      | NTSPFLVEQFISEITIMVKLS       | HONIAKYLCHRL    |
| IfkA-a      | 449 WKKGSC   | IERKSNYSV     | YRGVDEDTDRKLLC (55) | VVELKRLIE      | KVKMIQKIEISMKYL             | NPYIILKLTGTFN   |
| SAMK-A      | 191 YEYVESI  | CKGVFSV       | GKYKRKGOENE         | FIAIKKIDIL     | SLNEEKIIEKINKIYSIN          | HPNIIKIIYCYK    |
| SAMK-B      | 186 YKLIIEI  | CKGAFSIV      | EKYENKLPKN          | EFISIKRINVL    | ASEKMIKVEINMLYSIN           | HPNIIKIIYCYK    |
| SAMK-C      | 181 YVFIKQ   | CKGSVNCSL     | EKYINKKTKE          | RILIKRIGKS     | NINETIINEISITCSID           | HPNIIKTYCYK     |
| SAMK-D      | 136 YIETISK  | CKNFCEIEKY    | YKSQTKVNEY          | IILIKKIIKN     | STLNEEKLINEIDTYLLD          | HPNIIKIIYCYK    |
| DDB0230038  | 521 AQPSDI   | CKSGNNGTTORAC | AIHKDKR             | IVMKOWNFI      | TSQATPMLFNEIEQLVAIK         | HPNIIALACASF    |
| DDB0230124  | 961 IOVGSRI  | CKLSFGDC      | YICNAFSR            | TIIKLRTO       | RFTDQFLGQKNEVMOIRELO        | HENLIVPVSQCL    |
| DDB0229871b | 695 IKTIIVK  | CKSYSILEGOYK  | KGKL                | VSIKQINGS      | INDFEMKOLGVLASIK            | SPLAVRITGVVF    |
| DDB0229850  | 51 IEYVCR    | CKSGSLCRV     | YKGRNLGPK           | VAIKVFPSI      | RFEFFKTEFLMQSIRS            | SPFLISYGVSI     |
| ARCK-1      | 1112 LEYTEK  | CKSGASGV      | FKCIYRCRV           | VAIKVLKSA      | DDEMTREDELKEFGVLASIE        | SHTIVGLYCVVL    |

|             | Subdomain I            | Subdomain II        | Subdomain III                                | Subdomain IV                                 |                |
|-------------|------------------------|---------------------|----------------------------------------------|----------------------------------------------|----------------|
| SAPKalpha   | 351 LEYTEKIGAGSSGKV    | YKGLYRGKE           | VAIKVLKSM                                    | TESKEIEEFKKEFOIMS AIR                        | SKHVVFHYCAVL   |
| DDB0229849  | 529 LEYTLKIGSSSSGKV    | YKCLYKCKE           | VAIKVLKSI                                    | TTQSQLEEFKKEFOIMGSIR                         | SQFMVTFYCACI   |
| DDB0229848  | 601 LTYNVLLGTGASGKV    | YKGTFFNGQE          | VAIKVLKSF                                    | TDKKDIABEFKKEFOIVSAIR                        | APGVVYFHGAGI   |
| Phq2        | 807 LEYIKRIGSGTYSKV    | YKGYRDKF            | VAIKVMRGS                                    | NMTTEQIESFKKECDILSTIO                        | SPLLISFYGSCI   |
| DDB0229847  | 1949 IVFLNKIGECTSAKV   | YKATWRNQE           | VAIKVLRSE                                    | PESQKLLDLFKELEIMSSIR                         | SPHVVFYVMVL    |
| SplA        | 2058 LEFGQITGKGFGEV    | KRGYWRETD           | VAIKLIIRD                                    | QFKTKSSLVDFONEVGLISKLR                       | HPNVVQFLGACT   |
| DPYK4-b     | 299 NKDDTVGGDGFSSV     | KKGYNETE            | VAIKLIKKA                                    | HGENVTVCDTFYHEVLIISNLR                       | HPNIVQFIAACI   |
| DDB0229872  | 177 LTVEKIGCGFFGKV     | YKARWRGKS           | VAIKKITLI                                    | KFRDLTETEIFDKEVSIIMSKIC                      | HPITCVVFYGCACS |
| DDB0229844  | 1476 LFLIKKIGAGSFSKV   | YKAKYMGE            | VAIKVLKGE                                    | ATSEQIELEFKKEYDILSLVS                        | SONLKIIFYGACK  |
| ZakA-b      | 379 DKDDSEGGAGNFGDV    | KKGLLNETE           | VAIKFVKKA                                    | HCEAITVCDTFYHEVLIISNLR                       | HPNIVQFMAACI   |
| 7TMK1       | 363 FKFGQVIGEGYFGEV    | RKAVWKCAY           | VAIKILHRN                                    | SFRNTDGNKEENVLKEVALISILR                     | HPNVLOFLGVCSS  |
| rk1         | 374 IKIGVRIKGNNGYGEV   | YLGTVWRGSO          | VAIKKLPAH                                    | NINENILKEFHREINLMKNLR                        | HPNVIOFLGCSL   |
| rk2         | 391 IKIGVRIKGNNGYGEV   | YLGTVWRGSO          | VAIKKLPAH                                    | NINENILKEFHREINLMKNLR                        | HPNVIOFLGCSL   |
| rk3         | 491 IVQVNRIGRSCAEV     | FTCTWRGI            | VAIKKAKLL                                    | NEDDEDFLNELAQEATIMSOLR                       | HPNICOFITCTCN  |
| DDB0214883  | 851 IAIGARIGRGGYGOV    | FRGSRWGRTE          | VAIKMLFND                                    | NVNLKLISDLRKEVDLLCKLR                        | HPNIVLFLMGACT  |
| Shk1        | 45 ITTESILIGDGSFGTV    | YKGRCLKD            | VAIKVMLKQ                                    | VDQKTLTDFRKEVALMSKIF                         | HPNIVLFLMGACT  |
| Shk2        | 174 YNREAKIGSCAFGSV    | YKQIVRCKE           | VAIKKITQT                                    | VFEENTMNEFKKEVSLMAKLR                        | NPHLLFLMGACT   |
| Shk3        | 24 INFEEIIGTGSFSGKV    | YKGRCRCKA           | VAIKLLHKQ                                    | NFDAATLSAFRKEVHLSKIF                         | HPNICLFLMGACT  |
| Shk4        | 277 IDRTDFIGGGSFGSV    | YKGRCRGQE           | VAIKIPRKO                                    | KLISLYELTFRHEVKIMSKIF                        | HPNVVLFMGACT   |
| Shk5        | 237 DVKTDLLCGGAYGKV    | YKATCRGKK           | VAIKVPPKQ                                    | TLSESELKSEKNEVEIMKQIF                        | HPNVVLFMGACT   |
| DDB0229963  | 1073 IKIDKEIGKGFHFSKV  | LKGNWKGKD           | VAIKKLNNS                                    | KDKAREEMIQEFKAEVELLGSIQ                      | HPNIVTCYCYSL   |
| DDB0231199  | 1377 LQILOFVIGEGALAEV  | HKGIWKGKE           | VAIKIFNEG                                    | SFSFRLEDFLKEVALIGLIS                         | HPNLLKLGKACI   |
| DDB0229940  | 386 VAFGDVIGASCAGKV    | YKGIYKGRD           | VAIKVYSSSE                                   | NFCFNIEEDREVTIMSLIDS                         | DHPNFTREYGCANK |
| DDB0218878e | 702 VIFGDVIGAGASGKV    | YKGIYKGRD           | VAIKVYSSSE                                   | NFCFNIEEDREVTIMSLIDS                         | DHPNFTREYGCANK |
| Rck1        | 842 VSIHKWIGASSGRV     | YNGQYKGGK           | VAIKVLGPE                                    | VCVHFDLNEFKREVALMSIFK                        | HDNLARCLGAGO   |
| DDB0231197  | 599 VKNVHLYDPSPLCTV    | YSCVYNGMD           | VAIKVFSQD                                    | GMGFDVWVSEYKEITIVASQ                         | HPKVIKCYCAHT   |
| DPYK2       | 853 IQFIQVIGGAFSEV     | WEGWKKGIH           | VAIKKLLKI                                    | GDEEQFEREIREVONLKKGN                         | HONIVMFTGACY   |
| DPYK3-b     | 1057 VAIVEKIGAGSFANV   | FLGIWNGYK           | VAIKILKNE                                    | SISNDEKFIKEVSSLIKSH                          | HPNVVTFMGACI   |
| Gdt1        | 1372 IHFQELIEKYSWEILL  | YRCTLVGDKN          | ALIKKILKL                                    | TKNCEEAYRELNITISRIK                          | HONILPLITCVI   |
| Gdt2        | 1290 IIKKNYIGSEGTFGIV  | YRGIWRRSSP          | VAIKLLKNE                                    | YVDHDEIEKEISLERLR                            | HPNILLVYGRFI   |
| Gdt4        | 1349 IVLEKYIGSEGSFGV   | YSAIWRSSS           | VAIKLFFKH                                    | YSKDEIDKETSITISKIK                           | HPNIVSFTIGSL   |
| Gdt6        | 1194 IEVKEIISQNNLSTV   | NIANYRGLQ           | VILRKIKTH                                    | SANYTKTYSQAIKKEVYTEMDDISKIK                  | NKNIVSFTICCTH  |
| Gdt8        | 1038 TEQLIASYLPKVVYV   | FKGYRDLA            | VAIKKFAIS                                    | DNSKSFEEKIKNEVQILSKVN                        | NINIVVRIYCSAQ  |
| Gdt9        | 1290 LDFDEICCGGTGMV    | YKGRWRSOV           | VAIKMMRVG                                    | TVNCDEVYREMDIMGKIR                           | HONIVSFTICCVV  |
| KinX        | 22 LDFISEIGSGGFGKV     | FKGEYLCAV           | VAIKRHIL                                     | PDDPNRVDLEKFLNREIETIKLFT                     | HPNVIOFLGVCSS  |
| KinY        | 32 LKVGESIGSGAYGIV     | YRGTTLFNSD          | VAIKKIQNE                                    | KSEKNEFIKYLKREVAVLKNIQ                       | HPNVIOFLGVCSS  |
| DDB0229853  | 33 LFMDFVIGRGSFGOV     | OKASYFGTD           | VAIKQLSTL                                    | VSIDPDYFKFMLREIKILKGMR                       | HPNIVQYIYGCAC  |
| DDB0229863  | 336 .VGNIEIGSGKYGSV    | SICVWLGTP           | VAIKKLHEN                                    | NEETEILVORELOLKEIR                           | HPQIVQFLGCVSR  |
| DDB0229866  | 35 LEFGQITGKGAAYGKI    | FKGEYFCTP           | VAIKKISLQ                                    | PNDVKYKDLTKFIOREVAMLRFS                      | HPNIVQFLGVCSS  |
| DDB0229851  | 23 FDFPLSISGSGGFGKV    | YQGVNLNGE           | IGIKKISIT                                    | DNDPNRDLKFLEREITLKMIS                        | HPNVIKFYGIAE   |
| DDB0229865  | 15 IEENEFSKCSFAKV      | YKGSYYGNP           | CVKVIKDD                                     | TLIDKESVFLKREIETLKNLNLQ                      | GKKNIRITIGICE  |
| GefX        | 21 LEFNEKIGKGSFSGSV    | FRGCYLELD           | VAIKKIEKA                                    | DDPEYLKVIDREVSMLQSLR                         | HPFVIVNFSGICV  |
| DDB0229867  | 18 LVFKDIIGKGNFGCV     | YRGNYLGEV           | VAIKQIPSF                                    | DDPDYCKYTEREVKALRYIR                         | HPFVIVNFSGICV  |
| HH498       | 530 FKTARKIGACAFGDV    | YKVEWRNKN           | VAIKRVKIE                                    | VVGSDFYKQWIRDKILEAVLVMKISN                   | FSSFVILKYATCI  |
| GbpC        | 878 VKINKEVGRGAFGIV    | YEAEMWSEV           | VAIKKLLLP                                    | SSTDTTNLNGNGEVMVYDDPDQLIEDRLRVFRFRHEVYVMSGLN | HPNVMKISGFCI   |
| Pats1       | 2247 LMIEELIGEGGAALV   | YRARWOGOT           | VAIKKLLTI                                    | ENLDSPIEINDISLKAFFNFRRECVWVSELE              | HPNIVQFLGCLL   |
| QkqA        | 1242 ILYEROLIGEGGFLI   | HKGLLISNKS          | DIAIKSLILCNSNNNNNSNNNSNNNSNNNFKNNNNEDEFIKQEF | OHEVFTMSNLN                                  | HPNIVKLYGLMH   |
| Roco4       | 1026 IEYEKQIGKGGFGLV   | HKGRLLVKDKS         | VAIKSLILG                                    | DSEGETEMIEKQEFQREVFIMSNLN                    | HPNIVKLYGLMH   |
| Roco5       | 2175 LEIEIEKVGEGGFGIV  | YKGLLRGO            | VAIKQITID                                    | SGQAEAAEYIREFRREVWLSNTIT                     | HPNIVSLKYGCL   |
| Roco6       | 1356 FESPKLIGRCASGKI   | YRANLNDTM           | VAIKQIEVV                                    | GEDAPRISEFRREIHMVMDLK                        | HPNVNVLGCFTL   |
| Roco7       | 1775 LKFGPOLGSGSYANV   | YRGIWNGSE           | VAIKVLNFD                                    | DGHANTTEKYERFRNEAHTGELR                      | HANTVSLMGVSL   |
| Roco8       | 1456 LIYQEEIGVGGFSRV   | YKGIYKNNT           | VAIKQNFTE (120)                              | LSTSSLSNSNSOGEDSMNQISSGKLNAINFRREVWLSGSL     | HPNIVLMKGFQ    |
| Roco9       | 3008 ELDPNPLIGCGGTATV  | YKGRWRQSD           | VAIKLLKTD                                    | VVGSDFSKVFAEYRREIFCLSSFI                     | HDNILDKFCFL    |
| Roco10      | 2069 HSNQENEGTSTQSMGMV | YKQF                | VNIKVFNAP                                    | LLGADFQNNCARILSSFRHEALSILNFR                 | HSNVLSITIGISM  |
| Roco11      | 1185 VVCEEQIGVGGFGLV   | HKGLILODKS          | LVVAIKSYIVG                                  | NSSASDIIRKQEFHHEMYIMSSLN                     | HLNIVKLFVGSQ   |
| DPYK3-a     | 726 IKLEKLESNSKSSNIW   | QIEYKSTQ            | LVLPQPKDQ (11)                               | LFNGSNVSGSNNSGSSGNNHHHCNNSNSNSEVIPSXYTMIQ    | HKNLGLLVGCG    |
| DDB0229956  | 758 LELTKEIGRGSVGV     | KRCKWKGYE           | VAIKQFNEE                                    | ELGFSEREFHSEATIMSVLR                         | HDNIVHCVGCSA   |
| DDB0229957  | 986 VQLHERIGTGATGDI    | YRGLISQDNLNRHI (42) | VAIKKLHPL                                    | ADPSPEMIQDFYNEVRLISMFN                       | HPNVKYYVGGCT   |
| DDB0220138  | 946 IOFFNIGCGGFSKV     | YKGVWRSKD           | VAIKQIELO                                    | NNKSLDDFRREVGLISKIKP                         | HPNLLAYYGCACK  |
| DDB0220436  | 345 FNDNSKIGEG.GOC     | SILYKMG             | TAMKRFKPS                                    | LSSSLISKFEENEVLLERLN                         | HPNIVKILITYST  |
| DDB0230133  | 192 LEIGNVIGGGYGAIV    | YKAKWRGLS           | VAIKVISEL                                    | SDGSEFEKELEMHKELH                            | HPNIVHVFQFCV   |
| DDB0229871a | 360 LLFIKIKIGSACCEV    | COYEWKTP            | VAIKTIFKS                                    | LLRKDKKEEFKEVSIILKCLR                        | HPNVVLFMGACT   |
| DDB0229955  | 662 LKISSKIGEGTFGV     | YKGLWRGSS           | VAIKQIKIN                                    | EDVNNQVLEEFKELTILSRIR                        | HPNIVLLMAACT   |
| Bud32       | 35 DEIGILISQGAEAKT.Y   | ETD                 | LYGLKICIVKE                                  | RFSKAYRHPILDQKISSKRILQEVRSINCK               | KKGIQVPSLYLV   |
| DDB0231196  | 459 IDFHTOIGSAGNASV    | FEGTYKGP            | IACKEMPVS                                    | GTYEQSVDSIKEIAAGQIKK                         | LGCATVVETIGVLK |



## Subdomain V

## Subdomain VIA

|            |       |                                               |                                   |          |          |        |                            |
|------------|-------|-----------------------------------------------|-----------------------------------|----------|----------|--------|----------------------------|
| Akt1       | T     | EDKLYFILDYV.NGG                               | ELFYHLO                           | KDKKFTE  | DRVRYVGA | EIVL   | LALE                       |
| DDB0220670 | T     | QDSLQCMVLDYI.GGG                              | ELFYHIS                           | ERETFS   | ETARFYIG | QIML   | LAIG                       |
| DDB0216386 | T     | KKKLYVMVEFL.HGG                               | DCASLTH                           | SLNTLE   | BREAKNI  | IAQI   | VNGL                       |
| DDB0220701 | S     | TDKLYLVMEYL.IGG                               | DCASLLR                           | ALGCFE   | BHMAKHYI | IAETV  | LCLE                       |
| DDB0220700 | T     | DKKLFVMEFL.NGG                                | DCASLLR                           | SFNNMPE  | DLTKNI   | IAQI   | LCLE                       |
| DDB0185113 | T     | KEYYLVMEYL.QGG                                | DCFSLLO                           | MLGSMDE  | BNMAKMI  | IAETV  | LALE                       |
| DDB0229452 | SP    | CKEKVLIMEYL.SGG                               | DCAFHLN                           | DVGVFPE  | ELAKOYI  | IAETV  | CLD                        |
| NdrA       | D     | DNYLYLIMEYL.PGG                               | DMMSLLI                           | KYDIFTE  | NOARFYI  | IAETV  | LATE                       |
| NdrB       | D     | ANFLYLIMEYV.PGG                               | DMMTOLI                           | KYDTFTE  | DATRFYI  | IAETV  | LALH                       |
| NdrC       | D     | ANYLYLAMEYH.CGG                               | DFRALIN                           | NLGTLS   | DEARFYI  | EMTE   | BAIS                       |
| NdrD       | D     | SQYLYLAMEYH.CGG                               | DFKTLIN                           | NLQRL    | EDDIAPFY | MAEM   | LAVE                       |
| DDB0231558 | D     | DOYLYLAMEYV.PGG                               | DLRSLSL                           | ALNSL    | DEDSARFY | MAEM   | BEAVD                      |
| DDB0216387 | D     | NEGVFYVMEFI.AGG                               | DFNSYCKRLV                        | DGKKEFTE | EIKFYI   | IAELV  | LCLE                       |
| Pdk1A      | S     | EOCLYVLELC.SQG                                | DLLHQIK                           | KVGSF    | DYRSCOYI | VAET   | ISGLE                      |
| Pdk1B      | D     | ENNLFILEYC.PNG                                | DLLGALK                           | KAGCF    | SIDVVRFY | AAET   | LIALE                      |
| PKA        | D     | EKKLYLLEFYV.AGG                               | EVFTHLR                           | KSMKE    | SNSTAKFY | AAEIV  | LVALE                      |
| pk4        | D     | DRYLYLQEFFI.PGG                               | ELFDYIR                           | ANGSL    | SLYVTOIY | AAEIV  | LVALE                      |
| DDB0185224 | T     | PTKIHFIMEYA.GKK                               | DLFHHLR                           | ANKCFTE  | BOTTKLIV | AEIV   | LVALE                      |
| pk2        | T     | KDKLYMVLDFV.NGG                               | ELFFHLK                           | REGRE    | SEPRVKIY | AAEIV  | SALD                       |
| DDB0220702 | N     | EKKLYLVDFV.NGG                                | QLFYHLO                           | KEAIF    | SEDOVRFY | MAEL   | LVALE                      |
| pk3        | N     | EDFLFMCMDYV.PGG                               | ELFHHLO                           | KAGKF    | PEELAKFY | IAEIV  | ICSLH                      |
| Aurora     | D     | DKRVFLIIEFA.KGG                               | ECFKELQ                           | KVGSF    | NEQTAATY | TLOI   | ADALR                      |
| MLCK-A     | T     | PEKLYLVMELV.TGG                               | ELFDKIV                           | EKGSYS   | EADANLV  | VKKIV  | SAVG                       |
| DDB0216385 | S     | DEDICLVLEWI.PNG                               | DLFDRIV                           | KKGVFNE  | EEARLT   | MTKSL  | LSAVE                      |
| DDB0216309 | T     | TKHLHLVLELV.TGG                               | ELFDKIV                           | QRGEYS   | BODASKIV | ROIV   | SAVG                       |
| pXi        | T     | DNEVLVLVLELV.TGG                              | ELFDKIV                           | EREFYTE  | QDASTL   | LIGTV  | TKVIO                      |
| DDB0216308 | S     | NDYLYLVLELI.RGG                               | ELFDKIV                           | EKGNYS   | EKDACNL  | VRROIV | SAVE                       |
| DDB0229351 | S     | ELYYYIVTELL.QGG                               | ELLYOLEK                          | NHPST    | NENVSNY  | TEHARK | IIKOVIQAVG                 |
| DDB0216307 | S     | DSHLTLVMELV.TGG                               | ELFYKIV                           | ERGSFTE  | BKARNV   | VRVOC  | QAVE                       |
| DDB0216312 | S     | TDKIYLVVLELV.TGG                              | PLFDRIV                           | DKKSFTE  | BKAKLIT  | OOQL   | LSLV                       |
| Snf1       | T     | TTDIFVMVEYV.TGG                               | ELFEYIV                           | KNGKLE   | DESRR    | LFOOM  | ISGVD                      |
| DDB0229364 | T     | SKYLFILLEYV.EGG                               | ELFDYIV                           | EKGGL    | ESGEAL   | FFFQ   | IIIGLE                     |
| Lkb1       | IE    | EKGKLYIVVEYV.GGG                              | TSONILE                           | NAPNGR   | LPPHQ    | SOFIF  | ROLIACE                    |
| MARK-A     | T     | SRALYLIMEYA.GEG                               | EVMDFMI                           | AHGVLT   | ESCA     | RFTT   | OLVSAIN                    |
| MARK-B     | ED    | DVGRICLILELV.SGG                              | ELFDYIV                           | ARGRL    | SEK      | GRKFF  | ROMLCLGI                   |
| MARK-C     | KR    | EEEGTTYIVVEYV.SGG                             | ELFDYIV                           | AREYI    | KEK      | ARKFF  | ROMISAIE                   |
| DDB0231454 | K     | DDAMFILMDYC.QGG                               | DLFHYV                            | NKFG     | LKGVK    |        | MVNSPDIGDQVLMGVLP          |
| DDB0219986 | T     | DRNAFMOMEYI.SGG                               | NLLDWC                            | RN       |          |        | NNNDNENKRRPWEIOKIFOOIIOAIA |
| FHAK-A     | T     | KDQQLFFILELA.NGG                              | ELYNKIG                           | FNEPL    | LNQ      | SFIF   | COLINAVS                   |
| FHAK-B     | S     | STDCFFIVLELA.TN                               | DLSNLLR                           | KRCV     | DE       | DIKRI  | COLLGFN                    |
| FHAK-C     | S     | DRYFYIVLELA.TGG                               | ELFEKIK                           | OKGRF    | SE       | PEAKD  | TEKOLEAVS                  |
| FHAK-D     | T     | QKNLYLVLELV.TGG                               | ELFDKIV                           | SERKFO   | EDT      | CRYIL  | COLCDSVR                   |
| FHAK-E     | N     | EKVLSLILELV.ECG                               | ELLNDIVS                          | NLFY     | TE       | DKAKT  | LFRQIVDGVL                 |
| DDB0220010 | DP    | QEEYIYIVMEYI.EGG                              | SIM                               | SANETS   | EDL      | ARKY   | FRDIVFGL                   |
| Apq1       | EE    | TDPTFIYIMECC.EGG                              | DFSKYTR                           | THKLT    | TE       | EKALY  | FMKOLANGLK                 |
| tsunami    | N     | KNEFTLVTEYA.DG                                | DLSQIIS                           | EETLS    | V        | DLIQ   | SICYOLVIALN                |
| Cdk1       | C     | QNRLYLVEFYL.DO                                | DLKKYMD                           | SVPAL    | CPQL     | TKSYLY | OTIKGLA                    |
| Cdk5       | T     | ERKLTIVVEFYL.DO                               | DLKKYLD                           | ECGGE    | ISKPT    | IKSFM  | OLLKGV                     |
| Cdk7       | H     | KSNVYLVFELM.OW                                | DLQEVIE                           | DKSIL    | IKPAD    | IKSYM  | KMLIQGIE                   |
| Cdk8       | NP    | KDKLLYLTFDYA.EF                               | DLFGIIK                           | YHRENG   | SHFS     | DATIK  | SLIWOVINGIH                |
| CDK9       | SKASA | SNNHKGVSVMVEYV.DH                             | DLNGLM                            | DSP      |          |        | AFKYFAPQIKCYL              |
| Cdk10      | GS    | TGDKIYLVVEYL.EH                               | DVASLIDNI                         | NKPFK    | SEIK     | CFLL   | OLLRAVE                    |
| Cdk11      |       | GKNINSIFMAMEFI.DH                             | DLRGLMEVI                         | KKPFL    | PSEI     | IKTLI  | QOLINGVS                   |
| DDB0229294 | TNF   | ETSEYIIVVEPYF.EH                              | DLSGLLS                           | EHR      | LSI      | PQVK   | CYFKOLLEGIN                |
| DDB0229424 | S     | NDDKLVVVEFYL.EY                               | DLWKFIS                           | PNKYM    | TL       | SCTK   | FFIHOLEGLD                 |
| DDB0230050 | ID    | KNSVLVLEMEFI.EG                               | DLWKIMS                           | NPQCT    | LSL      | GOLK   | NFTKOLLEGVK                |
| CK2        | DP    | OSKTPSLIFEYI.NNT                              | DFK                               | HLSP     | TL       | DFD    | VRYYIRELHALD               |
| DDB0219953 | DQ    | SSKVCSLVVEPFV.NKT                             | DIRELVY                           | TLDDYD   | IRYYI    | FEI    | LKAID                      |
| ClkA       | F     | KDHICLVKRY.GL                                 | SLYEFLK                           | KNRYR    | PL       | SQI    | ONISKOLITAIY               |
| DDB0229841 | RKCS  | DSYQPPLTSILNSIISSNDNPOQHSTLIQQKDEDFYFESIQP.OY | SLNLNIS                           | NNM      | DQDD     | LC     | QFYETLMLGLK                |
| DDB0229333 | KSLN  | IKTKN.LIESPVDDGTYDLYFEHDSQS.DF                | TLYQIMR                           | SDKA     | SRK      | QCPY   | VLITTIK                    |
| DDB0229296 | RKSS  | ENYLI                                         | SNKNN.RNNVRLPLLQKGGDDDIYFEYLLP.EF | TLQMI    | H        |        | NKLT                       |
| Dyrk1      | F     | RNHLCIVTELL.SY                                | NLYDLLR                           | NTHF     | HGVS     | LN     | LKKFAHOLITLAF              |
| Dyrk2      | F     | RNHLLITTELL.SM                                | NLYDFLK                           | VNH      | FQY      | NL     | VRRFGOLITSLR               |



## Subdomain V

## Subdomain VIA

|             |                   |                          |                                          |
|-------------|-------------------|--------------------------|------------------------------------------|
| SAPKalpha   | EPKLCMVMENC.SRC   | SLYHVMD                  | NNSLDIGWERTFRFALETVRGIE                  |
| DDB0229849  | EPKLCMVMVEYC.SRD  | SLYHVMN                  | TKKYDIGWDRFFQFTMOMTLGVO                  |
| DDB0229848  | KDKLCVMVEYC.SRC   | SLYHITK                  | DDTTQFTWDFNFFNLGTQAINSLD                 |
| Phq2        | ESQLSMVMVEYC.SKG  | TLHKVLN                  | NPLDFDWDKWFKWMTEVVEGVR                   |
| DDB0229847  | DPKICMVMVEYC.SNO  | TLYHLMH                  | LQMNFTWDVWFKFAIEMVRCVN                   |
| SplA        | GEDHHCIVTEWM.GGC  | SLRQFIT                  | DHFNLLEQNPHIRLKLALDIAGMN                 |
| DPYK4-b     | NKEVNHCIVSEWM.SGG | NLSQFIS                  | NERKILEINPHLRVKILLDIAGML                 |
| DDB0229872  | GPSNDRSLIMEYM.EGG | SLRRLLD                  | EKSSYHLPPSLQLSIARDIAEGMN                 |
| DDB0229844  | EKKLRMVEYEC.QHG   | SLYHIMS                  | KRKMDISWPLVFKWMHOAVDGIN                  |
| ZakA-b      | EKETNHCIVSEWM.SGG | NLTOFLM                  | NNHKVLENNPHLRVKLLLDIAGIL                 |
| 7TMK1       | ETNLNGIVTEYM.GGC  | SLDRLLT                  | DRYFLIKQNPILAWNMALDIARGMF                |
| rk1         | PPDICTCTEYM.PRG   | SLYSILH                  | DQALQLOWSLLIKMMIDAAKQVI                  |
| rk2         | SPDICTCTEYM.PRG   | SLYSILH                  | NEKIKISWSLVKRMMDAAKQII                   |
| rk3         | PPEILVMEYM.PLC    | SLYRILH                  | DPSISLDWPRMKSMALDIAGCMN                  |
| DDB0214883  | PSSPCIVTEYL.SRC   | SLANILL                  | DESIEMDWGLRLQLGFDGARGMT                  |
| Shk1        | TPGKLMICTELM.KG   | NLESLL                   | DPMVKLPLITRMRMAKDAALGVL                  |
| Shk2        | PEDLSIVTELM.PKG   | SVHSLRA                  | KEDTSDFTFKRAILARDTVLGMT                  |
| Shk3        | PGRCVIVTELV.PKG   | NLETLLH                  | DQKIQLPLYLRMRMARDAAALGIN                 |
| Shk4        | SGKMOIVTELC.OTD   | LEKLIHND                 | RTKKEFSLFRRMQAKDAALGMN                   |
| Shk5        | PGKVMIVSELM.OTD   | LEKLIHSS                 | EVEPPPLYERMKCLDAALGIN                    |
| DDB0229963  | NPMCIVMEFL.PSC    | NLFELIHSKPS              | QQQSIKLDSLILALAFDIARGMQ                  |
| DDB0231199  | SHKSTFMIVTELM.HKG | TLLEVIN                  | KNKPLSLEDIIKYALSVAQGLA                   |
| DDB0229940  | NKKYLFHIVSELV.KSC | SLRDLL                   | DKEKPLAYFTQLSIASDIANAMK                  |
| DDB0218878e | NKKYLFHIVSELV.KSC | SLRDLL                   | DKEKPLYFTQLSIASDIANAMK                   |
| Rck1        | DDKYFHLIETEC.HNG  | SLFSYLR                  | DQRNNISFGORLHFALGIARGMR                  |
| DDB0231197  | NTNKPFIIVTELC.SRC | TISNALNQIR               | KTTGQPPAIPLIVHMAIDAAOSLE                 |
| DPYK2       | KPACITCTEYM.AGG   | SLYNIILHNP               | SSTPKVKYSFPLVLKMATDMALGLL                |
| DPYK3-b     | DPPCITCTEYL.QGG   | SLYDVLH                  | IQIKLNLPLMMYKMIHDLISLGM                  |
| Gdt1        | SKDYLCIAFEYP.PLC  | SLDYIIS                  | KKKLMKSTQKIRILIDVAKGCK                   |
| Gdt2        | FSGIHGIVTDYC.SKG  | CLSKYIH                  | ENKYKTI IQIRILIDISKACA                   |
| Gdt4        | FLNTYGIVIDYH.PRG  | SLNYYTR                  | NONIKLSMVQNIIRISLIDISRACS                |
| Gdt6        | DSSHLWIVTEYA.PLC  | SLSSLIH                  | QKKEKLSLIQKVLMLDTAKGCE                   |
| Gdt8        | ISHVCIVTEYA.KEG   | SLGSLIH                  | DSKIKLSFIQKVKFMLDAAGFT                   |
| Gdt9        | LEHLCIVTEFS.PIG   | SLGDLIHGDNNQKSNNTNT      | ITNTITNTNTNTNTSTSTSTKLTVKOKLRILADDIARGCO |
| KinX        | NGILFIVTELI.EGG   | DLQYYLK                  | NQSIDLPWFLRANIALDVSLAMS                  |
| KinY        | EPLASPS           | LVNRLNLSSTWIVTEYI.GGC    | NLHERIK                                  |
| DDB0229853  | EGRYMIVTEYI.KGG   | DLHQFIK                  | ARGVNSISWTLRMKALDIASAFS                  |
| DDB0229863  | EKDEIHLTEFM.DGG   | DLFDALI                  | FGDIPLTWKEKLRISLIDIAOSCR                 |
| DDB0229866  | GSSLYIVTEFV.QGG   | DLAYYLFRNKFDTPPEQYIHRKVN | VGSSSTPDLSDPTVHNGEKLVLAWPLRIKIAYDVACAMA  |
| DDB0229851  | ERSLFLITELV.SGG   | DLHWYIK                  | NKSIDI TWKLVKVIARDIAASMA                 |
| DDB0229865  | DSLFLIVTELI.NGC   | DLGNILL                  | DHKFHIPWSLRVKIARDIAECME                  |
| GefX        | SSGLYIVTEFV.SGG   | DVRQLLK                  | KTPPIGWDKRVSIAVDIAKAMV                   |
| DDB0229867  | ESGFYLIETEFI.EGL  | DLRRYIK                  | SVKPPKWLRSRVNIALGVAKTFL                  |
| HH498       | EKELLVLEFC.DNG    | SLYTIINTIPIGGAG          | ANNNNNNNNNNDIIQSLPSINTLSLNIANCMN         |
| GbpC        | QPLCMALVEYV.RYG   | SLYSLLS                  | NSSIEISWGLRLOIASEIAGMQ                   |
| Pats1       | DPLCIVTEYL.PHG    | NLYSFLH                  | KPEMEFSWLFRLKVALDISSGMA                  |
| QkqA        | PPRMVMEYV.EHG     | DLYHLCO                  | DKERYASLGWTLKLRMLDIAGCIG                 |
| Roco4       | PPRMVMEFV.PCG     | DLYHRL                   | DKAHPIKWSVKLRMLDIALGIE                   |
| Roco5       | DPCCIVMEYI.PNG    | TLYSHLR                  | KSFSSITWOLKLIANIDAIK                     |
| Roco6       | SPFTVMVEYI.DCC    | DLHKFLH                  | SPIGDQNGNWALILKLALDIAGCME                |
| Roco7       | SPFCLVTELL.QYG    | DLAKFIR                  | NTAETFSWGTVLKLALDIAGCMN                  |
| Roco8       | FEPYAVMEYM.DIG    | SLSSFLLK                 | KKEDGOVLDWQMLLKIIVTDIASGMA               |
| Roco9       | PLAITTEFO.SGG     | NLYDYIH                  | DLKNPLDWOLRIKIAKIAASLO                   |
| Roco10      | NPIALITENP.TFG    | SKGSTTLSEYIQD            | ROKHPEIPWNIKLIALDIARAMD                  |
| Roco11      | PPRMVMEFA.PHG     | DLYHFLE                  | KKKNIKWSFKVRLMLDIAGKIE                   |
| DPYK3-a     | S...LFEFS.KGMN    | SLHDLIH                  | RDGLKIDMALFIKISKDIASVMG                  |
| DDB0229956  | PGKMYLVCDDY.SRC   | SLYSVIT                  | ANICPLSNARIVHLALQVAKGMN                  |
| DDB0229957  | IANWSIVMEYV.PCG   | NLMDVLA                  | NPVLVIPYKLVLRMALDIAGLH                   |
| DDB0220138  | ANACYLITEYL.PRG   | SLHDLIH                  | REQLMKLDFKQKVSFAICVALGCY                 |
| DDB0220436  | IERILLLEFI.DGN    | SLDKYPSQLPL              | SPSSSLPNPLKVIQDFQOIVDAMI                 |
| DDB0230133  | PKCIVLEYI.EGG     | SLDKYLH                  | NPNYTFSPQLRLKMANDIAGKMC                  |
| DDB0229871a | NGNLAITTEYL.NRC   | SLRDVLT                  | TMNKSELISLVKVKMLIDVAGCMN                 |
| DDB0229955  | PPNLCFITEYL.PCG   | SLYDALH                  | SKKIKMNMQLYKKLAIQIAGCMN                  |
| Bud32       | GNNRIVMEFI.KGE    | TVKHLYL                  | KNQESTQHQNQIESIMKELGNQIG                 |
| DDB0231196  | NQKLFVLMVKE.KCN   | LSFLCNKSEILK             | MOREGI.WTSIFKISKDILKGLV                  |





Subdomain VIB

Subdomain VII

|            |       |                   |                |                 |
|------------|-------|-------------------|----------------|-----------------|
| Akt1       | HLHLS | GVLYRDLKPENLLLT   | NEGHI          | CMTDFGLCKEG     |
| DDB0220670 | FLHEH | GVLYRDLKLENLLMD   | LDGNI          | CLVDFGLCKEG     |
| DDB0216386 | FLHSC | GIYHRDLKVENLLFD   | KNGII          | KLVDFGLSEVGF    |
| DDB0220701 | YLHKS | AVYHRDLKPDNMLID   | GLGHI          | KLDFGLSKIGIIDDK |
| DDB0220700 | YLHNH | GIYHRDLKPDNMLID   | SNGHI          | KLDFGLSKFDFVDE  |
| DDB0185113 | YLHSH | GIYHRDLKPDNMLID   | KKGHI          | KLDFGLSKVGLLD   |
| DDB0229452 | FLHEK | SIYHRDLKPDNMLID   | SDGHI          | KLDFGLSKVGLLD   |
| NdrA       | SVHTL | GVYHRDLKPDNMLID   | SKGHV          | KLDFGLSKVGLLD   |
| NdrB       | SLHKL | SYIHRDLKPDNMLID   | QKGHI          | KLDFGLSKVGLLD   |
| NdrC       | SLHEM | GIYHRDLKPDNMLID   | KLGHV          | KLDFGLSKVGLLD   |
| NdrD       | SLHRL | GVYHRDLKPDNMLID   | KLGHV          | KLDFGLSKVGLLD   |
| DDB0231558 | SCHRL | GVYHRDLKPDNMLID   | RDGHV          | KLDFGLSKVGLLD   |
| DDB0216387 | AFHSY | GLYHRDLKPDNMLIN   | KDGHV          | KLDFGLSKVGLLD   |
| Pdk1A      | HLHSL | GVYHRDLKPDNMLMS   | SDLHV          | KLDFGLSKVGLLD   |
| Pdk1B      | YLHGK | GIYHRDLKPDNMLLG   | KNOHL          | KLDFGLSKVGLLD   |
| PKA        | FLHKO | NIYRDLKPDNMLID    | NOGHI          | KLDFGLSKVGLLD   |
| pk4        | YLHNO | DIYRDLKPDNMLID    | OYGHI          | KLDFGLSKVGLLD   |
| DDB0185224 | YLHAE | NIYRDLKPDNMLID    | EKGHI          | KLDFGLSKVGLLD   |
| pk2        | HLHKO | DIYRDLKPDNMLID    | SEGHI          | KLDFGLSKVGLLD   |
| DDB0220702 | HLHDS | NIYRDLKPDNMLID    | SOGHC          | KLDFGLSKVGLLD   |
| pk3        | YLHSN | NIYRDLKPDNMLID    | EEGHI          | KLDFGLSKVGLLD   |
| Aurora     | YCHSK | HVIHRDLKPDNMLIG   | VGGEI          | KLDFGLSKVGLLD   |
| MLCK-A     | YLHGL | NIYHRDLKPDNMLLKS  | KENHL          | EVAIADFGLSKI    |
| DDB0216385 | YLHDK | SVVHRDLKPDNMLIF   | SDSYGGI        | KLDFGLAKF       |
| DDB0216309 | HLHAN | GIYHRDLKPDNMLIC   | AGEEGDD        | IRVADFGLSKI     |
| pXi        | YLHSK | DIYHRDLKPDNMLYS   | DNSDOA         | IKKCDFGLSOR     |
| DDB0216308 | YMHQH | GVYHRDLKPDNMLIC   | SGDDEKEE       | IVRIADFGLSKI    |
| DDB0229351 | FLHSN | KIYHRDLKPDNMLIF   | DKSLGS         | ILKIIDFGLSYVD   |
| DDB0216307 | YLHSQ | GIYHRDLKPDNMLIC   | NGEGEDM        | TIKIADFGLSKI    |
| DDB0216312 | YLHSI | GIYHRDLKPDNMLLLK  | TPDDL          | TVALSDFGLSKI    |
| Snf1       | YCHHH | MVYHRDLKPDNMLLLD  | PINKC          | IKIADFGLSNM     |
| DDB0229364 | YCHSR | NIYHRDLKPDNMLLS   | GDKRI          | KIADFGMSI       |
| Lkb1       | YLHSQ | KIYHRDLKPDNMLIFT  | HANVL          | KLDFGLVAEDSS    |
| MARK-A     | YCHSK | RAVHRDLKPDNMLLLD  | CNRQI          | KIIDFGLSNV      |
| MARK-B     | YCHSN | MVYHRDLKPDNMLLLD  | EDGNL          | KISDFGLSNI      |
| MARK-C     | YCHAN | LIYHRDLKPDNMLLLD  | SNGDI          | KISDFGLSNN      |
| DDB0231454 | HCHKL | NIYHRDLKPDNMLIFD  | NQMNV          | KIIDFGLS        |
| DDB0219986 | YMHSN | CIYHRDLKPDNMLIR   | QDQTP          | VISDFGLSKDIS    |
| FHAK-A     | YLHSK | GIYHRDLKPDNMLIF   | DSYGGDYL       | KIKITDFGLARF    |
| FHAK-B     | YLHNL | GIYHRDLKPDNMLIF   | YNEFKQGS       | IKITDFGLSSF     |
| FHAK-C     | YLHDL | NIYHRDLKPDNMLIS   | AVSHGKS        | SVIKVDFGLAKI    |
| FHAK-D     | YLHSN | GIYHRDLKPDNMLLAT  | PNSFL          | LKISDFGLSRA     |
| FHAK-E     | YLHNK | GIYHRDLKPDNMLLK   | HKNFNQND       | AIKITDFGLSRT    |
| DDB0220010 | YLHEQ | KVIHRDLKPDNMLLVN  | SEGVV          | KITDFGLVSHI     |
| Apq1       | FLRQK | QVIHRDLKPDNMLLL   | SDDSEHP        | ILKIGDFGLAKF    |
| tsunami    | YLHYK | KVIHRDLKPDNMLIT   | SGGQI          | KVDFGLAKTI      |
| Cdk1       | YSHGH | RVIHRDLKPDNMLID   | ROGAL          | KLADFGLARAV     |
| Cdk5       | FCHDH | RVIHRDLKPDNMLIN   | RKGEL          | KLADFGLARAF     |
| Cdk7       | ACHRN | WVIHRDLKPDNMLMS   | INGDL          | KLADFGLARQY     |
| Cdk8       | YLHSN | WVIHRDLKPDNMLVM   | GEGKECG        | TVKIGDFGLARIFQ  |
| CDK9       | YCHRN | NVIHRDLKPDNMLLD   | NNGIL          | KLADFGLARPFN    |
| Cdk10      | YLHSH | WVIHRDLKPDNMLYG   | NNGNL          | KLADFGLARKF     |
| Cdk11      | YMHDN | WVIHRDLKPDNMLYT   | NKGVL          | KLADFGLAREY     |
| DDB0229294 | ETHNA | GVMHRDLKPDNMLLVN  | NKGSV          | FIGDFGLATS      |
| DDB0229424 | ELHSQ | KIMHLDIKPDNMLIN   | PRFDL          | KIADFGFTT       |
| DDB0230050 | QCHVN | GIMHRDLKPDNMLIT   | TNGVL          | KLDFGLSTSY      |
| CK2        | FCHSN | GIMHRDLKPDNMLMID  | HQKRK          | LYLIDWGLAEF     |
| DDB0219953 | YTHSK | GIYHRDLKPDNMLAID  | HSKRK          | LSLIDWGLAEY     |
| ClkA       | SMHKL | SLVHTDLKPDNMLLE   | SSRFYFDNSIPLQF | KNSIDT          |
| DDB0229841 | FMHSA | GVYHRDLKPDNMLIF   | VDFENFNI       | KFTEFNNCFLD     |
| DDB0229333 | YINSA | GVYHRDLKPDNMLIAVN | KEYKT          | KLDFGLSFS       |
| DDB0229296 | FMHSA | GVYHRDLKPDNMLIT   | QNOQ           | LKLEFGLSFC      |
| Dyrk1      | FMSTP | EVDVHCDLKPDNMLLR  | NPKRS          | IKLIDFGSSC      |
| Dyrk2      | FLSKR | NIYHADLKPDNMLLKS  | PTKSGI         | KLIDFGSSCF      |



## Subdomain VIB

## Subdomain VII

|             |                                          |                                 |
|-------------|------------------------------------------|---------------------------------|
| SAPKalpha   | CLHKWD... PPIVHRDLKSLNLLVN.DKWEI         | KVCDFGLSR.FN                    |
| DDB0229849  | CLHNWT... POIVHRDFKSLNLLVN.EDWEC         | KVSDFGLSR.FN                    |
| DDB0229848  | SLHNWT... POVLHRDLKSLNLLVT.ENWTV         | KICDFGLSR.FD                    |
| Phq2        | YLHSMN... PPMVHRDLKTLNLLIS.SDWTA         | KLCDFGLTTRMT                    |
| DDB0229847  | CLHSWK... PVIIVHRDLKSLNLLVS.DNWTT        | KVADFGLSR.FA                    |
| SplA        | YLHGWT... PPIVHRDLSSRNLLLD.HNIDPKNPVVS   | SRQDIKCKISDFGLSRLK              |
| DPYK4-b     | YSHRO... GIIVHRDLTSNNVLLN.FRKKLLNNSNSNDE | QFYDSDEIIAKVCDFGLS              |
| DDB0229872  | YLHTNFK... EGPVHRDLTSSNLLLN.SSYTVA       | KINDFGLSKEM                     |
| DDB0229844  | SLHTMR... PALVHRDIKSONLLIN.SQFDL         | KVADFGLAKP                      |
| ZakA-b      | YLHKO... HTIHRDLTSNNVLLD.FKREILPNOLYG    | SNEFTAKVCDFGLS                  |
| 7TMK1       | YLHDWK... PNPVHRDLSTKNLLLD.ESLTTA        | KVADFGLSK                       |
| rk1         | YLHNST... PVIIVHRDLKSHNLLVD.ENWKV        | KVADFGLST                       |
| rk2         | YLHGST... PVIIVHRDLKSHNLLVD.ENWKV        | KVADFGLST                       |
| rk3         | YLHCCD... PVIIVHRDLKSHNLLVD.EHYRV        | KISDFGLSTRFK                    |
| DDB0214883  | YLHSRN... PVIIVHRDLKTDNLLVD.DSQOV        | KVADFGLAT                       |
| Shk1        | WLHSSN... PVFVHRDLKTSNLLVD.ANLTV         | KVCDFGLSQIKOR                   |
| Shk2        | WLHAS... NLIHLDLKPANLLVD.QNWVV           | KVADFGLSKYMK                    |
| Shk3        | WLHESN... PVFVHRDIKSSNLLVD.ENMRV         | KICDFGLSALKQ                    |
| Shk4        | WLHGI... TRIVHNDLKTANLLVD.INLRV          | KVIDFGFSO                       |
| Shk5        | WLHGIC... NLIHHRDLKLANLLMIS.KDKTV        | KIGDFGFSQVIK                    |
| DDB0229963  | HLHTR... NLIHHRDLKSSNLLMD.KHFNI          | KIADFGLAR                       |
| DDB0231199  | YLHSV... DFVHRDLKAANLLVD.KNNNA           | KVGFDFGLSRV                     |
| DDB0229940  | HLHSI... GVIHHRDLKSLNLLIT.EDFTA          | KVIDFGTSRN                      |
| DDB0218878e | HLHSI... GVIHHRDLKSLNLLIT.EDFTA          | KVIDFGTSRN                      |
| Rck1        | YLHSM... STIHRDLKSMNLLIT.KRLKI           | KVIDFGTSR                       |
| DDB0231197  | FLHSK... NLIHHRDVKGNLLVN.ENWEV           | KLIDFGVSR                       |
| DPYK2       | HLHSI... TIVHRDLTSONLLLD.ELGNI           | KISDFGLSREKS                    |
| DPYK3-b     | HLHSI... QMLHRDLTSKNLLLD.EFKNI           | KIADFGLAT                       |
| Gdt1        | FLQOS... STIOKTLRARNIFLYDTNENAEV         | CAKVLDLTSSTK                    |
| Gdt2        | YLHRN... GIIVHRDLKPENLLIT.SLNPKSL        | VCAKVSDFGTSKE                   |
| Gdt4        | FLHKN... GIIVHRDLKPDNLLIV.SFDPDSS        | ICAKISDFGTCRE                   |
| Gdt6        | FLHSN... DITNCNIKSNLLLLFSTMEKDDV         | CVKISDFGLKKF                    |
| Gdt8        | FLHAS... EIVHGDIKPDNLLVF.SKE.TSG         | VCVKICDFGNSEE                   |
| Gdt9        | FLHOC... GIIVHRDLKPDNLLVF.DINHNP         | VCAKISDFGTSKET                  |
| KinX        | YLHSK... SIIVHRDLKSTNLLVD.KNWKI          | KVCDFGFARIV                     |
| KinY        | YLHSR... DLIFRDLKSKNLLID.DSSSP           | IRGKVCDFGFARILN                 |
| DDB0229853  | YLHSK... KVIIFRDLKAKNLLVD.EIGDG          | LYRAKVIDFGFARIF                 |
| DDB0229863  | FLHAR... GIIVHRDLKSONLLIS.TNRRR          | KLCDLGLARMF                     |
| DDB0229866  | YLHSR... NVIIVHRDLKSTNLLVG.DNWRI         | KVCDMGFARTAOV                   |
| DDB0229851  | YLHEN... GVIIVHRDLKSTNLLVA.ENWVI         | KVCDMGFLARKM                    |
| DDB0229865  | YLHSK... QIIVHRDLKSNLLLLG.RNWTT          | KICDFGFAKEI                     |
| GefX        | FLHAK... KLIIVHRDLKSKNLLLD.EFORI         | RLCDFGFAR.MS                    |
| DDB0229867  | FLHSK... NLIIVHRDLKSKNLLLDISRNI          | KLCDFGFARVGSQYSNGSDSSSSSEDESSEC |
| HH498       | YLHSLK... POIIVHRDLTSONLLID.RNGIA        | KIADFGLSRFK                     |
| GbpC        | HLHSHN... PPIVHRDLKSPNLLNGITEGONS        | VATIIDFGTST                     |
| Pats1       | FLHSSST... PPIIVHRDLKSPNLLA.SINENAO      | TIAKVDFGLS                      |
| QkqA        | YMONQN... PPIVHRDLRSPNIFLK.SLDENSP       | VCAKIADFGLS                     |
| Roco4       | YMONQN... PPIVHRDLRSPNIFLQ.SLDENAP       | VCAKVADFGLS                     |
| Roco5       | HMHGFT... PKIIVHRDLKSPNIFML.SDMNAAV      | VCKVDFGETRA                     |
| Roco6       | FLHSVT... PPLIIVHRDLKSPNILL.SMKDGVY      | TAKVDFGLSRMFI                   |
| Roco7       | FLHSCK... PMLIIVHRDLKSNLLGGSSMDNLVA      | KVGFDFGLSI                      |
| Roco8       | FLHNIT... PPLIIVHRDLKSPNILLA.SHPTNPNE    | ISAKVDFGLSR                     |
| Roco9       | FLHDSR... PSVVHRDLKSPNILL.SKDSLTM        | ECHLCDFGLS                      |
| Roco10      | KLNSHS... PPFLLTNLTSSGILLE.KSNDHQSSGNGL  | IEPFVNAKIIDFSQS                 |
| Roco11      | YMONQN... PPIVHRDLRSPNIFLF.SLDENAP       | VCAKVADFGLS                     |
| DPYK3-a     | YLHSK... DVAHCNLTISRSTYLD.RFOI           | VKVSF                           |
| DDB0229956  | YLHSL... GIIVHRDLKPGNLLID.QDWNII         | RISDFGLSR                       |
| DDB0229957  | YLHSL... GIIVHLDLDMKSPNLLVS.SLSTSAK      | VNIKVADFNTCINRSRITAGFF          |
| DDB0220138  | HLSTYEP... PIIVHTDLKTKNLLVT.NALKI        | KIADFGLASFAKSLTTIINNNTNNTAT     |
| DDB0220436  | YLHNEI... GIIVHFDLKPSPNILLKN.SKNNK       | LKLIDFGLSKFLNN                  |
| DDB0230133  | FLHRN... EILHLDLKPONFLVV.SISPEAP         | VSIKLAADFGLA                    |
| DDB0229871a | YLHTYS... PPIIVHRDLKSLNLLVD.NNFNV        | KVSDFGLSRFIS                    |
| DDB0229955  | YLHLS... GVIIVHRDIKSLNLLLD.EHMNV         | KICDFGLSKL                      |
| Bud32       | ILHEM... NVIHGDLTTSNMLLR.ESTNE           | LVFIDFGLSYT                     |
| DDB0231196  | SLREA... GMYHRDFKTANFLVS.NTGKI           | LISDFGTSR                       |





Subdomain VIII

Subdomain IX

|             |                                                                                  |                                             |
|-------------|----------------------------------------------------------------------------------|---------------------------------------------|
| YakA        | .....YEKSTLYTYIQSRHYRSPEVLV.....                                                 | .....GTVVYCASIDMWSLGCISAEFLGL.....          |
| Prpf4B      | .....EIHSEITPYLVSREYRAPEIIL.....                                                 | .....GHKYDYSIDVWSVCCLAFFFTCK.....           |
| GSK-3       | .....LIKGETNVSYICSRHYRAPELIF.....                                                | .....GSTNYTTTIDVWSLGCVLAEILLGQ.....         |
| GlkA        | .....LESNHTSMSYICSRHYRAPELIV.....                                                | .....GCSNYTTKIDVWSIGCILAEMLIGK.....         |
| Erk1        | .....DATHQGFMEYVATRWYRAPEVIL.....                                                | .....SWNKYTKAIDVWSVGCIFAFILGRK.....         |
| Erk2        | .....ESIAEANPVLTEYVATRWYRAPEILL.....                                             | .....GSTKYTKGVDVWSIGCILGELGEEK.....         |
| DDB0229430  | .....IESKPPFTDYISTRWYRAPEVLL.....                                                | .....RCTYVYVAPIDVWVAGTAMAEVYSLK.....        |
| Sky1        | .....WTDKHFTDDIQ.TROYRAPEAIV.....                                                | .....KAKWGTPVDVWSAACMAFFATCD.....           |
| DDB0230051  | .....FGNSITQPTYSNPSSYSVLSPEYICSVLDKENHSKLSNEIDWKAFDVWSIGCIFLELYYKK.....          | .....FGRVINTESDVWSLGVIFVIYLLQTKOE.....      |
| DDB0230126  | .....GNVDSEPAEDG.MIYGSPEI.....                                                   | .....KYNKQTTAIDVWSVGVILLCLMSGR.....         |
| Cdc7        | NNNNNNNTN (64) PSTNENGTTSNASSTSNNTSSSSSSSNKSKNLRNDPKPQAPRAGTRGFRAPEVLL.....      | .....RTK.....                               |
| DDB0229971  | .....IKESDKRYSVVGTPVWMAPEVIE.....                                                | .....ISGHCOVSDVWSLGCITIEFLFTSY.....         |
| DDB0229896  | .....KFDDTSAAAVVGTPVWMAPEVIE.....                                                | .....LNGATTKSDVWSVGCITVIELLTCG.....         |
| DDB0229877  | .....YSAIDRKLTVVGTPVWMAPEVIO.....                                                | .....MDMNAARSTACD VWSLGCITLLEMLTGN.....     |
| DDB0231212  | .....DLSSDNPDDTFAGTPVWMAPEVIO.....                                               | .....MQGISTACD VWSLGCITIEILLTCT.....        |
| DDB0229915  | .....DSESQLRFSVVGTPVWMAPEVIE.....                                                | .....ISGCSSASD VWSLGCITMIELLTCN.....        |
| FNIPK-A     | .....CDGDSKYYSLVGTSTHMPPEVALR.....                                               | .....NNTACRKS D VWSLGCITIEMAGCN.....        |
| FNIPK-B     | .....PSNDGSKCYTQCGSIGYIPPEIKL.....                                               | .....GGQCGRKS D VWSLGCITLIVKMLGCE.....      |
| FNIPK-C     | NNNNNNNANN (28) GGGGGGEASITSTISTILSGSSSSQLSTPSTSLSSFSLEINLNDSSCYLLIPEIRN.....    | .....QQKITSKGLSKKSD VWSLGCITLIVKMLGCE.....  |
| FNIPK-D     | .....INF.....                                                                    | .....LNI.....                               |
| FNIPK-Ea    | .....LDSEVNSNIIGVTEHMAPEIKLK.....                                                | .....NGKLGYS D VWSLGCITLIVKMLGCE.....       |
| FNIPK-Eb    | .....IEKNSKYYSFVGTDSHMAPEVKLO.....                                               | .....NGKAGSKSD VWSLGCITLIVKMLGCE.....       |
| DPYK4-a     | .....DDGDNICKESSFAITGHTYMAPEVKK.....                                             | .....LHRSTKKS D VWSLGCITLIVKMLGCE.....      |
| ZakA-a      | NNN.....NNNNNNNNNNNNINNNNNNDLNGSGSGISTYLNQYKQSSFAITGHTYMAPEVKK.....              | .....NYRATRKS D VWSLGCITLIVKMLGCE.....      |
| DDB0230002  | .....GDLKRDRHYG.....                                                             | .....TYLPDECIL.....                         |
| DDB0229378  | .....NIINKTVKLOTISSVGTLYMAPEVILL.....                                            | .....NNKGSNSSLD VWSLGCITLIVKMLGCE.....      |
| Mek1        | .....QHTLSKAVTWVGTVMSPERTS.....                                                  | .....GRSYFDS D VWSLGCITLIVKMLGCE.....       |
| MEKKalpha   | .....SGIVSQFKSMQGTVMMAPEVIK.....                                                 | .....QTGHGRSSD VWSLGCITLIVKMLGCE.....       |
| DDB0229911  | .....IDTGETSRNTFVGTVMMAPEVIME.....                                               | .....QVNYDYAV D VWSLGCITLIVKMLGCE.....      |
| DDB0230012  | .....EKNTCCSRKTIIVGTVMMAPEVITS.....                                              | .....ERGNQGV D VWSLGCITLIVKMLGCE.....       |
| MkcA        | .....NLSKGERIRMCSPVWMAPEVIO.....                                                 | .....QKQHGTC D VWSLGCITLIVKMLGCE.....       |
| MkcB        | .....DVATSTPMHMVGSVWMAPEVIO.....                                                 | .....QKYHSTPVD VWSLGCITLIVKMLGCE.....       |
| MkcC        | .....DANERKLVHMAGSPVWMAPEVIR.....                                                | .....GESYGCPT D VWSLGCITLIVKMLGCE.....      |
| MkcD        | .....SIEKEEINMLGSPVWMAPEVIR.....                                                 | .....GNPHSLST D VWSLGCITLIVKMLGCE.....      |
| MkcE        | .....LTHLKQDINMCGSPVWMAPEVIR.....                                                | .....DKAHLGAV D VWSLGCITLIVKMLGCE.....      |
| MkcF        | .....SVEKGGSOHMGSPVWMAPEVIR.....                                                 | .....GEECSYPS D VWSLGCITLIVKMLGCE.....      |
| PakA        | .....TQIRQERNVSVGTVMMAPEVIR.....                                                 | .....GNNYDFKVD VWSLGCITLIVKMLGCE.....       |
| PakB        | .....TKSKQKRVTVGTVMMAPEVIR.....                                                  | .....GQNYDRKVD VWSLGCITLIVKMLGCE.....       |
| PakC        | .....TQKQKRVTVGTVMMAPEVIR.....                                                   | .....GHDYGVKVD VWSLGCITLIVKMLGCE.....       |
| PakD        | .....TRKKLQRNSVGTVMMAPEVIR.....                                                  | .....GNQYNHKKVD VWSLGCITLIVKMLGCE.....      |
| PakE        | .....QTEYGOANVYI GSPVWMAPEVIR.....                                               | .....KAPYNSKAD VWSLGCITLIVKMLGCE.....       |
| PakF        | .....NGALDQSKEMI GTPVWMAPEVIL.....                                               | .....KKNYDYKAD VWSLGCITLIVKMLGCE.....       |
| PakG        | .....DSLGEASQLV GTPVWMAPEVIL.....                                                | .....RONYNNKCD VWSLGCITLIVKMLGCE.....       |
| PakH        | .....IQSTFSKGS IAGTPVWMAPEVIL.....                                               | .....QTDYNNKID VWSLGCITLIVKMLGCE.....       |
| Krs1        | .....SDTMAKRQTVI GTPVWMAPEVIO.....                                               | .....EIGDYKAD VWSLGCITLIVKMLGCE.....        |
| DDB0216375  | .....SERTRRKNTVI GTPVWMAPEVIO.....                                               | .....EVGYDNKAD VWSLGCITLIVKMLGCE.....       |
| Svka        | .....TDQMTKRNTFV GTPVWMAPEVIO.....                                               | .....QTGYDSKAD VWSLGCITLIVKMLGCE.....       |
| DDB0216374  | .....VNTGFKQKTVV GSPVWMAPEVIR.....                                               | .....PKGSNGYDSKAD VWSLGCITLIVKMLGCE.....    |
| DDB0216379  | .....AEQOQKMNVTI GSPVWMAPEVIR.....                                               | .....GOGYDQKAD VWSLGCITLIVKMLGCE.....       |
| DDB0216377  | .....FNTFSKRNTFV GTPVWMAPEVIO.....                                               | .....ENKYDGKAD VWSLGCITLIVKMLGCE.....       |
| DDB0216378  | .....LDKSSKRNTFI GTPVWMAPEVIR.....                                               | .....RSNPVYDTKAD VWSLGCITLIVKMLGCE.....     |
| DDB0230010  | .....CSLGRGRTRMCGTVMMAPEVIR.....                                                 | .....REPYDTOS D VWSLGCITLIVKMLGCE.....      |
| DDB0229972  | .....SAIEPSIRFSLNGYVWMAPEVIR.....                                                | .....MKPFNHKVD VWSLGCITLIVKMLGCE.....       |
| DDB0229973  | .....LGNVTLKTCI GTPVWMAPEVIR.....                                                | .....DGGNSGYSLKAD VWSLGCITLIVKMLGCE.....    |
| IfkA-a      | .....GRNIKIFDHFELKLSLKNLNSWISS (28) NQINNEIDRREDINLGVVLEMLCCSGLAN (22) FIQP..... | .....IDRREDINLGVVLEMLCCSGLAN (22) FIQP..... |
| SAMK-A      | .....IDDSTNLKTLCKKPFVWMAPEVIR.....                                               | .....QEIQIFSEKTD VWSLGCITLIVKMLGCE.....     |
| SAMK-B      | .....IENNTNFKTACCSVWMAPEVIR.....                                                 | .....KSTSDFSRKCD VWSLGCITLIVKMLGCE.....     |
| SAMK-C      | .....NHNHNHNHNHNHDNDNDNDNTNVKIKTQCMERWVWMAPEVIR.....                             | .....EPPHESKES D VWSLGCITLIVKMLGCE.....     |
| SAMK-D      | .....IDLLTNQKTOFISVWMAPEVIR.....                                                 | .....KTKNKISKEAD VWSLGCITLIVKMLGCE.....     |
| DDB0230038  | .....KFMSFOLKQQLLHTQ.....                                                        | .....YLAPELNFNL.....                        |
| DDB0230124  | .....FVKDGI FRTGQSSPYLAPELFNSN.....                                              | .....CNOYDNTNSD VWSLGCITLIVKMLGCE.....      |
| DDB0229871b | .....TOENEESLKEIKGNFLYSPELIS.....                                                | .....LNTYSNKS D VWSLGCITLIVKMLGCE.....      |
| DDB0229850  | .....LNTEYINSNNQNKSAFCSPESSDFQDID.DDYTSLSSSITKSD VWSLGCITLIVKMLGCE.....          | .....EYS.....                               |
| ARCK-1      | .....TESNQETLNKTRGTSVYCAPEVFE.....                                               | .....GKEYNERS D VWSLGCITLIVKMLGCE.....      |

Subdomain VIII

Subdomain IX

|             |                 |                          |                              |                             |
|-------------|-----------------|--------------------------|------------------------------|-----------------------------|
| SAPKalpha   | TGSNLETLVKMRGT  | FAYCAPEVYY               | GEQFSGKSDVYSIAVILWELVTRCING  | RYE                         |
| DDB0229849  | TADNLETLKIRGT   | FAYCSPEVAVG              | NGSLYTTKSDIYSGIVFWELVTRVING  | EYS                         |
| DDB0229848  | TGSNLETLGKLRGT  | YAYVAPEVYF               | GKKYTTKSDVYSMGIIILWEMTYRCIKG | THL                         |
| Phq2        | MTNVSTLGMRLGT   | MAYTAPEIYD               | GLLFNTKSDVYSLGVMWEAIVORCISG  | VYL                         |
| DDB0229847  | TAKSASNRTRGT    | FAYCAPEVYF               | YGIHTTKGDIFSGIILWELAVRCSIKS  | KYE                         |
| SplA        | MEQASQMTQSVGC   | IPYMAPEVFK               | GDSNSEKSDVYSYGMVLELLETS      |                             |
| DPYK4-b     | SNQSESKKLRGS    | IHYMAPENLN               | GSPINEKSDIYSGFLLVWOMFS       |                             |
| DDB0229872  | KPGPTEMTAAMGS   | LAWMAPECFK               | AENYTEKVDVYSFAIILWELVTR      |                             |
| DDB0229844  | TELOQGSNSTIKGT  | MAYCAPELYN               | GISYSEKADVYSLGIVLWELVTRVITG  | KYQ                         |
| ZakA-b      | SNQSESKKLRGS    | IHYMAPENLN               | GSPINEKSDIYSGFLLVWOMFS       | Y                           |
| 7TMK1       | EOGFE.MTSTVGH   | LCYQAPVFI                | GELYTPKADVYSFGIILWELVTR      |                             |
| rk1         | IEOQGATMTACGT   | PCWTSPEVLR               | SORYTEKADVYSFGIILWELVTR      |                             |
| rk2         | IEOQGATMTACGT   | PCWTSPEVLR               | SORYTEKADVYSFGIILWELVTR      |                             |
| rk3         | KHLDKKTAMTPVGT  | PCWTAPEVLR               | NDPYTEKADVYSFAIVLWELVTR      |                             |
| DDB0214883  | VKSHTFAKTMCGT   | TGWVAPEVLA               | EEGYTEKADVYSYAIVLWELVTR      |                             |
| Shk1        | GENLKDGDGAKGT   | PLWMAPEVLO               | GRLFNEKADVYSFGIILWELVTR      |                             |
| Shk2        | PDSKDKLLGOAGS   | PLYMAPEMLV               | NOPYDGVKDVYSFILLWELVTR       |                             |
| Shk3        | KHKMLKDQSSAKGT  | PLYMAPEVMM               | FKEFNESSDVYSFGIILWELVTR      |                             |
| Shk4        | IKEGEEFDQKAAKGT | PLWMAPEVMM               | GPNYNEKADVYSFGIILWELVTR      |                             |
| Shk5        | TGTTLSQDQKPKGT  | ALYMAPEVMM               | KHEFNEKADVYSFGIILWELVTR      |                             |
| DDB0229963  | ETSFTQMTTIGT    | VAWTAPEILL               | HESYNQKADVYSYAIVLWELVTR      |                             |
| DDB0231199  | IDNNFNMTAVAGT   | PKWESPECLM               | GEAYTSASDVYSYGMMLFELATG      |                             |
| DDB0229940  | VDLAKQMTLNLGT   | SCYMSPELFF               | GNGYDETCADVYAFGIVLWELVTR     |                             |
| DDB0218878e | VDLAKHMTMNLGT   | SCYMSPELFF               | GNGYDETCADVYAFGIVLWELVTR     |                             |
| Rck1        | VANKYNMTHVGT    | QAWMAPEIFT               | SRTYTNKADVYSYAIILWELVTR      |                             |
| DDB0231197  | FVEARLGYTIVGT   | PNYMAPELFN               | GOPYHOPADVYSFGVLLWELVTR      |                             |
| DPYK2       | REGSMTMTNGGIC   | NPRWRPELTK               | NLGHYSEKVDVYCFSLVWELVTR      |                             |
| DPYK3-b     | TLSDDMTLSGITN   | PRWRPELTK                | GLVYNEKVDVYSFGLVVYELVTR      |                             |
| Gdt1        | IKGLACNNYIERVDT | PNLTREISIRDPK(29)        | NNSNNSSSLKYNTHSFAVLSYELVTR   |                             |
| Gdt2        | TNERYNLQTRRG    | VAYMSNEILS               | QGSYTKSTDIYSGMILCYELVTR      |                             |
| Gdt4        | INGKHELNSKAGT   | TRYMSPEILE               | GLPYTYSTDVYSFAIILWELVTR      |                             |
| Gdt6        | EVQONEKEIFK     |                          | DEKDOKLIDVYEFGITVYELVTR      |                             |
| Gdt8        | LGEKESKSKPDS    | TMNYLPNEVFD              | GEGYQKSADVYAFGVSLVYELVTR     |                             |
| Gdt9        | NEFSNKNTNCVGT   | PIYMSNEILE               | KKTYDNSTDVYSFAVILWELVTR      |                             |
| KinX        | EEDNNKSMTICGT   | DNWMSPEMIT               | GLDYDERSDIFSGIVLWELVTR       | P                           |
| KinY        | KKQOQNRHLSICGT  | DSIMAPELIL               | GMEYDESVDIFSGVLLWELVTR       | SK                          |
| DDB0229853  | DGKDTNNTLICGS   | ENTMSPEVIV               | GSSYNDSCDVYSYGVLLWELVTR      |                             |
| DDB0229863  | EERINKRYTCVGT   | EIWMAPVCL                | DQSYSTADVYSFGIVLWELVTR       | PD                          |
| DDB0229866  | GGGSRAKRTMTICGT | TNCMAPEVVL               | GODYNEACDVYSFGIVLWELVTR      | RPS                         |
| DDB0229851  | DKSEKSMTICGT    | DDWMAPEVLI               | GEEYDASCADVYSFGVLLWELVTR     |                             |
| DDB0229865  | TIQNPLSMTICGT   | DEFMSPEVIL               | GIQYSYADIVYSFGVLLWELVTR      | R                           |
| GefX        | EQTKKSRRHMTMCGT | TGWVAPEILL               | GMSYDTSADVYSFGVLLWELVTR      |                             |
| DDB0229867  | VNGAAGGGGDDVYK  | NNNGKPNYRLRRMSICGT       | PSFMPPEILL                   |                             |
| HH498       | NDIGDKTMTSIC    | NPRFRSPEVTK              | GQKYSEKVDVYEFGITVYELVTR      |                             |
| GbpC        | ALYGGAAALIRCVD  | QPLWLGPEVLA              | GTAYSEPSDVYSFGIILWELVTR      |                             |
| Pats1       | GLOHTITNRGVEN   | PLWLAPEILN               | KTKEASTOTDVYAFGIVLWELVTR     |                             |
| QkqA        | QOSVYSVSGLLGN   | FQWMAPEITIG              | VEDESYTEKVDIYSGFAMILVTR      |                             |
| Roco4       | QOSVHSVSGLLGN   | FQWMAPEITIG              | AEEESYTEKADIVYSFAMILVTR      |                             |
| Roco5       | VVTSALGRDKLSN   | PIWLSPEIMR               | GDEYTEKADVYSFGIVLWELVTR      |                             |
| Roco6       | QALKHKLNRNFPVGN | ITWVAPEILL               | EEEYTVKSDVYAFGLWELVTR        |                             |
| Roco7       | KPIGKEVKGRKVVN  | WRWLAPECMG               | DGOYTEKIDIVYSYAIVLWELVTR     |                             |
| Roco8       | SIVQNFSSKVVND   | PTWQSPVLR                | GMEYNEKSDIYSGMILWELVTR       |                             |
| Roco9       | GFSTTVANRSVQNP  | VWLAPEVIN                | NELCSDKSDVYAYGVILWELVTR      |                             |
| Roco10      | SFLPSLFPSTSTTP  | KSYHSPVLR                | KLNYHENSADVYSFGIILWELVTR     |                             |
| Roco11      | QOSLYSVSGLLGN   | FQWMAPEITIG              | AEEESYTEKIDIVYSFAMILVTR      |                             |
| DPYK3-a     | PKLNATDLNPNPAIE | PRYMAPEMTR               | MEEDQISCSIDVYAFVWELVTR       |                             |
| DDB0229956  | VVDNR.MTKTVGT   | PCYMAPEVLR               | GLTDYSQOADVYSFAVILWELVTR     |                             |
| DDB0229957  | NRHTGSGDNNKVEK  | SKKGTTLWMAPEVIR          | GAMYSEKADVYSFAIILWELVTR      |                             |
| DDB0220138  | SSTTTSSANGANSIS | NNNNNTSVDSQRLAYAFYAPEILN | SKHFSEKSDVYSFGIILWELVTR      |                             |
| DDB0220436  | NNQNNNNSLNMGS   | YRYSPELLECN              | NQNNLINKSDVYSFGIILWELVTR     |                             |
| DDB0230133  | TSSRSFYGPTVEGS  | FLYMSPEVFT               | QKKFSRAADVYSYGAELVTR         |                             |
| DDB0229871a | GGIGSSAKTFCG    | LSWLAPEVFN               | GSGYTTKVDVYSFGIILWELVTR      |                             |
| DDB0229955  | KSKSTEMTKSICGS  | PIWMSPELLM               | GEDYTEKVDVYAFGLWELVTR        |                             |
| Bud32       |                 |                          | SNSVEDKAVDLY                 | VLERA                       |
| DDB0231196  | DENEKRLNTFAKTI  | GMWYRCPR                 | LDGCS                        | EKTLTHYNEKSEIYSLGIIILWELVTR |

Subdomain VIII

Subdomain IX

DDB0229339 ..... DENEKRFNTFAKTI~~G~~TLWYRC~~P~~RLGDCSGD..... EKTLNHYNEKSE~~T~~YSLGII~~L~~WELICIAMTGT~~Y~~V... SPK  
DDB0231195 ..... TESNGCTLQOIR~~G~~TNLHIA~~P~~ECYK..... GFLFSSQS~~D~~IFSV~~G~~ISL~~Y~~QLAYKL~~V~~YG..... KFV  
DDB0229335 ..... ETNENT.LQKYR~~G~~TSVFI~~P~~PELND..... NILYNEKS~~D~~ISL~~G~~VSF~~M~~MLLYK~~V~~VYG..... KME  
DDB0216331 ..... KYENS.MSGVA~~G~~TY~~Y~~LS~~P~~EILL..... NKNYSRPA~~D~~IFSL~~G~~CIF~~Y~~EMYTLN~~L~~.....  
DDB0229344 ..... AHHTGSIHSETV~~G~~TY~~C~~SS~~P~~EILL..... STYDKT~~T~~DI~~F~~SL~~G~~CFI~~Y~~ELITL~~K~~.....  
DDB0231281a ..... TLYTQNKSTLI~~G~~TNO~~Y~~IA~~P~~EVIE..... KKGHTNL~~I~~DI~~F~~SL~~G~~KTL~~L~~LS~~S~~KRN.....  
DDB0230037a ..... QVKTINSSTLI~~G~~TNO~~Y~~IA~~P~~DVIK..... RGGYTGT~~I~~DI~~F~~CL~~G~~KTL~~L~~LL~~L~~LN.....  
DDB0219988a ..... MVIDTQKNTLI~~G~~TNO~~Y~~MA~~P~~EIDL~~G~~..... GYTKCV~~D~~IFSL~~G~~CT~~M~~LSL~~I~~IT.....  
DDB0231281b ..... ELKNDQDLYYSK~~D~~TL~~G~~Y~~O~~S~~P~~EI~~Y~~SSEL..... RGNGDI~~K~~NQ~~P~~Y~~K~~M~~D~~VF~~G~~IR~~C~~V~~M~~K~~Y~~LS~~K~~.....  
DDB0230037b ..... GKHLENYSRD~~G~~T~~F~~G~~Y~~~~O~~A~~P~~EI~~Y~~REEL..... RGDGDI~~K~~T~~O~~K~~Y~~K~~M~~~~D~~VF~~G~~SL~~G~~CT~~M~~AFL~~I~~KK.....  
DDB0219988b ..... DFGFILKTNES~~G~~SK~~M~~~~O~~A~~P~~EI~~Y~~QE~~E~~YRS..... KENDIT~~N~~Q~~H~~Y~~K~~L~~D~~IFSL~~G~~F~~T~~L~~S~~HLM~~K~~.....  
DDB0231182 ..... LPSNELIYNQRNDR...SKEFC.....FYS~~D~~LY~~S~~F~~S~~SSL~~N~~K~~I~~K~~I~~KE.....  
IksA ..... LAPPLYKNNIKRTGNT~~G~~TIE~~V~~LA~~P~~ELL~~O~~KGV.....NGEYNSDYDEK~~C~~DI~~F~~SL~~G~~ILL~~Y~~Q~~M~~AYGT.....  
IreA ..... LDNDDQ.SLTFTSDSHGW~~O~~PAE~~Y~~LN.....GTNRNTK~~K~~V~~D~~IFSL~~G~~CV~~V~~Y~~L~~IT~~G~~A.....  
IrlA ..... VETSYSF.TNNAPT~~G~~QEG~~V~~HP~~I~~EVLO.....EKRKTKS~~V~~DIFSL~~G~~CIL~~F~~YLL~~T~~NG~~Q~~.....  
IrlB ..... VESSYSF.TSNIPT~~G~~GG~~V~~HP~~F~~EVLO.....SKRMTKS~~V~~DIFSL~~G~~CIL~~F~~YLL~~T~~NG~~Q~~.....  
IrlC ..... VTSSYSF.TMHAPT~~G~~QEG~~F~~HPA~~E~~VLL.....EKRKTKS~~V~~DIFSL~~G~~CIL~~F~~YLL~~T~~NG~~Q~~.....  
IrlD ..... VTSSYSF.TMHAPT~~G~~QEG~~F~~HPA~~E~~VLL.....EKRKTKS~~V~~DIFSL~~G~~CIL~~F~~YLL~~T~~NG~~Q~~.....  
IrlE ..... VSSTYNFSTNAIPT~~G~~QD~~G~~Y~~H~~P~~V~~EVLL.....EKRKTKS~~V~~DIFSL~~G~~CL~~I~~Y~~F~~IM~~T~~NG~~A~~.....  
IrlF ..... VESSYSF.TTNVPT~~G~~GG~~V~~HP~~V~~EVLO.....SKRMTKS~~V~~DIFSL~~G~~CIL~~F~~YLL~~T~~NG~~Q~~.....  
DDB0216373 ..... NRKDALSLODEVEQNT~~P~~FP~~Y~~RA~~P~~EL~~F~~DIPS.....DCQIDERI~~D~~V~~W~~AL~~G~~CL~~L~~Y~~T~~MAY~~N~~N.....  
DDB0229347 ..... ATERGKAEDDINMFT~~L~~FP~~Y~~RA~~P~~EM~~V~~DL~~Y~~R.....GOIIDEK~~V~~D~~V~~W~~AL~~G~~CL~~L~~F~~K~~M~~A~~F~~Y~~V~~.....  
DDB0229350 ..... KNKTEMQNAEDDISRHT~~L~~Q~~V~~RA~~P~~EI~~V~~DF~~Y~~R.....SPVINEK~~I~~D~~I~~W~~AL~~G~~CL~~L~~Y~~K~~L~~L~~F~~Y~~V~~.....  
Nek2 ..... LNESLYAHTFV~~G~~TP~~Y~~Y~~M~~S~~P~~EQ~~I~~H.....GLKYNE~~R~~S~~D~~V~~W~~SV~~G~~CL~~I~~Y~~E~~MAT~~L~~S.....  
Nek3 ..... NSETSLASTVL~~G~~TP~~Y~~Y~~L~~S~~P~~E~~L~~IO.....NEKGYDH~~K~~S~~D~~I~~W~~SL~~G~~CV~~L~~Y~~E~~L~~T~~TL~~K~~.....  
Nek4 ..... LNSSEFAKMI~~G~~TP~~Y~~Y~~M~~S~~P~~E~~C~~FG.....SRAYDF~~K~~S~~D~~I~~W~~SL~~G~~CIL~~F~~Y~~L~~M~~T~~L~~K~~.....  
DDB0229345 ..... SETDLYANTTAG~~T~~PQ~~V~~YS~~Y~~E~~I~~CN.....KKPYTN~~K~~T~~D~~I~~W~~SL~~G~~V~~V~~L~~Y~~E~~L~~M~~T~~LS.....  
Ifka-b ..... INLSSSTNSTAQQT~~P~~MW~~D~~LNDEN~~L~~SMT~~G~~GV~~G~~TP~~F~~Y~~C~~CP~~E~~ILE.....KNTKHYG~~T~~K~~V~~D~~M~~Y~~S~~L~~G~~I~~F~~F~~E~~M~~C~~F~~Q~~.....  
IfkB ..... INLSSSTNSTAQQT~~P~~MW~~D~~LNDEN~~L~~SMT~~G~~GV~~G~~TP~~F~~Y~~C~~CP~~E~~ILE.....KNTKHYG~~T~~K~~V~~D~~M~~Y~~S~~L~~G~~I~~F~~F~~E~~M~~C~~F~~Q~~.....  
DDB0216407 SVIN...TKQQQQQQPON~~Y~~WE~~D~~E~~V~~E~~G~~QQQQQQQQQQQQQQQQQQQ~~Q~~H~~T~~A~~R~~V~~G~~T~~L~~Y~~S~~T~~S~~P~~E~~Q~~E~~A.....GTNGD~~S~~A~~Y~~DD~~K~~V~~D~~M~~Y~~S~~L~~G~~I~~V~~F~~F~~E~~M~~W~~Y.....  
DDB0229432 IPISTPPTS (21) AAT~~H~~L~~N~~S~~S~~L~~G~~CT~~I~~SS~~S~~S~~S~~T~~T~~TAT~~A~~T~~T~~S~~T~~P~~F~~M~~F~~Y~~N~~S~~I~~V~~N~~T~~V~~G~~V~~T~~L~~Y~~S~~A~~S~~P~~E~~Q~~L~~S~~N~~K~~G~~V~~F~~.GGGGY~~T~~N~~T~~W~~Y~~T~~N~~K~~T~~D~~I~~Y~~S~~C~~G~~I~~L~~F~~E~~M~~I~~V~~G~~.....  
DDB0220611e ININQQLQQ (>63) PTG~~S~~Q~~S~~IP~~S~~TP~~S~~SL~~S~~S~~S~~ST~~T~~PS~~V~~ST~~G~~TS~~L~~RS~~L~~E~~H~~CK~~H~~TS~~A~~V~~G~~T~~L~~Y~~S~~S~~P~~E~~Q~~.....KGLYNE~~K~~T~~D~~I~~Y~~S~~L~~G~~I~~L~~F~~E~~L~~Y~~F~~.....  
DDB0220652 ..... NNNNNINNNNNNNK~~V~~G~~L~~L~~G~~T~~Y~~L~~Y~~S~~S~~NE~~Q~~EQ.....GDNYN~~Q~~K~~T~~D~~I~~Y~~S~~V~~G~~V~~I~~F~~F~~E~~M~~L~~S~~Q~~F~~K.....  
PLK ..... VEHGERKKTIC~~G~~TP~~N~~Y~~I~~A~~P~~E~~I~~L~~D~~.....NSNGHS~~Y~~E~~V~~D~~V~~W~~S~~I~~G~~I~~L~~Y~~T~~L~~L~~I~~G~~K.....  
Vps15 ..... FIPEDNPADFS~~F~~Y~~F~~DT~~S~~GR~~R~~TC~~V~~I~~A~~P~~E~~R~~F~~Y~~E~~T~~N~~R~~G~~.....APSNNE~~L~~TP~~K~~M~~D~~I~~F~~SL~~G~~CV~~L~~Y~~E~~L~~F~~LD~~G~~.....  
TBCK ..... LSDHGENVSF~~P~~IC~~N~~L~~L~~Y~~L~~S~~P~~ES~~I~~L.....RGAKGS~~N~~TK~~A~~D~~V~~W~~AL~~G~~C~~IL~~L~~H~~I~~CL~~G~~Y.....  
TtkA ..... DDTTNIVRESO~~I~~GT~~I~~N~~Y~~S~~P~~EAL~~I~~D~~T~~SO.....GGPKQ~~C~~M~~K~~L~~G~~RAS~~D~~I~~W~~SL~~G~~CIL~~Y~~E~~M~~A~~F~~G~~Y~~.....  
DDB0220004 ..... LNEATNTKIYSE~~G~~DS~~R~~Y~~L~~S~~R~~ELL~~H~~.....DDMSAL~~K~~K~~S~~D~~I~~F~~S~~L~~G~~C~~I~~L~~Y~~E~~L~~AR~~C~~K.....  
DDB0229384 ..... NNTSMDSDCNNLSL~~D~~EDD~~I~~FF~~D~~LE~~G~~DS~~R~~Y~~L~~A~~Y~~E~~F~~LL.....DKQ~~I~~S~~K~~PS~~D~~I~~F~~S~~L~~G~~V~~T~~F~~F~~E~~M~~V~~T~~G~~N~~E~~M~~P~~.....TNG  
DDB0216398 ..... TTTGGDDSE~~G~~Q~~I~~Y~~M~~A~~P~~ELL~~N~~.....DIHTPS~~A~~D~~I~~F~~S~~L~~G~~I~~T~~Y~~E~~MAT~~N~~Y.....  
Scy1 ..... INNSILRNHNDLIPN.K~~V~~K~~S~~P~~E~~IM~~K~~S~~Q~~.....WQIQ~~O~~Q~~S~~PS~~Y~~S~~I~~D~~S~~W~~M~~L~~G~~CL~~M~~Y~~F~~EC~~N~~T.....  
Scy2 ..... REYQYISGGGGGESSN~~S~~NY~~L~~P~~O~~LD~~Y~~L~~A~~P~~E~~F~~I~~S.....QRKFET~~N~~S~~D~~I~~F~~S~~L~~G~~I~~R~~L~~I~~F~~E~~L~~S~~I~~N~~L~~E~~Q~~AL~~D~~SH~~L~~IS~~Q~~.....  
SLOB1 ..... LGMKPLFND~~Y~~I~~Y~~G.....IG.L~~P~~OS~~F~~K~~D~~N~~L~~E.....  
SLOB2 ..... LGLEPRFS~~D~~F~~I~~R~~O~~.....HNEKID~~P~~.D~~V~~L~~S~~F~~S~~GL~~V~~L~~F~~E~~M~~A~~C~~G.....  
DDB0229334 ..... NFLNQD~~Y~~Q~~S~~P~~E~~V~~L~~K.....SNNFTH~~K~~S~~D~~I~~W~~S~~E~~G~~F~~I~~L~~L~~K~~M~~I~~D~~K~~.....  
DDB0231326 ..... TODVEGYTTRN~~R~~CT~~E~~F~~I~~K~~S~~PE~~M~~L~~T~~I~~A~~YAS (7) DRR~~K~~V~~G~~S~~N~~TAS~~D~~V~~W~~S~~L~~G~~C~~L~~F~~Y~~E~~L~~L~~T~~G~~D.....  
DDB0231559 ..... CTNLNSSLKNGA~~C~~TV~~C~~Q~~A~~PEAS~~R~~.....GKATIO~~S~~D~~I~~Y~~S~~L~~G~~V~~V~~L~~F~~E~~L~~CGA~~I~~PK~~Y~~N~~Y~~.....NYF  
DhkG-a TMID.....NIDL~~T~~NS~~Y~~NNNN~~S~~ST~~N~~N~~I~~FF~~N~~F~~N~~ND~~Y~~DEESINEL~~F~~K~~S~~Y~~P~~DL~~S~~R~~F~~ST~~S~~Y~~Y~~I~~S~~P~~E~~D~~T~~G~~R~~T~~I~~H.....PVDE~~K~~S~~D~~I~~Y~~S~~L~~G~~V~~T~~F~~F~~E~~L~~L~~T~~G~~R.....  
DDB0231198 ..... LVHDNNFTST~~F~~HT~~D~~Y~~V~~PE~~E~~Y~~G~~.....RFQYD~~G~~E~~K~~V~~D~~I~~Y~~S~~F~~G~~C~~T~~F~~F~~E~~M~~V~~T~~K~~H~~R~~.....  
DDB0231179 ..... DVPIRLCDT~~N~~CHEN~~K~~SL~~E~~RY~~W~~D~~Y~~N~~Q~~C.....RIKT~~T~~S~~F~~I~~R~~D~~N~~E~~D~~I~~F~~SL~~G~~V~~L~~I~~F~~E~~M~~L~~T~~G~~E~~.....V  
DDB0231335 ..... SNIGDDR~~K~~G~~Y~~D~~I~~SN~~L~~K~~S~~I~~Y~~D~~F~~F~~N~~Y.....  
7TMK2 ..... NPTALQQQKLNN~~F~~OS~~A~~T~~T~~T~~T~~T~~T~~TE~~O~~T~~T~~E~~P~~IE~~V~~AA.....TTTP~~O~~T~~I~~HS~~A~~F~~O~~H~~D~~I~~L~~S~~F~~G~~F~~I~~V~~L~~D~~F~~L~~T~~S~~N.....  
DDB0229381 ..... GNDSAEIHSTLAG~~S~~PL~~M~~A~~P~~E~~I~~I~~H~~I~~L~~SP (11) DSSE~~G~~YN~~P~~LL~~V~~D~~W~~A~~I~~GA~~V~~A~~F~~R~~L~~I~~T~~G~~D~~D~~L~~.....IS  
Bub1 ..... IYSQ~~A~~R~~Y~~Q~~S~~PI~~E~~L~~L~~P~~I~~G~~T~~P~~L~~E~~W~~L~~K~~I.....NQS~~S~~T~~T~~N~~V~~G~~W~~S~~Y~~N~~L~~D~~Y~~L~~G~~I~~C~~K~~V~~M~~F~~H~~L~~T~~C~~G~~K~~.....  
DDB0230007 ..... SI~~Y~~Y~~L~~S~~P~~E~~V~~L~~K~~.....GYT~~S~~F~~S~~S~~D~~I~~W~~S~~F~~G~~V~~L~~F~~K~~C~~I~~T~~G~~Y~~.....  
DDB0229337 ..... QFF~~F~~Q~~D~~Y~~L~~S~~S~~P~~E~~N~~Y~~K.....GSL~~V~~G~~V~~NE~~Y~~S~~M~~V~~T~~L~~G~~I~~L~~Y~~Q~~CL~~T~~G~~E~~.....  
DDB0229346 .....  
Lvsg .....  
DDB0230125 ..... TENE~~E~~F~~Y~~Q~~G~~T~~M~~N~~T~~AS~~N~~R~~I~~Y~~N~~I~~L~~I~~N~~.....NRT~~N~~H~~A~~F~~S~~V~~V~~ES~~D~~D~~L~~E~~S~~L.V~~K~~V~~Y~~I~~M~~E~~N~~E~~Q~~.....  
DDB0204911e ..... TENE~~E~~F~~Y~~Q~~G~~T~~M~~N~~T~~AS~~N~~R~~I~~Y~~N~~I~~L~~I~~K~~.....NET~~N~~H~~A~~F~~S~~V~~D~~ES~~D~~D~~L~~E~~S~~L.V~~K~~V~~Y~~I~~M~~E~~N~~E~~Q~~.....  
CK1 ..... THO~~H~~I~~P~~Y~~R~~E~~H~~KN~~L~~T~~G~~T~~A~~R~~V~~AS~~L~~N~~T~~H~~O~~.....GIE~~Q~~S~~R~~R~~D~~D~~L~~E~~S~~L~~G~~V~~L~~M~~F~~N~~R~~G~~S~~.....  
DDB0216336 ..... SGE~~V~~R~~P~~A~~R~~E~~S~~T~~G~~F~~R~~G~~T~~A~~R~~V~~A~~S~~I~~N~~S~~H~~L~~.....SKDL~~G~~R~~R~~D~~D~~L~~W~~S~~I~~F~~V~~Y~~L~~I~~E~~F~~A~~R~~G~~Q.....



Subdomain X

|            |              |                                                                                                                    |                      |
|------------|--------------|--------------------------------------------------------------------------------------------------------------------|----------------------|
| Akt1       | PPFYNO       | .....DVOEMYRKIMM.....                                                                                              |                      |
| DDB0220670 | PPFYSE       | .....DPHEMTKLILS.....                                                                                              |                      |
| DDB0216386 | TPFVGD       | .....NQNMIFEKITTNYT.....                                                                                           |                      |
| DDB0220701 | PPFNDD       | .....TPELIFOHLHRD.....                                                                                             |                      |
| DDB0220700 | PPFOED       | PNESINPKSDNDEKKNVRIIFNKITNHK.....                                                                                  |                      |
| DDB0185113 | SPFNGS       | .....SVQETFONILQ.....                                                                                              |                      |
| DDB0229452 | TPFIGE       | .....TPEEIFESILS.....                                                                                              |                      |
| NdrA       | PPFLSD       | .....NTTETCLKILNCKETL.....                                                                                         |                      |
| NdrB       | PPFCSE       | .....SIRETYHKIMNWKOTL.....                                                                                         | PK                   |
| NdrC       | NPFCAD       | .....TPNDVFINILRWKETL.....                                                                                         |                      |
| NdrD       | TPFNGD       | .....TPEEVFMNILDWKNIL.....                                                                                         |                      |
| DDB0231558 | PPFDGD       | .....SPEEVMETVLKWK.....                                                                                            |                      |
| DDB0216387 | ALFVES       | .....PDTTEQKIRENIGNWRGLL.....                                                                                      |                      |
| Pdk1A      | VPERGK       | .....TEFLTFOKVSNI.....                                                                                             |                      |
| Pdk1B      | LPRKGF       | .....NEYQTFLLITK.....                                                                                              |                      |
| PKA        | PPFYDD       | .....DTFAIYNKILLA.....                                                                                             |                      |
| pk4        | PPFVSE       | .....GSQNDIFRLIR.....                                                                                              |                      |
| DDB0185224 | LPFNSK       | .....ESLLNRKAD.....                                                                                                |                      |
| pk2        | PPFYSQ       | .....NVSTMYOKILN.....                                                                                              |                      |
| DDB0220702 | PPFEHK       | .....NRALMQEKIIS.....                                                                                              |                      |
| pk3        | SPFLAS       | .....NRNDMYKSMIQ.....                                                                                              |                      |
| Aurora     | SPFTSD       | .....EEKNIIFH.....                                                                                                 | NI                   |
| MLCK-A     | PPFYGD       | .....TVPEIFEOIME.....                                                                                              | AN                   |
| DDB0216385 | PPFYSD       | .....DESEMFELITK.....                                                                                              | GQ                   |
| DDB0216309 | PPFWDK       | .....NNAVLYEKIRN.....                                                                                              |                      |
| pXi        | PPFDET       | .....TG.....                                                                                                       | YV                   |
| DDB0216308 | APPYAD       | .....THHELFQKILD.....                                                                                              | LE                   |
| DDB0229351 | PPFOGK       | .....NNMIVMSLITIK.....                                                                                             | GEL                  |
| DDB0216307 | PPFYAS       | .....SQNLFEKILLT.....                                                                                              | AD                   |
| DDB0216312 | PPFYSE       | .....DIRKLFESILS.....                                                                                              | AS                   |
| Snf1       | LPFDEE       | .....SIPMLFKKIRE.....                                                                                              | GV                   |
| DDB0229364 | LPFDEE       | .....NIRRLLNKVKNI.....                                                                                             | GA                   |
| Lkb1       | PPFSGA       | .....NMFVLFENISK.....                                                                                              | CK                   |
| MARK-A     | LPFDDG       | .....NYVELFQKILLA.....                                                                                             | GN                   |
| MARK-B     | LPWTLT       | .....DGVOVEGMDRLLR.....                                                                                            | GE                   |
| MARK-C     | LPWEGD       | .....SQAEISFNSVH.....                                                                                              | GN                   |
| DDB0231454 | LPFINV       | .....TDMIVGKFLIP.....                                                                                              |                      |
| DDB0219986 | NNSDGNENDNN  | .....NNNNFLIREPFLLP.....                                                                                           | EE                   |
| FHAK-A     | PPFDDD       | .....DDEEMSTPQLFEKIVS.....                                                                                         | GN                   |
| FHAK-B     | KPFIVDC      | .....RDLYHSFIN.....                                                                                                | GN                   |
| FHAK-C     | PPDFDH       | .....TNNFNKLINQ.....                                                                                               | GL                   |
| FHAK-D     | PPFGDP       | .....OTKDFFEKIKN.....                                                                                              | GG                   |
| FHAK-E     | PPFDDS       | .....REVSIFFEQIRN.....                                                                                             | AK                   |
| DDB0220010 | TPFISK       | .....TNSLLDIYD.....                                                                                                | QI                   |
| Apq1       | PAYNSG       | .....SVPDLLN.....                                                                                                  | QL                   |
| tsunami    | PPFSAN       | .....SLADLVHMTLES.....                                                                                             | NI                   |
| Cdk1       | PLFSGD       | .....CEIDOLFRIIFRVLGTPDDDSIWPGVTKLPEYVSTFPNWP.....                                                                 |                      |
| Cdk5       | PLFPGS       | .....GTSDOIFRIIFKILGTPNEESWPSITELPEYKTDFFVHP.....                                                                  |                      |
| Cdk7       | PYLPGT       | .....GEIDOLRKICCSALGTPNESNWPVGTCLPNYIK.FTDHP.....                                                                  |                      |
| Cdk8       | PLFPGKEKDPKI | .....PSLFQDDOVEKIIIRVLGKPTLDMWPDIKHLPEWKRLSMEAF.....                                                               | P                    |
| CDK9       | TLEPGR       | .....NSIDOLDKIYOVCGSEPNANNWPEAMDLPFWDALKPKRE.....                                                                  | YNSLSLK              |
| Cdk10      | PLITCN       | .....NEVDQIMRIFNLLGEPNEQIWPGFSSLPNFKRLNNIHQ.....                                                                   | P                    |
| Cdk11      | VLLQGS       | .....SEIDQMDKIFKLFGTPTEKSWPAFFKLPLAKYFNLTDO.....                                                                   | P                    |
| DDB0229294 | NFLPGS       | .....SEQOQTEAICKLCTPTDEIWPNVSQLQNFNQISHLPV.....                                                                    | Y                    |
| DDB0229424 | YMFACS       | .....NDSLQLELIFKTFGTPTEKNWPGISKLSGYSPLYGSKSKKY.....                                                                | PSK                  |
| DDB0230050 | YLFAGA       | .....DETAQDILIFKLFCEPTEKSWPGVSSLPGYNDLNFNKQQQQQNE ( 38 ) YNNISTSCLOSPSSPPIGGYASSLSSDFNSNEYNGYNQTFNSNEDCLAISQK..... |                      |
| CK2        | DPEFHGH      | .....DNIIDOLVKIVKILGTEEFYAYLDKYGIVVDHTILSIGKHPK.....                                                               | KPWS                 |
| DDB0219953 | DPEFNGD      | .....NNNDOLKIVKVLGTDLDFNFDKFGLSLTDEQSSLIKP.....                                                                    | ROKSNWE              |
| ClkA       | TLEFTH       | .....NNVQHLAMMEKVMG.PFPNSMSNVSKKYFNDYGTLNRPQNSDE.....                                                              | IKSMERVEG            |
| DDB0229841 | RLFRSF       | .....NSKEHLKSTYKLI GAPKASEGAYVVKGELLFFLMEYNRKN.....                                                                | SF                   |
| DDB0229333 | OLFRCE       | .....SKQSLIIEISELIGTPTYDECKESTNGFARNFILNIPLK.....                                                                  | SR                   |
| DDB0229296 | RLFKTQ       | .....DFEDHILISISKLIENPTAEDLSIVLSKSIFOYMEKIPKST.....                                                                | LTP                  |
| Dyrk1      | PLFSGQ       | .....NEODOLTKIIEVLDLPPSHMIDSSPKAKKFFTKDPINSTYQLKKNEKLTNVEFC.....                                                   | KKKLSEIIGVETGGPQSRKN |
| Dyrk2      | PLFPGS       | .....DEPEOLACIMEVLCAPPKSVIDNSTRKDIFFEDDGTPKPVKNSTT.....                                                            | GELYTIG              |

Subdomain X

Yaka PLFPGN.....SEYNQISRIIVEMRGIIFPSDLLDKGKSSSTRYFHRHLGNSDDNNNNNNNNNGKPYYYTLKSEEDYQRD.SKTTLLPSKKYFNYKTLPEIIQNYGFKKSMSP  
 Prpf4B PLFPCK.....TNNDMIRLFMEYRCAFSKMKLKKSEFVSNHFNENLVFMKQEIDNIEKTVRKVPH.....DITKPTKDILQFLLPK  
 GSK-3 PLFPGE.....NGIDQIVETIKVLGTFPTKEQIHAM..NPYYTSFKFPEIKA.....N  
 GlkA PLFPGT.....NSNDOLGRIIEVLGSEPTKDDMEAMKPSKPYH.L.QLPNI.....N  
 Erk1 PLFOCK.....DYHQITLTIETIGSESEEDICNLANEQARQFIRNMGNO.....P  
 Erk2 AMFPGN.....STMNQDILLIEVTGRESAEDIEAIKSPFAGTMLESPP.....SN  
 DDB0229430 PMFPGS.....SEIDOLFKICTIMGSEPTSATWIDGIKLANSMGTFPPNVOP.....PS  
 Sky1 HLEKPKSG.....KGFKSDHIALMIELLCKEPRFIFAGGDESRYVFTHKGDLRKIPDLSL.....QWPLFSV  
 DDB0230051 KLNNLNLDNNNNN(52)QLYSVLENNISTYKESAPKNGNLYFKENHNI I I KSKVERDFNGANLPT.....  
 DDB0230126 PLFHGH.....NNKSVLESIVKIVGRPFQKIDIRMIANGNMTSDAIQLLOYAASL.....PVPFEDS  
 Cdc7 YPFIS.....PDDMTSIAEIVSIIG..TKKIVDIAHLLLEKKISISHSIPPTW.....RDLRRL  
 DDB0229971 PPFYDL.....NPLGAMYRIC.....  
 DDB0229896 PPFYDL.....GOMPALFRIV.....  
 DDB0229877 PFWDL.....GTMPAMFAMV.....  
 DDB0231212 PPFYGL.....APAAALYKIV.....  
 DDB0229915 PPFYTL.....QPMAMFRIV.....  
 FNIPK-A.....LFEKD.....  
 FNIPK-B LEETEI.....QIDGASFNNNNNKPK.....  
 FNIPK-C...DPK.....IT.....  
 FNIPK-D...CDCT.....KDENI.....  
 FNIPK-Ea LKLLDI.....  
 FNIPK-Eb NLCHSE.....RD.....  
 DPYK4-a.....NPKKI.....  
 ZakA-a.....DLSQK.....  
 DDB0230002 EIKPIK.....LT.....  
 DDB0229378.....LNQLCLQR.....  
 Mek1 PPFYGSNLPHQQQP(83)SVPEGMGFVWLLDCIV.....  
 MEKKalpha PFWNSI.....TELAAVMYHIA.S.....  
 DDB0229911 PPFYAEY.....PPMKVLLLTLO.....PP  
 DDB0230012 PPGYDL.....PPSKVFMNLLFGNSPS.....  
 MkcA NKLK.K.....NPIKTMFMVGSEG.....  
 MkcB PFMES.....AVKAMFTVATD.....  
 MkcC PPHR.K.....SSLTAMFTTATE.....  
 MkcD LPYHDS.....RLKAMVFVATNNL.....  
 MkcE VPHH.K.....SKIKAMFLAGTVGVK.....  
 MkcF PPHRDS.....RMKAMFYNAIN.....  
 PakA PPFYLEF.....PPLRALFLITTO.....  
 PakB PPFYMSF.....PPLRALFLITTK.....  
 PakC PPFYMDF.....PPLRALFLITTK.....  
 PakD PPFYAKY.....PPVRAFLITLLE.....  
 Pake PPNRGL.....RSMNQLVEIPNM.....  
 PakF PPHIDL.....PPMRAMKMPVNW.....  
 PakG PPLYTM.....PPTRAMLIPNK.....  
 PakH PPLSEV.....NPMRAMYMIGRR.....  
 Krs1 PPLFNV.....HPMRVIFMIPNPSR.....  
 DDB0216375 PPFYHDL.....HPMRVLFMIPTS.....  
 SvkA PPRADL.....HPMRALFLIPKD.....  
 DDB0216374 PPLFNL.....NPVKVIFVIPFR.....  
 DDB0216379 PPRFDV.....PPSRVIFTIPHQ.....  
 DDB0216377 PPFNSNV.....HPMRVIFMIPRE.....  
 DDB0216378 PPLSEI.....HPMKVLFQIPYR.....  
 DDB0230010 PPFYGKD.....SSLKALFYTAIH.....  
 DDB0229972 PPFSHL.....GPMEALIEIINPSTTI.....LP  
 DDB0229973 PPFYHQF.....QHLQSIEMIINGTC.....PP  
 IfkA-a PPLQYQL.....QQQYDLIKEIEQ.....  
 SAMK-A ESYSKK.....ENNQPNLQKLP.....  
 SAMK-B PFWGGK.....RNHQSHSPPIPT.....  
 SAMK-C...YII.....TTPIIILPSIPS.....  
 SAMK-D TDFKED.....EGFEELKRTFAGVLT.....  
 DDB0230038...RD.....IKLSDLKSNTVNGYT.....HYLRP  
 DDB0230124 PPLFODI.....HVSRIITDITL.....NGVRP  
 DDB0229871b KPFYHEV.....TLDFDFQIIHKTSK.....LNLRP  
 DDB0229850 HPPFSEF.....KDIKNDFOQLL.SSK.....NGLRP  
 ARCK-1 PPFYQEY.....NKMFNFAFQVALL.....VNSSKRVLRP

Subdomain X

|             |         |                     |           |
|-------------|---------|---------------------|-----------|
| SAPKalpha   | RPFSEY  | KNLQHDFOIIITQAK     | KNLRP     |
| DDB0229849  | RPFSEY  | SHIKMDFQIML         | NSKEGLRP  |
| DDB0229848  | LPYAEY  | PHLKFDYQILI         | SSAKKDVRP |
| Phq2        | RPFHEH  | PISMDIOIILTSK       | NKVRP     |
| DDB0229847  | KPFSEF  | KHIQYDFQILVQTSK     | FNLRP     |
| SplA        | EPQODM  | KPMKMAHLAAY         | ESYRP     |
| DPYK4-b     | YASPN   | TIYSPKEMASMSD       | EKLNYP    |
| DDB0229872  | DPYNGM  | EPLRLAFLASV         | EDYRL     |
| DDB0229844  | RPYEDN  | TEISFDFQIVIMSSK     | QGI RP    |
| ZakA-b      | APNTI   | YSPKEMASMSD         | PKONYRP   |
| 7TMK1       | QPNQNL  | QPLKMAHLAAY         | ENYRP     |
| rk1         | DPYFGI  | PPFQVIFAVGR         | EGMRP     |
| rk2         | DPYFGI  | PPFQVIFAVGR         | EGMRP     |
| rk3         | DPYQGM  | PTFQIVISVGQ         | HKLRP     |
| DDB0214883  | IPYAGK  | NTMQVRSIDR          | GERL      |
| Shk1        | ELFPEF  | DNFFKFVAAICEK       | QLRP      |
| Shk2        | EPYMKL  | YSSYPQLVEGVNK       | KNRP      |
| Shk3        | EPFSSH  | RELEKFREAVCVK       | HERP      |
| Shk4        | APYSHH  | KDYDIFFNAICNE       | KERP      |
| Shk5        | ELFPEY  | SEIDPPYDAICNK       | KLRP      |
| DDB0229963  | EPYQGI  | PPMNAGILVASK        | GLRP      |
| DDB0231199  | EPFLEI  | QSIVELARSVCDK       | KLKP      |
| DDB0229940  | EPYENI  | NSWSIPVLVAK         | GERP      |
| DDB0218878e | EPYENI  | NSWSIPVMVAK         | GDRP      |
| Rck1        | SAYDEN  | ANINIPNMVMK         | GERP      |
| DDB0231197  | TPYKNL  | TRIEQALFVQS         | GGRP      |
| DPYK2       | IPFSDL  | DGSQASQVAYA         | GLRP      |
| DPYK3-b     | IPFEGL  | DGTASAAKAFAE        | NYRP      |
| Gdt1        | ILVGD   | RK                  | FQGEKP    |
| Gdt2        | IPYSE   | PHWRIRELVLK         | NERP      |
| Gdt4        | VPFREI  | PKREIPRFVRL         | GTRP      |
| Gdt6        | TPENLS  | NLILE               | GERP      |
| Gdt8        | IPFHEI  | CYNDIPNRVQD         | GFRP      |
| Gdt9        | VPFSEI  | DEKWEIPSKVIS        | GWRP      |
| KinX        | APYMRD  | ASFGLAEDIVR         | NO        |
| KinY        | VLERGP  | QSAFEIDQDSA         | RO        |
| DDB0229853  | RVVKTO  | LKRTPMNAFDMNLEKA    | EH        |
| DDB0229863  | ERFPQH  | RFQFDAPAF           | LK        |
| DDB0229866  | SLKYGL  | DVDVL               | LE        |
| DDB0229851  | NLTPRI  | RNEDLGVDQKFF        | LS        |
| DDB0229865  | SKLDER  | LPQNNFDIDY          | EELQ      |
| GefX        | RKPGV   | DLWVRSPTCFDINP      | EELKO     |
| DDB0229867  | LKRPGKD | YWVRSQNGFDINIEELN   | VNI       |
| HH498       | VPFHDY  | EQIAASFKIAN         | AERP      |
| GbpC        | HPFDEF  | QFGQWMSKLEDEIIR     | GLRP      |
| Pats1       | DYFGEI  | GFMTLIEEKVIN        | GERP      |
| QkqA        | IPFDEY  | SFGKMQFINLIR        | EENLRP    |
| Roco4       | GPFDEY  | SYGKIKFINMIR        | EEGLRP    |
| Roco5       | LPFDEY  | PVAHSSFMYLEDEI.T    | NGLRP     |
| Roco6       | HPYREF  | NYS.MVSLQEDAIAK     | NGLRP     |
| Roco7       | LPFEEY  | VDQLKWSIIEDKIMK     | GLRP      |
| Roco8       | LPFDEF  | DFKFMSTLEDNLS       | GLRP      |
| Roco9       | RFFSNI  | TFMSEVEGLIT         | EGVRP     |
| Roco10      | IAFQDH  | DRFSNIVI            | SGORP     |
| Roco11      | CPFDEF  | TSFGKMEFIRKIRE      | EDLRP     |
| DPYK3-a     | LPFRKF  | NDISVAAKVAY         | ENLRP     |
| DDB0229956  | IPYKDF  | AQIQWISMVLE         | DSFRP     |
| DDB0229957  | LPYSHI  | AFNCEVEDQVL         | KGLRP     |
| DDB0220138  | IPFDGM  | DPYEKELLK           | SGKRL     |
| DDB0220436  | LPYESL  | SREQVKQIKT          | DMERES    |
| DDB0230133  | RPYOEY  | DQLGYLELARVRE       | EGLPP     |
| DDB0229871a | QPSGNI  | SATSLG              | HP        |
| DDB0229955  | LPYSGL  | DSVQLALAVT          | TKSLRP    |
| Bud32       | FISTHP  | NSEQLFQTILS.NYELTS  |           |
| DDB0231196  | IPLFONE | VDFLIWIHKDYRFSFPVGT |           |

Subdomain X

DDB0229339 IALFONE.....VDFSIWTHKDYRFSFPIGTP.....  
 DDB0231195 HPYHEYQI.....ADEPENLNIQNTGLIPTIPPNLP.....  
 DDB0229335 NPFYEF.....KISKMEYFKTVVALENFLVPIVPTFLP.....  
 DDB0216331 LPLTKRS.....FGQELIEGKFDRAKAFKQEFDDSD.....  
 DDB0229344 LLSHNR.....IYLGEDMLNDRFDSMQFLSTFPEKY.....  
 DDB0231281a TGFVYN.....RIYLKLFEMTNPFFETR.....  
 DDB0230037a .....RVOQNOY.....  
 DDB0219988a ..LVHSP.....MNSIFESLFQLCTLENFKIR.....  
 DDB0231281b ..FNSS.....  
 DDB0230037b .....FNITS.....  
 DDB0219988b ..FNCNP.....  
 DDB0231182 SPSSSS.....TTSTSTSOVLIKSDSDSSSSASSSSSSSSSSSSSSSSSSLP.....KSKNK  
 IksA LPYRYSGDPF.....IDEDPNRNLPSLIDEIAGFSNNRILFPQIPQRS.....  
 IreA HPFGHRY.....NREKNVLKGGKFDIDQIKHL.....  
 IrlA HPFGNN.....KLLRVANIVYDKPDLEPLKFN.....  
 IrlB HPFGND.....KLFRIVNIISNKMNLTPLSN.....  
 IrlC HPFG.D.....KFYRIVNILTDPKPILEPLKHN.....  
 IrlD HPFG.D.....KFFRMANILTDPKPILEPLKHN.....  
 IrlE HPFG.D.....KFSRLRYITKSKYNLSQLSNLN.....  
 IrlF HPFGND.....KLFRIYNIMLNKNVNLELLGHN.....  
 DDB0216373 SPFEVC.....DNEPNGSVALKVLGS.....L  
 DDB0229347 DPFDGG.....SLOIINN.....  
 DDB0229350 TPFEDS.....GSLGILNS.....  
 Nek2 PPFEEAT.....NQAOLTSKIQV.....  
 Nek3 HAFNAA.....NLPALVLKILK.....  
 Nek4 HAFDAK.....EMPSLIFQILQ.....  
 DDB0229345 LPFDGR.....KETVMRNIQTESTIFKPVNHPN.....  
 Ifka-b ..FQTO.....MERSNILRDLRDNLKFPFPGFESTK.....  
 IfkB ..FQTO.....MERSNILRDLRDNLKFPFPGFESTK.....  
 DDB0216407 ..VFSTG.....HERVIVLRNLREKFEFSPDFERNH.....  
 DDB0229432 ..GFETQ.....FERTTHIKNLKNGIL.PSWFTSKH.....  
 DDB0220611e ..PISTR.....MEKARVLTDLRNGVL.PKSFLQKY.....  
 DDB0220652 TTMERS.....TTL SKLKKSLSVLKTN...PNLKQKY.....  
 PLK PPFETS.....DVKHTYQRIKQNOYSFPDEPIIS.....  
 Vps15 PPIFDG.....SOLLSYRKGEYSPEPIIRQRIQD.....  
 TBCK CIWQDN.....NPSIVTNRILHLSGYSTTOSFNSISKSFEQCELKTTIINEKQHEEYEEYDDEDEDISEEEKEKRIKDIKLNRRDNMNNFINSLKREEKENS DSN SSGS  
 TtkA PPFK.....SFSNIIISKYQAIINPHHKIEFPVHPN.....  
 DDB0220004 PLPKSGM.....EWD SIRNGILSFEKEDS...IYDDNKNDFS.....  
 DDB0229384 PLWEQL.....RSDKAIDFLEPGK.....YS.....  
 DDB0216398 NLPQKGO.....WWRNLREGKIPFPENDDSIS.....  
 Scy1 MTKAED.....IKNLDQIPQLHQAYQKS.....  
 Scy2 LPKLGVISYYNT.....MIEQVRRQSTMNTQRSDSA.....  
 SLOB1 VICF.....GHCLFEMIIIGIPLGDHSNINSFIPLFP.....  
 SLOB2 .....YEMENPHSVDISIPAHCY.....  
 DDB0229334 ..SLNN.....IPDDL.....  
 DDB0231326 FLFYDDD.....WVKFFIRVTOPGOELITPERKSKVANI.....  
 DDB0231559 PPFGLD.....KYL R VASAVSNYLRPILHPVIP.....  
 DhkG-a LPFQSS.....DLSELIHSHLAKKPPVLIDLNQNVP.....  
 DDB0231198 YOYKHP.....TPLHRDFLTTDFQYIP.....  
 DDB0231179 HPGTTLFEQN.....VLFLLKPHGIEIVPTGGPNNNYTTLKVAFSNDIRNFT.....SN  
 DDB0231335 DTINHDKKEKIKNV(66)NLNSNQKILIDLNLIEDEEILIP.....  
 7TMK2 YSCFDSKFDTSN.....YD DDKFNKSNKTIKKPDLDPYIKKDEKLW.....  
 DDB0229381 VIFPNL.....NQTTVLAALVNLA KMIDNGDFQKGLDSIPNE.IR.....  
 Bub1 .....ELKLSLSQ.....  
 DDB0230007 YPFYSN.....DATKLIESIYDNYLDPIIRLPSDNNDLIQ.....  
 DDB0229337 LPEPTY.....PKIVNFTSSSQNVEIPP.....  
 DDB0229346 .....  
 LvsG .....  
 DDB0230125 AVKRTI.....KSIPNSEIGLFRTMWEFFNTECFPOYSTL.....  
 DDB0204911e TVKRNI.....LSIPNSEFGLFRTMWEILKTEFYPOYSTL.....  
 CK1 LPWQGL.....KAYTKRDKYEKICDKKAQTKIDTLCQ.....  
 DDB0216336 LPWRKL.....KDKDQIGEMKQKYNTPD.....LVKDLP.....

Subdomain XI

Akt1 ..EKLSPPHFTSPDARSLLEQLERDPEKRLA.....DPNLIKRHPPF  
 DDB0220670 ..SPLKFPPTSKNAASLVSLNDRDPSKRLGSG..ESDVEIKAHPPF  
 DDB0216386 ..NEINFPSTYSEVAIDLIOQLLOVDPLKRLGA...NGAEVVKRHPPF  
 DDB0220701 ..REMEWPEETSEAKDLILKLLNPDYKRLGA...NGAYEVKTHPPF  
 DDB0220700 ..KKLYFPKLYPVAIDLIEKLLDPNPSVRLGA...NGVDEVKCHPPF  
 DDB0185113 ..RNISWPEDEMSPEARDLIDKLLALDPRORLGF...NGAEIKSHPPF  
 DDB0229452 ..RN.TECIEIOKDAKDLIKLLDPNPSTRIG.....SKDIKNHPYF  
 NdrA ...QIPTDMGLSKEVIDLIKRLVCEKDRIK.S.....ADEIKLHPFF  
 NdrB IMEEAKAEVNLSPFAODLIERFIT.DPMTRIGF...NGVEIQSHPPF  
 NdrC ..DWLFTQELVEAADLLKNM.M.EOPHRLGG...KGGKODFKNHPPF  
 NdrD ..DWDLYSDYSEYAVDLLQKLLC.EPDKRIG.....IDEMKVHPYF  
 DDB0231558 ..TMLQRPDGVSDLEWDLISGLLN.DGSTRIGSG..EKGVENIKNHIFP  
 DDB0216387 ..NTAVQKNQPMKQAESLIRECTAPE.RKRPD.....ASTIKKHPPF  
 Pdk1A ..RELVPINMNPVIKDLVEKLLVIKPTDRICSSSTPGCFDNLKHPFF  
 Pdk1B ..REFSYPDNFDKCCMNLIDQLLDLDPYKRPT.....ISEIKNHEFF  
 PKA ..GRITFPLGFDVDAKDLIKRLTADRTRRRLGAL..KDGALDVKNHRWF  
 pk4 ..EARIQVPEVDOVARDLIEKLVVTDVEKRLGSL..EGGIEDIKNHPPF  
 DDB0185224 ..FQLIFQNSYLSDIEIKDFIFQLISVDPSKRLGT...FDSCSIRNHKWF  
 pk2 ..GELKIPTYISPEAKSLEGLLTREVDKRLGT...KGGGEVQOHPWF  
 DDB0220702 ..EKAKFPKFSVSSARSILINGLLTKDPTKRLGA...NGAIEIKRHPPF  
 pk3 ..GNLRMPMFLSSDAODLIEKLLVDPDNKRLGST...OGFBEISSHPFF  
 Aurora QENDVYYPSSISPEAKDLISRLVSDPHORIT.....LKDVINHPWI  
 MLCK-A YEFPEEYWGGSKEAKDFIGKLLVVDVSKRLN.....ATNALNHPWL  
 DDB0216385 WEFPKSTQHKYSDQVKDLIKLLLENDPNKRLT.....VKQSLIAHKWI  
 DDB0216309 VDYGWPEGLEVSNEAKDLVSHLEKNPEKRFIT.....FEQCLIHPPWV  
 pXi LEFFSPEWDNISDSAKSLIKGLLNNDPSKRFIT.....IDQTLKHPWI  
 DDB0216308 YDFPEPEWNGITDLAKDFISOLLINPEERWT.....ASQCIKHPWL  
 DDB0229351 NFDSSVGVWNVSESAKDLIRKMLNPDPEKRLT.....AQQVLLHEWI  
 DDB0216307 YDFPEPEWTHVSEHAKAFIRNLIKVDPDORHT.....AKQCLDDLWL  
 DDB0216312 YDFPNDYWGNVSKBAKHFINCLITVEPTKRYIS.....AKQALEHPWI  
 Snf1 FSTP.DF...VSPSCADLIKMLVVDVVKRIT.....IHEIRNHPWF  
 DDB0229364 FSMF.PY...THKDAODLLTKMLTVDPKRLT.....IKEIKHPWF  
 Lkb1 IEEF.ND...LDKDLVNLIKGLLOVDHIOQRF.....LGOIKNHPWC  
 MARK-A YTFP.SY...LTHECKSLISRMLVVDVDPKRAF.....MEEILNHPWL  
 MARK-B FKYP.SHV.IISDDVKDLINRMIVAEPEVERAT.....LDEIKTHVWV  
 MARK-C YEDP.TH...LSAAVHILRRMIVPNPKDRAT.....IOELKNHPWT  
 DDB0231454 PSTP.....LDLQDLIKMLTVDREHRLN.....IMNVLNHPWL  
 DDB0219986 NNLELIPANH.SDORLISLSSIFORNPKLRPT.....AHQIIVHPYF  
 FHAk-A YRVEKLEKSLISSAADLVKGLLTVDDPKRLT.....VEQALNHPWI  
 FHAk-B LGFTSKKWAKISNYAKDLVRRLLVIDPEHRT.....IKEALNHPWF  
 FHAk-C YNFSLPVWDVVTEAKDLIKLLNVDPTKRLT.....TKGALSHDWF  
 FHAk-D FSPSPYWDEISDEAKSLIKNLIKVDVEKRFIT.....IDQALNHPWF  
 FHAk-E FEFDPEDWSSVSEAKDLIKRLICVDPHKRYIT.....CNNLIQHPWF  
 DDB0220010 VNHEPTYPREISNDLMDLFRLLDKNPLTRIQ.....IAEIKSHKWT  
 Apq1 QNKKIKLPSHISSDCONLTYSLLOIDVEKRIS.....WEDFFNHKWL  
 tsunami EIPKELNKY...PDLVSLFROLICKNEDKRIG.....WPDLLYHPFV  
 Cdk1 GOPYNKIFPRCEPLALDLIAKMLQYEPSKRLS.....AKREALHPYF  
 Cdk5 AHQLSSIVHGLDEKGLNLSKMLQYDPNORIT.....AAAALKHPYF  
 Cdk7 ATPFKQLFTAASDEAIDLISKMLQFNPSNRIS.....AADALNHPYF  
 Cdk8 NSLAKCVGIDENSQAYDLISKMLLYDPSKRLT.....ASEALDHPYF  
 CDK9 DFYQHENPSFFTKEAFDLDKLLCMDPKKRLT.....ASEALDHOYF  
 Cdk10 YNNLRELVPITSDTAFDLDLNLQTYDPTKRLT.....ASDALKHPYF  
 Cdk11 YNNLKSFKPHITDNAFDLILNKLLLELNPEARIS.....ASDALKHPYF  
 DDB0229294 PSRLRTVFKNFSNDFIELLEGLLTLNPKKRLT.....AEQALQSPFF  
 DDB0229424 SLKDISKFKFSNSTLDIILRMLTLCPKNRIS.....TKREALNHPWF  
 DDB0230050 KLIDKFPHLVLLPSVLDLASKMLTLDPKRLIN.....SLEALHPWF  
 CK2 RFITKENQHIAVPEAIDFLEKLLRYDPAERIT.....TREAMEHPPYF  
 DDB0219953 RFIPIYENDDIAQPDADIDFLDKLLRYDPTERT.....AKEAMKHPYF  
 ClkA LKQLKEYFHPCHDSFFDLASRLLEYQPSKRLS.....ASDALSHPFL  
 DDB0229841 QPTFNNTFIGCNOIQIDLLKNMLCWDPRDRYS.....VNEILHSPYF  
 DDB0229333 HGGIKKRIPNATEEEIEIELEGMICWNPKKRWV.....IERIIQHPYF  
 DDB0229296 SVGIKRRFKGASKDQIELLOGMICWDPRKRLT.....IDQLAHKYF  
 Dyrk1 EPGHALVDY...LKFLDLIEKMLIYDPOKRLT.....PLEALQHSF1  
 Dyrk2 TKSFKDSIRSGDEDFDNFILDCLKWEPSORIT.....AEQGLKHDWI

Subdomain XI

|             |                                                   |
|-------------|---------------------------------------------------|
| YakA        | QDIEKEKQHR..IVFTDFINGLQLDPNERWS.....PMOAKEHPFI    |
| Prpf4B      | NVSIPDQDMKKLIQLKDLIEKCTILDPEKRTT.....PFETLNHEFL   |
| GSK-3       | PWPRVFKAKDVPAESIDLISKILLYDPSSRLK.....PVEITCAHPFF  |
| GlkA        | PKFFESLHNVEDKTVVDDLKSTIFIDPVKRAS.....IDETIAHPFL   |
| Erk1        | KVNFANMFPKANPDAILLERMIFYDPSKRLT.....VEEALAHPPYF   |
| Erk2        | PRSLSDMYPASVDALDILKLLQFNPDKRTT.....AEALAHHPFV     |
| DDB0229430  | INPLSTLLPNANQDAIELITDILLOYDPLKRPET.....PLOALQHRFY |
| Sky1        | LTEKYKFLSQEAKDFEAFLLPMLNYLPEKRAT.....AKDCLNHTWL   |
| DDB0230051  | .....DAYNLICALLSFNPTTRTK.....ANQAAFHKFF           |
| DDB0230126  | IDNLRSHCSLASDSDLTOMLQFVPHKRIS.....IEQALSHPFI      |
| Cdc7        | RSESSCDKQDVPVELYDLLERCIDPNPLTRIT.....ASEALHHPFL   |
| DDB0229971  | QDDRPPPLPDDISSELANFLERCFCKSTEERAT.....AKELLSHPWI  |
| DDB0229896  | QDDCPPLPEGISPLPKDWLMOCFOKDPENLRIS.....AQKLLKHKWI  |
| DDB0229877  | NNPHPPPNNISADLKHFLACFVRDINKRPET.....ASOLLEHPWI    |
| DDB0231212  | QEDHPPIPPGISAALKDFLLNCFKKDENIRSS.....AKOLLHHPWV   |
| DDB0229915  | SDQHPPFPPTDISKEFLDYFOQSFKKDPTORPT.....AQEQLLOHPIF |
| FNIPK-A     | IHGKPKIPDHLASACKNFIOQCTIDPNHRDD.....IINLISHNFI    |
| FNIPK-B     | NIWPKIPPHASKFLQNFIOQCFEVEVLRFD.....STITLIDHPFL    |
| FNIPK-C     | TNFEPITPYHLNCKNFIOQCTIQDPEYHRWD.....TNLILLTHKEFI  |
| FNIPK-D     | DFLFSKIPNHLVEKFKKVISQLSKNINNOIL.....TDIISNKITT    |
| FNIPK-Ea    | .NGIPLIPDHLNLFKNTIOHCTQINPNARFN.....ANETLYNYVIK   |
| FNIPK-Eb    | DKGIPSIPHTLSNSEKNIIQNCIKFDTNARHS.....VESTLITLSN   |
| DPYK4-a     | FDGPIIIPNHVSEIMVDFIKRCLIIDPNKRSH.....MEBLLTHRLI   |
| ZakA-a      | LNGIPIIPDHLSDTLKDFLNHCLVIDPKKRSY.....MEBLLSHKLI   |
| DDB0230002  | HIYEVVEKSQISPLFLNFIKKCT...GRYLD.....IDVLEIHPFL    |
| DDB0229378  | PNNIPVFPVN.SLFTTEILNLCFOTEPSKRIK.....SHOLLKHPFF   |
| Mek1        | KEEVPILPSTFSKEFRSFISECTOKEPTERTPT.....ASNLLNHEFV  |
| MEKKalpha   | SNSIPNIPSHMSQEAFFDLNLCFKRDPKERPD.....ANOLLKHPFI   |
| DDB0229911  | PSLEGDGESKWSHSEKDLVEKCTOKDPSKRPL.....PSKLLHHRFF   |
| DDB0230012  | .LQEEEDKGVCSHLYKDLVDKCLQKEPSKRPN.....ASKLLEHKVF   |
| MkcA        | IKDPFEDPHKWSDEFFHDIINKCLQMDPHKRPS.....AQEILLKHPFI |
| MkcB        | GATGFDDPALWSDCFKDFLSLCLKODPAERAT.....AEBLLKHPFI   |
| MkcC        | GCAGLDKPERWTEHFTHFLNLCLEMDPKRSRT.....AEOLLKHPWI   |
| MkcD        | NLPLLLSTTTSLSEERDFLTNCLQFDPKRLT.....SSOLLQHPFL    |
| MkcE        | FSKEKKYSCHWSPFLDFLNVCLQMDPTKRPET.....PTOLLQHPFI   |
| MkcF        | GI..DFPKIRCIDLKDWLWOCFESNPEKRSRT.....VDKLMRHPFF   |
| PakA        | GLPPIRDAAKWSKEFNDFLALCTEKDTEKRAS.....SSSLLHHPFL   |
| PakB        | GIPDLKDONKWSDDFKDFVVKCLDKDVENRPE.....AKVLLNHPFL   |
| PakC        | GIPPLKETTKWSKTFODFFSKCLDINVANRPD.....ATDLLKHPFM   |
| PakD        | GVPDFKEPNKWSSEDFIEFVNLCLNLDKRRPD.....AHYLLRHHPFL  |
| PakE        | PPPKLSNPKDWSPCFNFLATCLVKDPVORPS.....VIDLLSHDFI    |
| PakF        | PPPTFAEPKWSPLLNDFLARCLVKDPEKRAS.....PIDLLCHPFL    |
| PakG        | PPPTLSKPHHFSKELNDFIGOCCKDPEKRPS.....AIELLTHPFL    |
| PakH        | PPPTFKDPKWSPEFVSVVDKCLTKDINERWS.....PSOLLDHPFI    |
| Krs1        | PPPKLTEPEKWSPEFNDFLAKCLTRKPELRPS.....AEBLLKHPFI   |
| DDB0216375  | TSPTLKEPHKWSPEFSDFLALCLAKEQSORPS.....AKDLLKHSFF   |
| Svka        | PPPTLE..GNFSKGFKEFCALCLNKDPNORPT.....AKDLLKHKFI   |
| DDB0216374  | QAPTLEVPGNWSPFNDFISVCLNKEADKRPS.....AVDLLNHPFI    |
| DDB0216379  | PPPSLKIPSDWSPFNDFVVKCLSMNPALRPS.....AQOLLSHPFI    |
| DDB0216377  | ESPALTKSISWSDKFODFISKCLTKDPAERPET.....AKELLNHEFI  |
| DDB0216378  | DPPKLNQENYSKDFINFIQSCLQKDPNQRKT.....ATELLKHPFV    |
| DDB0230010  | .QYKLPNPKKYTKEEVDFLYLCLNPDPPFKRPET.....PEMLLHHTFL |
| DDB0229972  | NCLDENEOSLFSLELNQFLLELCKKEPSDRAS.....VHDLRHHPWL   |
| DDB0229973  | LPTDLIQPKLL.OPLIELLVTCILDLPNHRPN.....ASOLLVOKLTK  |
| IfkA-a      | ...KTHPSSPISNNAKDFLSLCFTINGNGSTNDS..LEAGILLKHPFL  |
| SAMK-A      | .....DNLTISCRALGDIIGLEQNFKEP.....SKDILOKLSWF      |
| SAMK-B      | .....YLTLECKEVLNETIKYNONFRAD.....SKOLLFAQWF       |
| SAMK-C      | .....GMSLEQCILFNETTKIDSCFRPT.....SKOLLNFSWF       |
| SAMK-D      | .....SRDKVSDFYRSLFTEINKDEPCFRPS.....SKBLLKSWFW    |
| DDB0230038  | PLP.NCP.....FTIEKLIKLCSTDPVSRPT.....FTTILKILRO    |
| DDB0230124  | ETPDNVP.....SVFSRLIKACWSADSSARPS.....FLTISKILSQ   |
| DDB0229871b | TISNNMP.....NEISKILQGWFSDSVLRPS.....LDTLIKELLI    |
| DDB0229850  | SIPNICP.....EPLKLYKQCVDSQPLNRPS.....CEEVVISLNO    |
| ARCK-1      | TIPIGVP.....QVLKDLTYCLWDHVDVSSRPT.....ATEAMTALAV  |

Subdomain XI

|             |           |             |               |              |
|-------------|-----------|-------------|---------------|--------------|
| SAPKalpha   | TIPNACP   | ESLVSLLIQD  | CWDPNLENRPT   | CTDTLSRLVT   |
| DDB0229849  | TIPQNTIP  | PGLEALYKOC  | VNQEOTLRPS    | CEFTIETLNR   |
| DDB0229848  | TIPENAP   | ESLKNLITART | LVKDSLRLPT    | TLEFYEELLK   |
| Phq2        | KIPSENC   | EQLKTLITR   | CWDPNPKRPN    | CDEITLEILLT  |
| DDB0229847  | TIPQNC    | EAFSNLISN   | CWESSPDNRPS   | CEFTLDSLLD   |
| SplA        | PITPLTTS  | SKWKEILT    | CWDSNPDSRPT   | FKQILVHLKE   |
| DPYK4-b     | OIPFNVP   | LKFKEKIT    | CWDRNPLNRPK   | DFSEITDKLKD  |
| DDB0229872  | PLNGFP    | PYWVELISK   | CWNITPSLRPS   | FKETLQILNQ   |
| DDB0229844  | TIPFNVP   | PKLSYLIQK   | CWNQDPNERPS   | COQILLAIT    |
| ZakA-b      | OIPFNVP   | LKFKEKIT    | CWDRNPLNRPK   | DFSEITIEKLKE |
| 7TMK1       | PMPQMDPMW | ENLGKLIEM   | CWKKSPERPS    | FSFTLDFLEA   |
| rk1         | PVPONGP   | PKYIQLLID   | CLNENPSHRPT   | MEQCLERLES   |
| rk2         | PTPKYGP   | PKYIQLLKD   | CLNENPSORPT   | MEQCLEILES   |
| rk3         | IIVPQVS   | APFTRLITE   | CWSEDPQORPS   | FOETIVKRLEA  |
| DDB0214883  | PMPAWCP   | PKYAALMNR   | CWETDPTHSPS   | FPEITLPIMEG  |
| Shk1        | STPDDCP   | KSLKELIQK   | CWDPNPEVRPS   | FEGIVSELEE   |
| Shk2        | TIPDYFP   | TRLKDLLAR   | CWDHYPSSRPS   | FAGITSKORIL  |
| Shk3        | PITPNDCL  | DSLRRLLTEK  | CWDKEPISRPS   | FKETLSALDH   |
| Shk4        | PITADTL   | PSLRHLIQT   | CWDHNPQNRPS   | FSEITLFRLE   |
| Shk5        | PITDSFP   | KSLKTLIQK   | CWDHDPNKRPS   | FNEVTQORMNE  |
| DDB0229963  | ELPDNCD   | PNWKKLVVW   | CWSEDPNKRPS   | FEEITNYLTK   |
| DDB0231199  | KISSSVP   | NFISSLIKD   | CLHNSPKKRPT   | MNOITQKLCN   |
| DDB0229940  | TIPADCP   | SEYSKLKKA   | CWTDKPKKRPS   | FKETCDTLKK   |
| DDB0218878e | TIPADCP   | SEYSKLKKA   | CWTDKPKKRPS   | FKETCDTLKK   |
| Rck1        | ELPKDMO   | TSISNIIKK   | CWQOKPSNRPS   | FIKIVAYLES   |
| DDB0231197  | TIPPTVP   | TTIANLIES   | CWVQTPHLRPT   | FTEITLVFYF   |
| DPYK2       | PITPEYCD  | PELKLILT    | CWEADPNDRPT   | FTYIVNKIKE   |
| DPYK3-b     | AIPDPC    | VSLRKLITK   | CWASDPORPS    | FTEITLTELET  |
| Gdt1        | SLGLDKI   | PNIKNFHKK   | CWNPIDGFT     | FNEITLTKLKD  |
| Gdt2        | SLDQEIFKD | TDISDIVTR   | CWSKNPSORPT   | FDYLSKYLKH   |
| Gdt4        | RLDQDVFAD | NDISLILLA   | CWNPNPRGRPT   | FDTLIDLLEK   |
| Gdt6        | TLDLEKL   | ADIRNITER   | CWNONKRST     | FSEITISILKE  |
| Gdt8        | TADLDTI   | DDIRKIIEC   | CWIKESKRPS    | FSEITSLHLEI  |
| Gdt9        | TKGLNSL   | RDIKNLINIC  | CWPHSLPS      | FDEITVFSLVK  |
| KinX        | LITPDC    | ESLIDLTFN   | CWSDPNNRPS    | FKETISQTLKQ  |
| KinY        | LITPDDIP  | VLYSDLALD   | CIKYQPEERN    | FSHILHVLKQ   |
| DDB0229853  | LAPESCP   | RAFMDLAKW   | CCSYNPKDRPT   | FKIVVEGLKV   |
| DDB0229863  | KVPEKCP   | PDFSKLCVD   | CTKYNPKERPS   | FIKVLDTIQN   |
| DDB0229866  | LVPKDCP   | PPFLKLVLD   | CTEYDPPDRPT   | FKETITERIKS  |
| DDB0229851  | KVPADCP   | KELLRLVSE   | CKVAPSGRPS    | ASNITLGLLEY  |
| DDB0229865  | KITPSECP  | REFLELSMK   | CWNYDPNDRPS   | FDTIVQTLDD   |
| GefX        | KSLPGCP   | SELISVCVE   | CCLYEPLTRPK   | FDEITLSQLKV  |
| DDB0229867  | PSINDCP   | IOFYDLALK   | CCSYKHTNRPM   | FSTIVTILES   |
| HH498       | PITPOTID  | HRWSNLIQI   | CWQONPNNRPS   | FDOITLTIQON  |
| GbpC        | TIPPTCP   | PEYVELIQS   | CWTHEPNSRPT   | FSTIVEITLGO  |
| Pats1       | KITPDC    | EMYSKLIVE   | CWOTDASORPK   | FSEITEDRLIK  |
| QkqA        | TIPFDCD   | PRLSNLIQL   | CWSTNPKKRPS   | FTEITIKELLE  |
| Roco4       | TIPEDCP   | PRLRNVIEL   | CWSGDPKKRPH   | FSYIVKELSE   |
| Roco5       | TIPONSVC  | PDFITLITD   | CWQNDPLKRPT   | FIDITHSRLLI  |
| Roco6       | TIPSPYQTV | TGHEYCGLI   | QDCWSDIDRRPT  | FNKIVKRIKQ   |
| Roco7       | TIPNECP   | PDMKQLITD   | CWSGDPKKRPS   | FNSILERLST   |
| Roco8       | SINONCN   | RMYSLLITK   | CWNADPNLRPS   | FNSITLKTLE   |
| Roco9       | SITSHNL   | PEYDSLNI    | CWAQDPTCRPS   | FTEITTKKLEE  |
| Roco10      | SITPLDCL  | PSFADLIKD   | CWSGEPLNRPS   | PSKITLSQLYT  |
| Roco11      | TIPSDCP   | PTISNLIEL   | CWSGDPKKRPH   | FSYIVKELTN   |
| DPYK3-a     | KITPSCP   | LIIRKLIINR  | CWAPLPSDRPT   | FNDITLKLFDH  |
| DDB0229956  | PITPDSCL  | PEFRDLITM   | CWTSNPDDRPS   | FOQITITYLEN  |
| DDB0229957  | PITPMHCN  | KNYTDLMEO   | CWDDDPENRPT   | FDTIHSISK    |
| DDB0220138  | EITPENCN  | EVLKNIITQD  | CWNOQSEDPRPT  | FLSITYHRLN   |
| DDB0220436  | HITPLDHL  | KGIDLIRL    | CWKHDESI RPS  | FIEITRSRLSE  |
| DDB0230133  | MITPEIE   | GDLRKIIIEA  | CFHRDHTKRPN   | FENITEQFLDA  |
| DDB0229871a | EITPNSCP  | QSFSDLIKE   | CWNRNPDORPN   | FSQITLLKLL   |
| DDB0229955  | PITPNAWP  | YQLSHLIQA   | CWHDPLKRPS    | FTEITLNLLE   |
| Bud32       |           | SNSKIVITQ   | KLNOVRLRGRKK  | TCFG         |
| DDB0231196  |           | QSFVKLIT    | TRMCLPFRDRRPT | VROVITDNVKA  |

Subdomain XI

DDB0229339 ..... QSLVKLITSMCLPCRDRRPT ..... VHQITDEVGI  
DDB0231195 ..... SRLKRLLFLMMSKMPERRPS ..... IKECTIEEIQK  
DDB0229335 ..... DSFKEFLFSTMNRIYTCRPN ..... SEECVERLIT  
DDB0216331 ..... EPIADLILDLMLNLDQNLRP ..... IDLILONKLF  
DDB0229344 ..... EKLAFLVLSMISKNPTFRPS ..... IESTIETLQK  
DDB0231281a ..... PNVNQLIEFMRHHENLKYT ..... LLVSDFOH  
DDB0230037a ..... NKINKILFEMMCSNESTERPT ..... VDQLIEFMVC  
DDB0219988a ..... PSIDQLIEFVCRQYDQSRVT ..... ISLSSYTHPN  
DDB0231281b ..... SSKLKEIVKMGFFNYDDRIS ..... LKELIECLNK  
DDB0230037b ..... TYLNDFIDNM ..... T ..... OPHVCKSFKK  
DDB0219988b ..... PSLVQIVKMKIKHKAF ..... LTKOPTL  
DDB0231182 SNRSKDNQSKLDPKRLTKLKKSMKDLPT ..... PYKLLDHPFF  
IksA ..... RDLKDMITILLRAKPHERPT ..... ISQILSTHFI  
IreA ..... PDIHQLVHSMIQEPEKRPD ..... IGECHNHPFF  
IrlA ..... APALDLVRLMISQDEKKRPT ..... IDTILNHPLF  
IrlB ..... QLACTLIKSMISKDESIRPT ..... IONVNLNHPLF  
IrlC ..... LVACDLISQMISKNESDRPT ..... IEKILLHPFF  
IrlD ..... LVACDLISQMISKNESDRPT ..... TENILLHPFF  
IrlE ..... LVATHLIELMISYDESKRPT ..... LSSVILKHPLF  
IrlF ..... LLACDLIKSMISNDESKRPT ..... IENVNLNHPLF  
DDB0216373 PKPFPPSQTNYSNQFNQLIIDMVNLDKDERLH ..... LNQVIERINO  
DDB0229347 ..... NYKIPDNSKYSNFHKLIOFILVADPTORPS ..... INDLINYLNE  
DDB0229350 ..... NYTIPPNHTHSNDLISLIKIMLNPDPINRPN ..... IFETINQLNL  
Nek2 ..... GRYNPISQYSEHLSKVIISLMINVDPKSRPN ..... VNELIGYSFI  
Nek3 ..... GTYPPIPSHYSNDRNLISSMLQIDPKNRPS ..... VNDIELPFI  
Nek4 ..... GQPLPISPNYSDLQNLVYQLLEKOPTKRPS ..... IFDIFOMPYI  
DDB0229345 ..... EELSSLLFKLLNKNPESRFS ..... TQQLIEQVFI  
IfkA-b ..... PDQTOIIRSLLSRDPTORPS ..... TKQLIESGLL  
IfkB ..... PDQTOIIRSLLSRDPTORPS ..... TKQLIESGLL  
DDB0216407 ..... SRQATLIRMLIDKDKPAKRPS ..... AQQLIQSELM  
DDB0229432 ..... PEESNLILRMIDINPDNRPT ..... SDQILSELLP  
DDB0220611e ..... PKVSELILLMMKTNPDERPS ..... ASDILKSDLF  
DDB0220652 ..... PNDTDFIDH.LIQSFATRPF ..... SNQISTDYDN  
PLK ..... HYGKSLIISILNPVPEORPN ..... LTQILIEHDF  
Vps15 ..... PNIQTLILHMIQKDPDQRYT ..... PEKYISKWNT  
TBCK ..... NSNIGLGNLGGKELIEIEQCLIPNPMDRPD ..... SETLIDHPYF  
TtkA ..... ENLLKVLKLCILRNPHERP ..... IPTLLNHDFL  
DDB0220004 ..... TEFWQLIKSMIHPDPSVRPS ..... AEQLIEHPLI  
DDB0229384 ..... DSLYQVILDMMKSNITERIS ..... LDQILLNENI  
DDB0216398 ..... QDLKDLIILMMNPDHTRIT ..... IQSILKYDKL  
Scy1 ..... ..... FAVKTESRLN ..... POKFIESPYF  
Scy2 ..... KVCTILLG ..... DPMLRGD ..... LENFIRSSFF  
SLOB1 ..... DKVFLLLQOIFS ..... EKTEPT ..... LEEVLKNPWF  
SLOB2 ..... PEVRKVLEAIFKPFYGTPT ..... LEELSKMDF  
DDB0229334 ..... TEQDFLHSLATNLSDRLD ..... AQTLLHHPFI  
DDB0231326 ..... PAILDYLDYVFIIRDPPYRPT ..... LRDLLTKFIA  
DDB0231559 ..... QPLSDLIYSMLNHNEYDRPT ..... SFEVFOKLKK  
DhkG-a ..... LILSNIVNKLKQSPDDRYO ..... SAYGILKKDLE  
DDB0231198 ..... TRIKTLIASLLAEQSQRKOS ..... FNEVYNDLQD  
DDB0231179 TQFTTITFDKFNPIISQIINYIQ.YYRNRP ..... SSQVIESLIN  
DDB0231335 ..... HSKSYNDERQIEYIFAKRDNDKF ..... LLNDKTF  
7TMK2 ..... EPVIOIYKSCTSDDPNKRPS ..... SLGVKFHLAN  
DDB0229381 ..... KYGLVDPDIELGISFITSLQLDPKRLP ..... LKELIHNHPFL  
Bub1 ..... TGKLEIINQSIIQK.DSFS ..... ELDTLWLPFL  
DDB0230007 ..... QHFNDLISKILEKNPQKRIT ..... WPKLFIHPFF  
DDB0229337 ..... QFYKPENSLLIQLITCCLFKNPAORIS ..... WNEIVNHSFF  
DDB0229346 ..... .....  
LvsG ..... .....  
DDB0230125 ..... FQQAQNINYE ..... EL.KNEFI  
DDB0204911e ..... FQQAQDKNYE ..... EL.KNEFI  
CK1 ..... GFPSEFATFLNYTRFLKFEDKPD ..... FLYLRKLLRE  
DDB0216336 ..... PQFSQFMKHLKSLNYEDRPN ..... YVFLQTLND
